# Supplementary material for: Synthesis of selenium-containing bicyclic β-lactams via alkene metathesis
Source: Royal Society of Chemistry journal article supplement (doi:10.1039/b902698c), 2009-01-01
Supplement: b902698c-2.pdf [file b902698c-2.pdf]

## SUPPORTING INFORMATION

### Synthesis of selenium-containing bicyclic $\beta$ -lactams via alkene metathesis

**Dinesh R. Garud,<sup>a</sup> Deepali D. Garud<sup>a</sup> and Mamoru Koketsu<sup>\*b</sup>**

<sup>a</sup> *Department of Chemistry, Faculty of Engineering, Gifu University, Gifu-501-1193, Japan. E-mail: ddgarud@yahoo.co.in*

<sup>b</sup> *Division of Instrumental Analysis, Life Science Research Center, Gifu University, Gifu-501-1193 Japan. Fax: +81-58-293-2619;*

*Tel: +81-58-293-2619; E-mail: [koketsu@gifu-u.ac.jp](mailto:koketsu@gifu-u.ac.jp)*

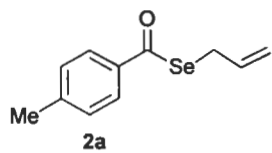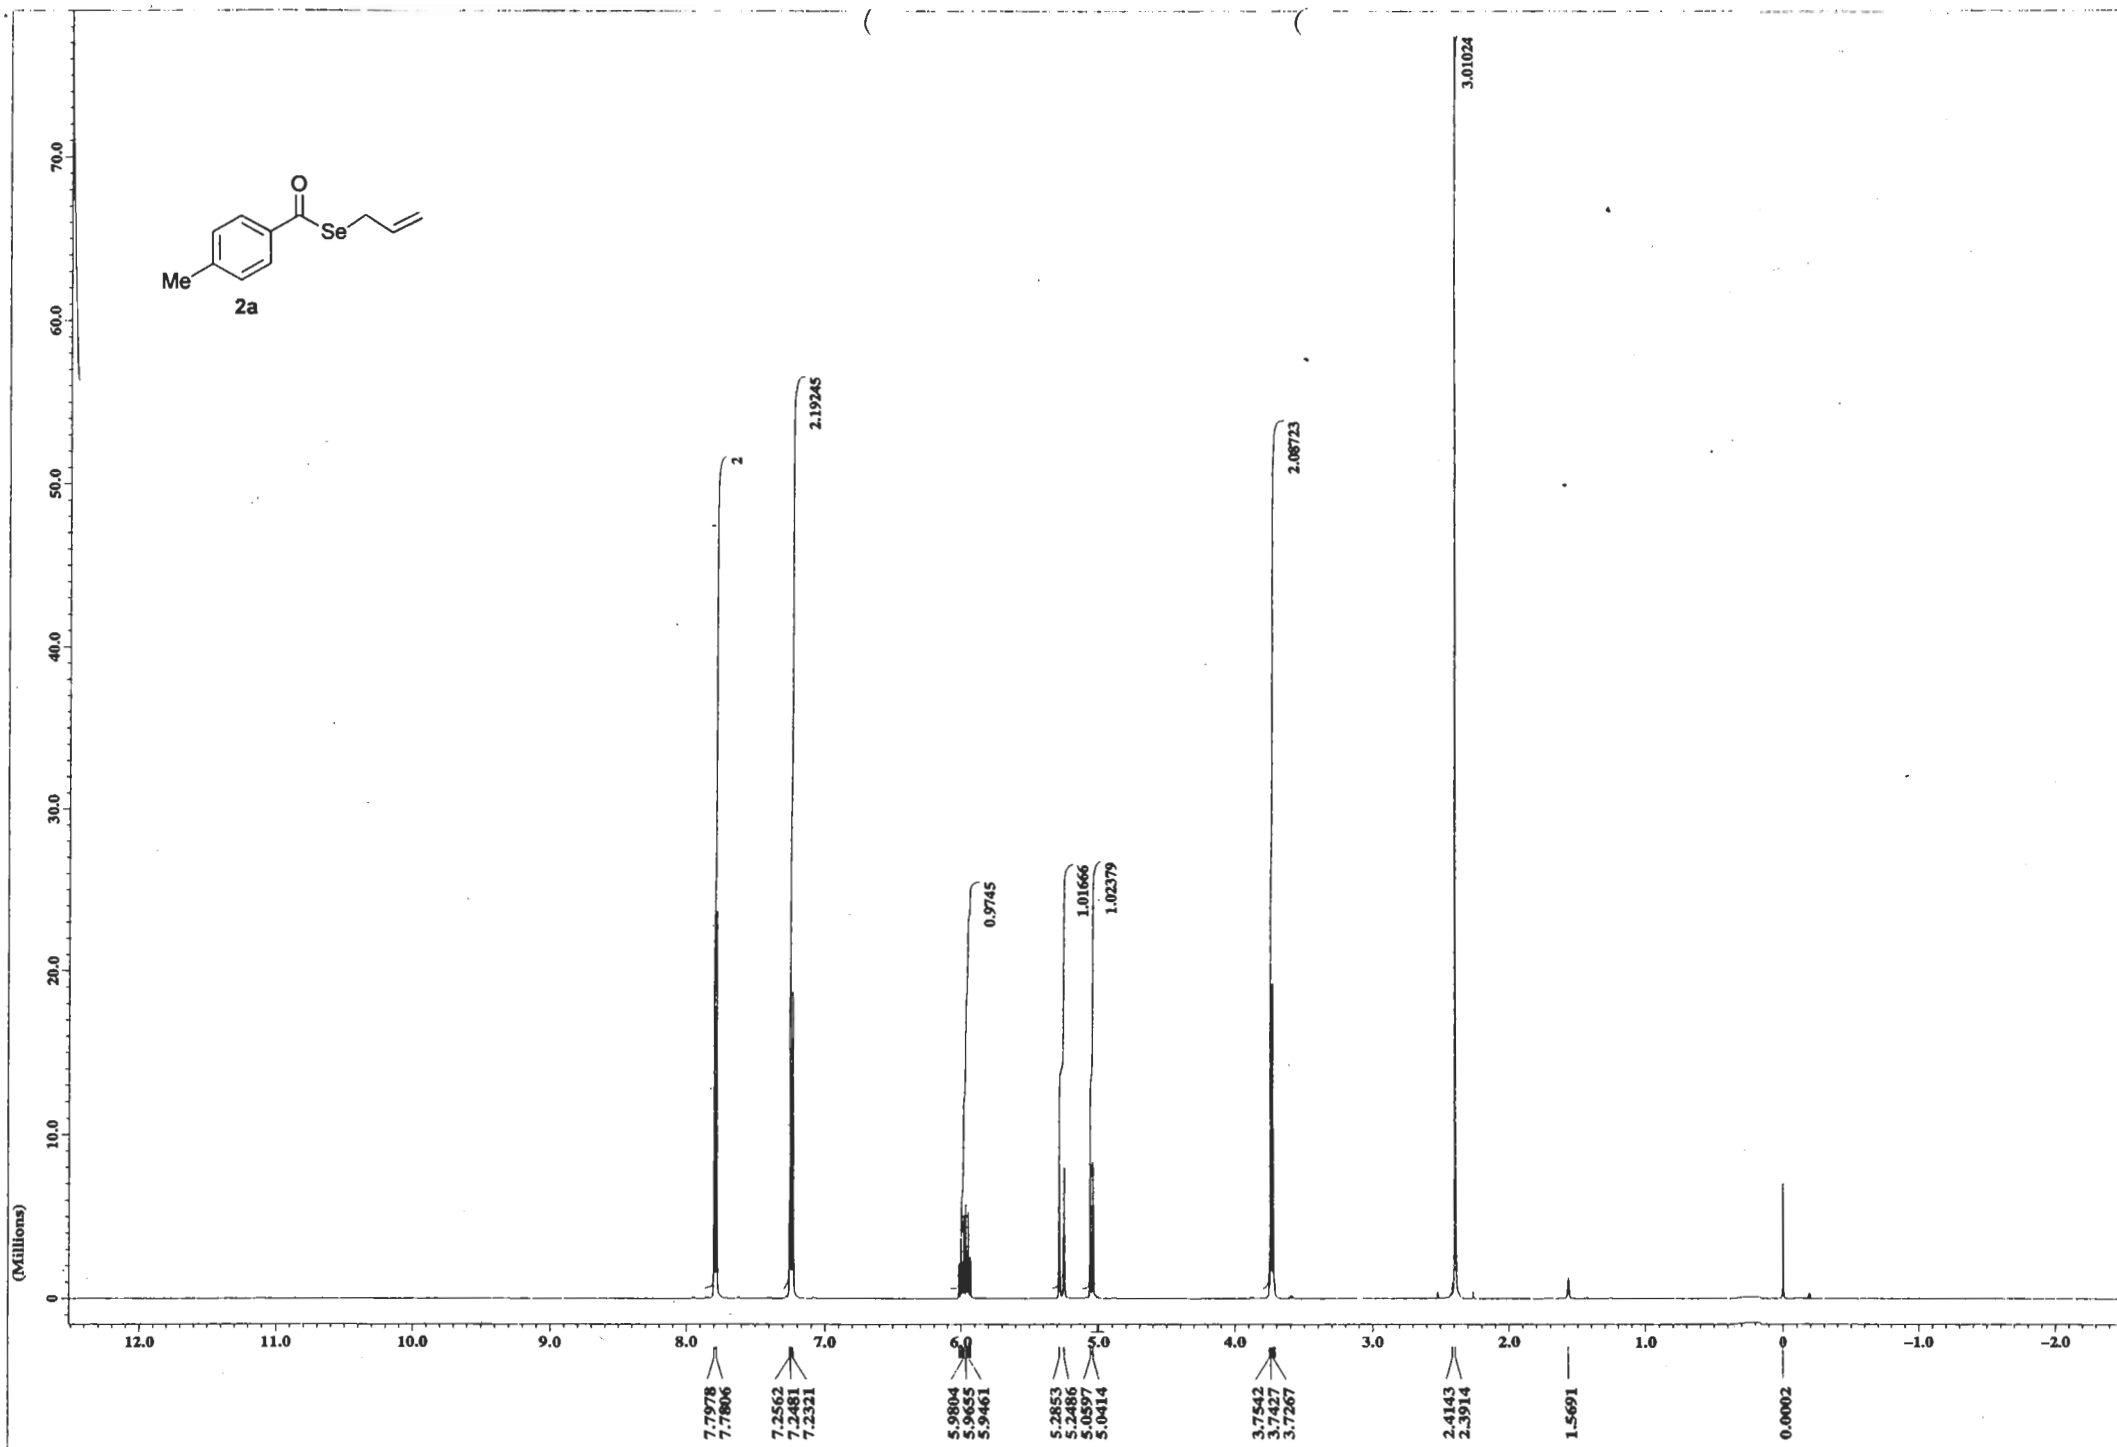

X : parts per Million : 1H

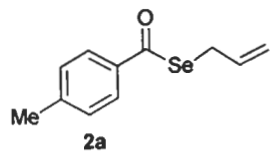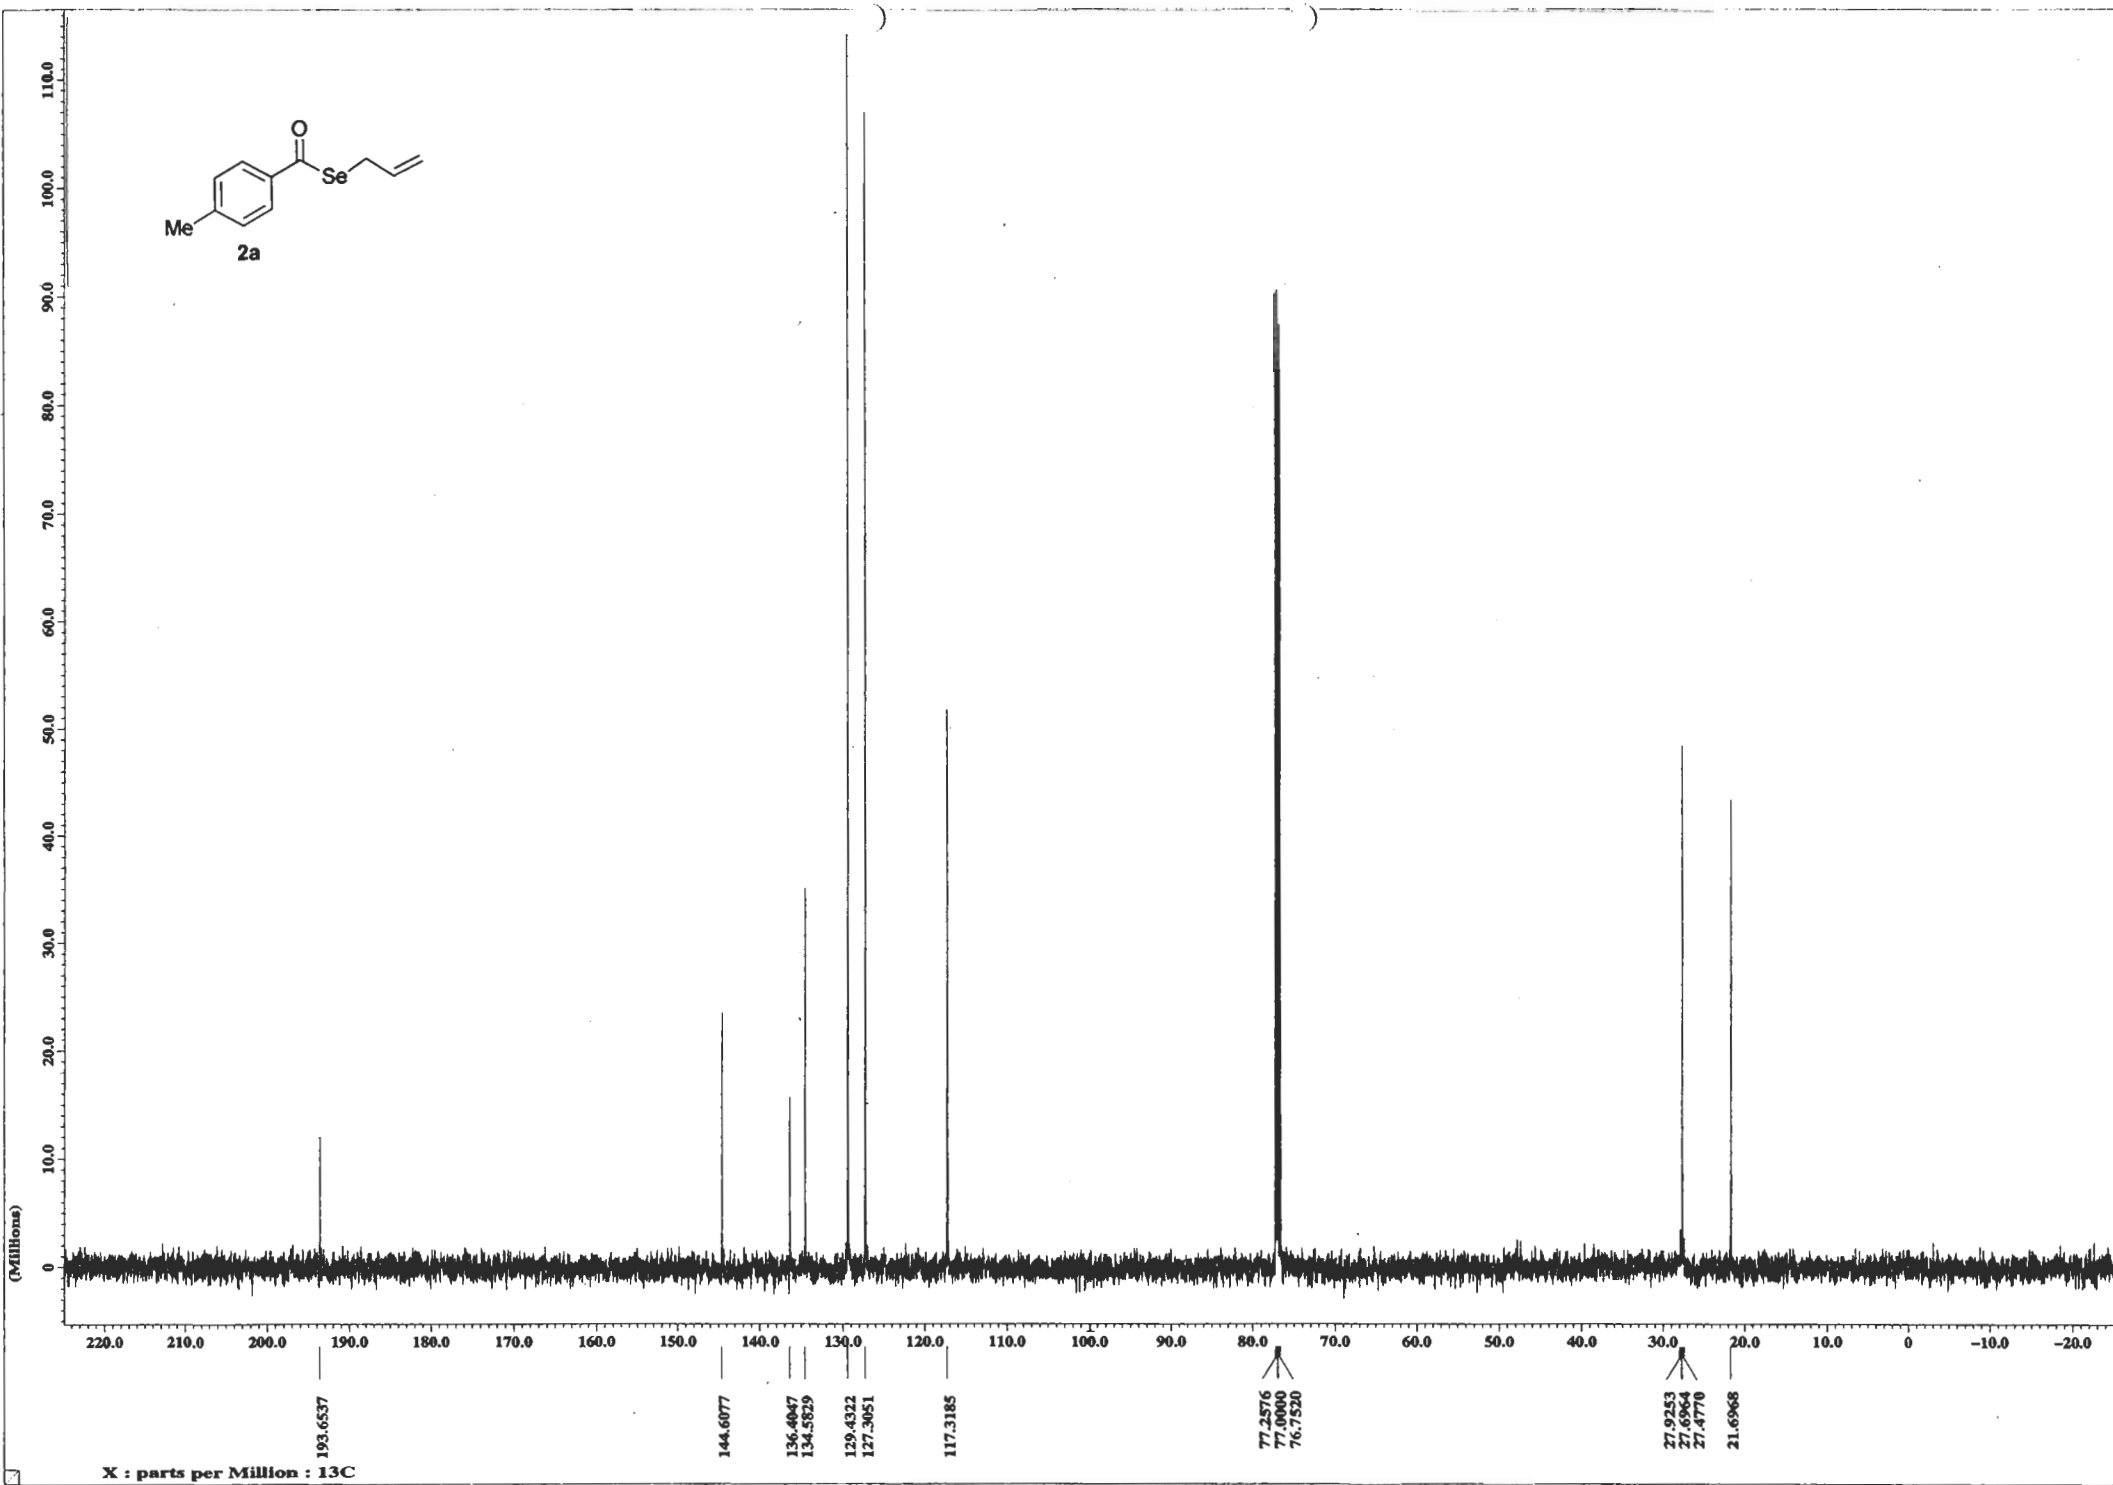

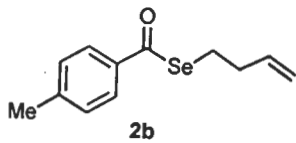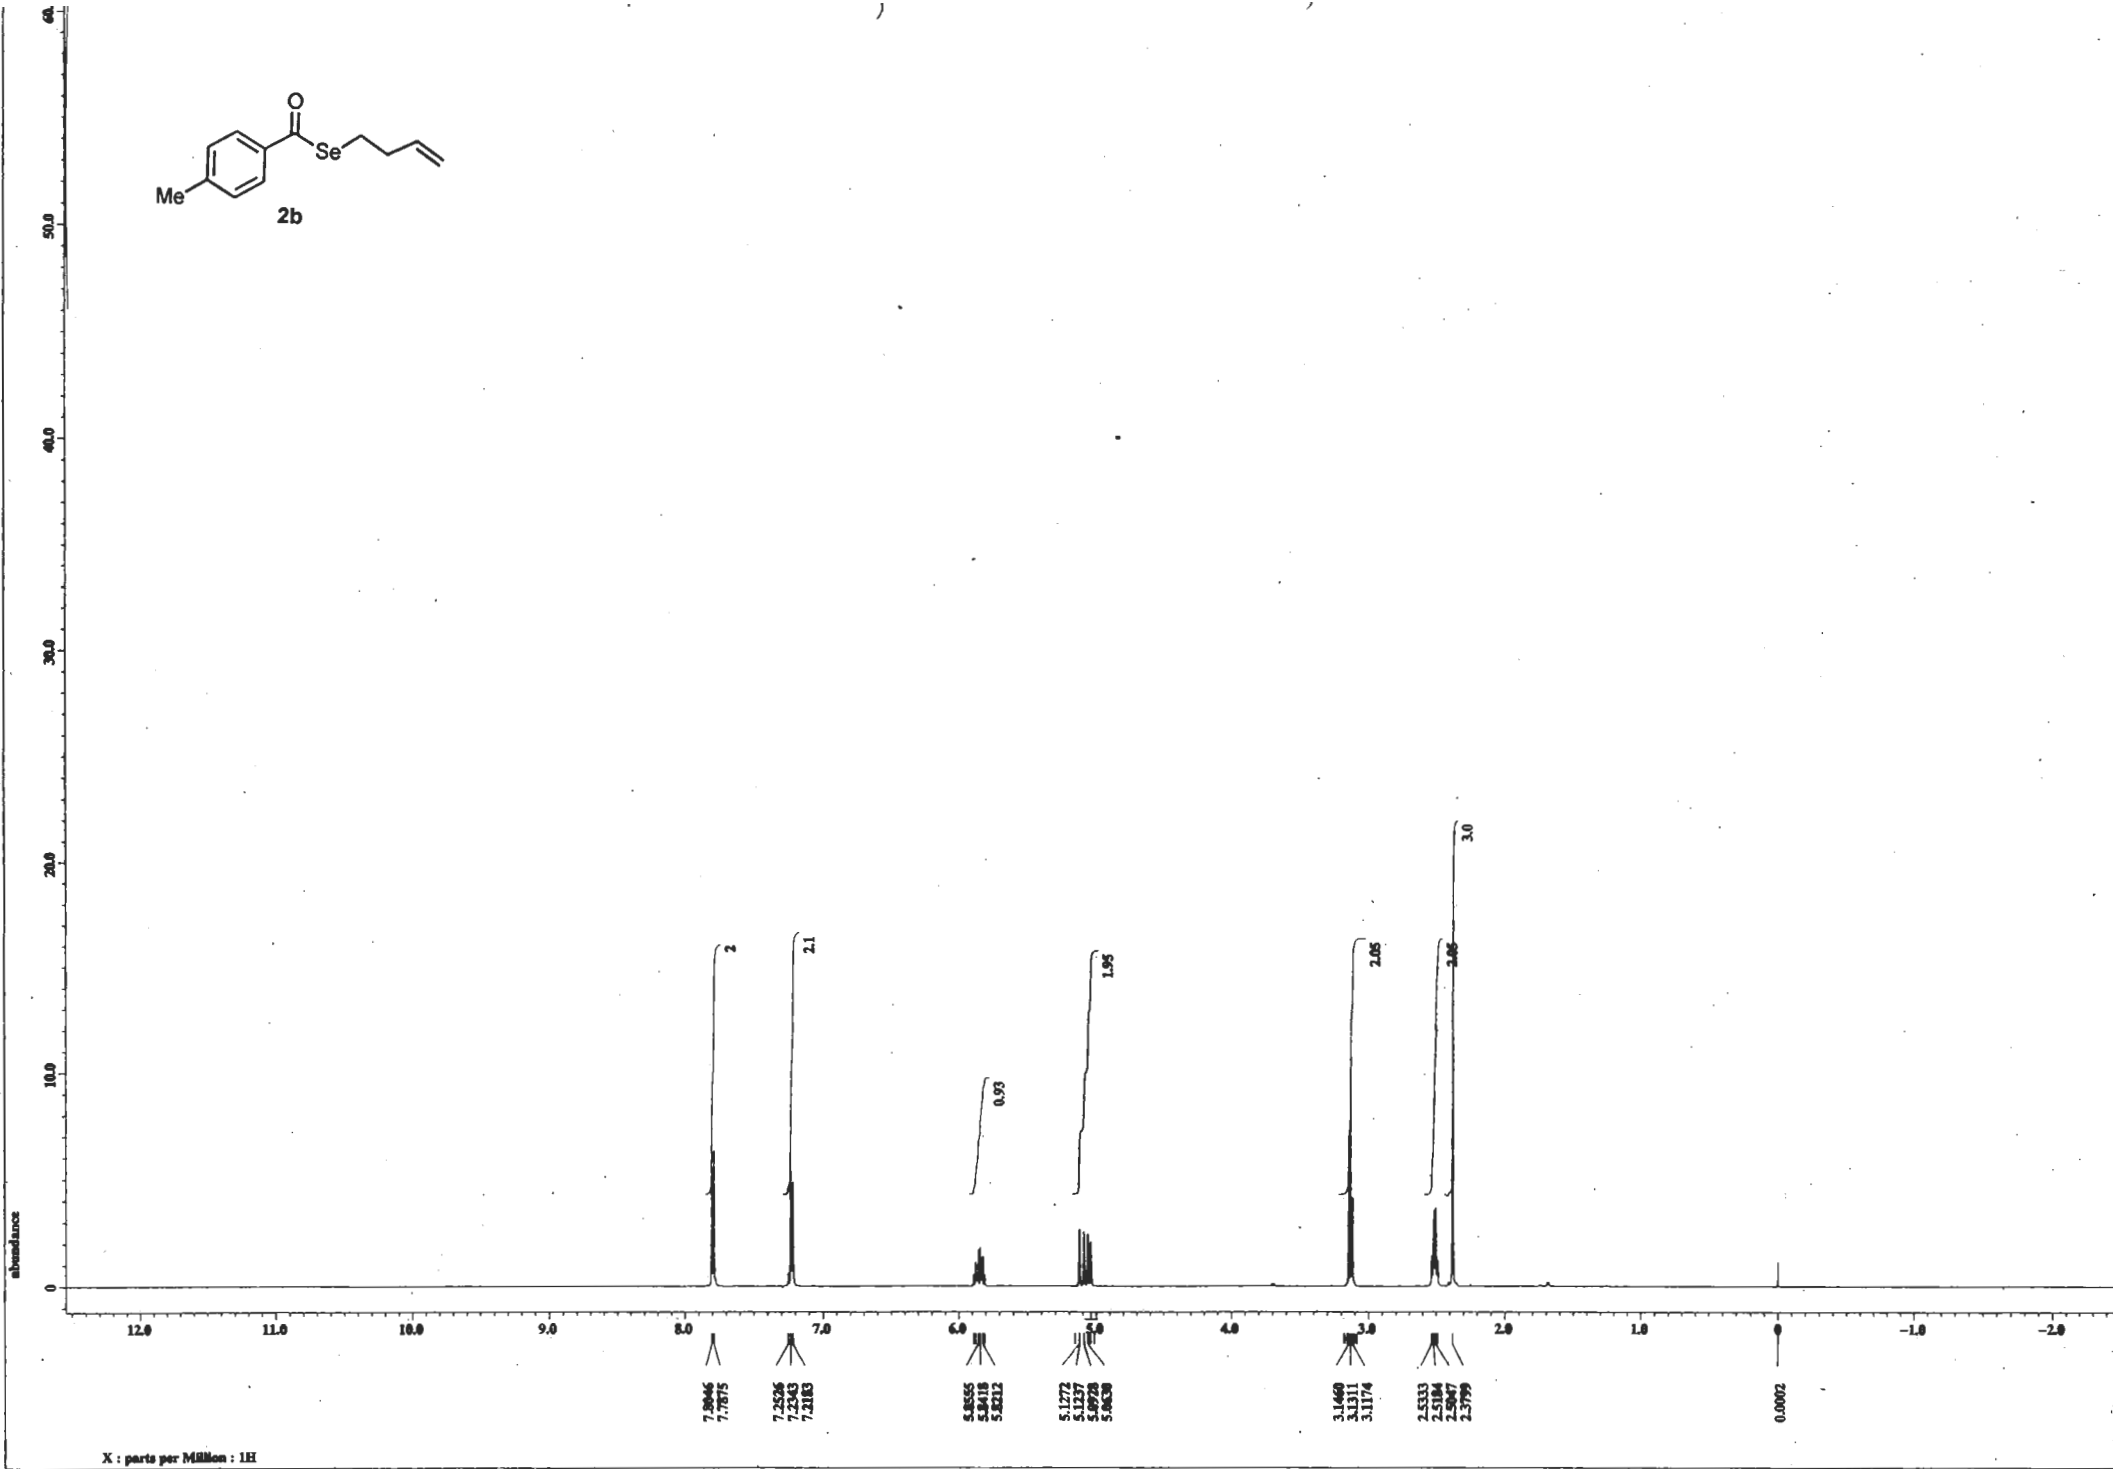

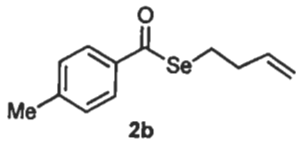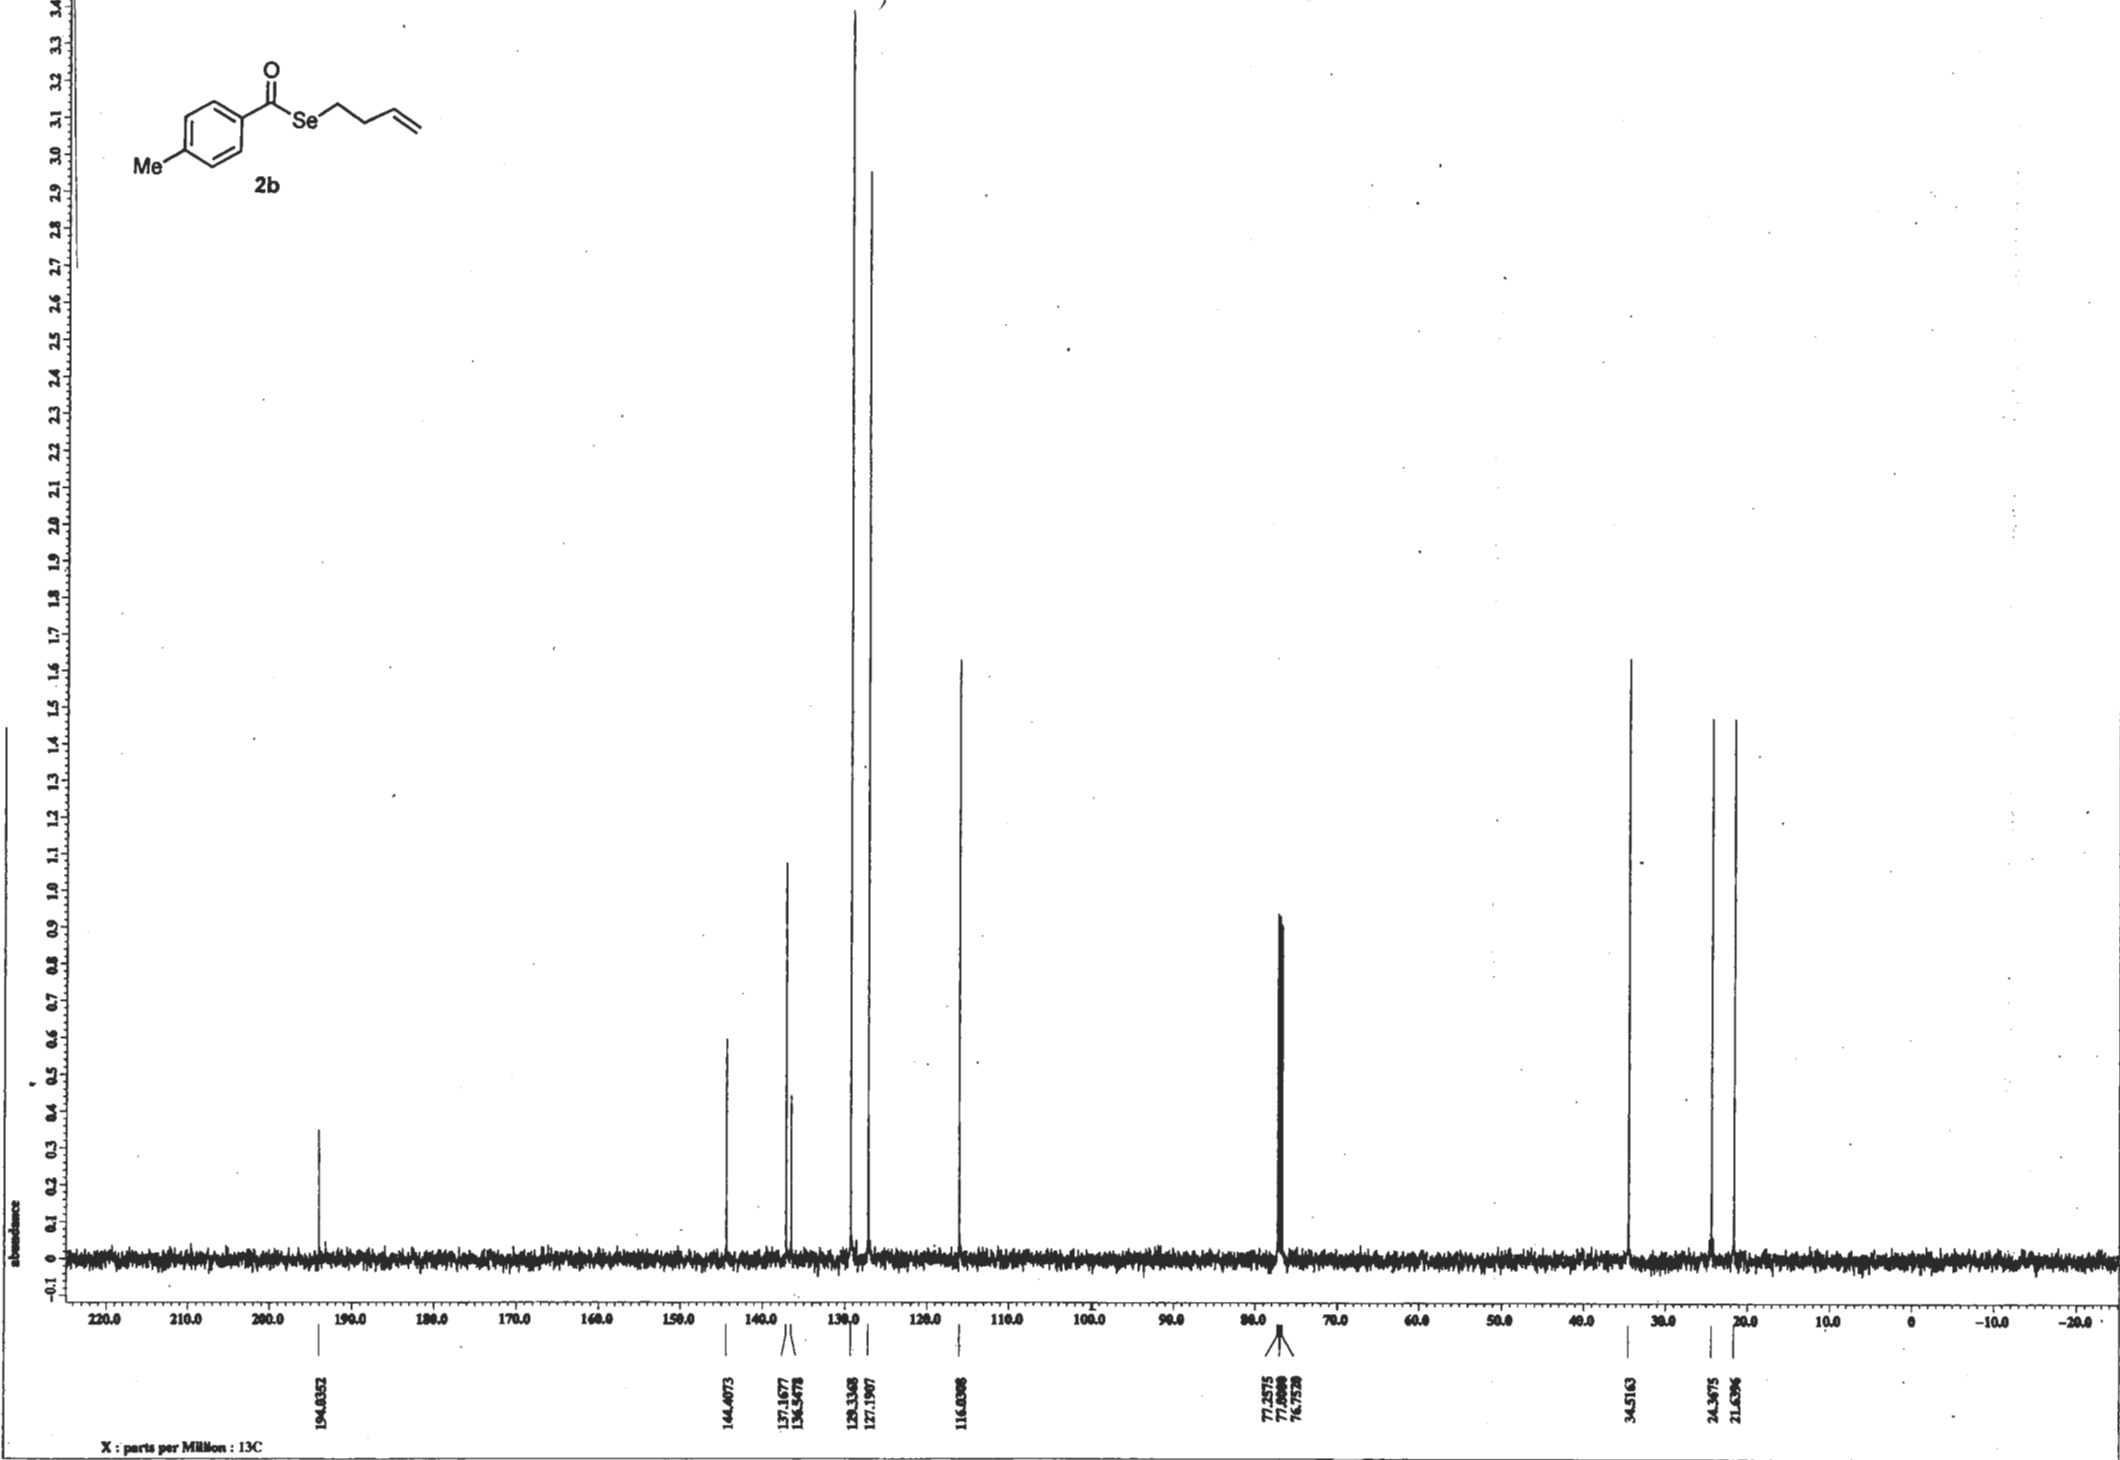

X : parts per Million : 13C

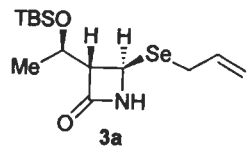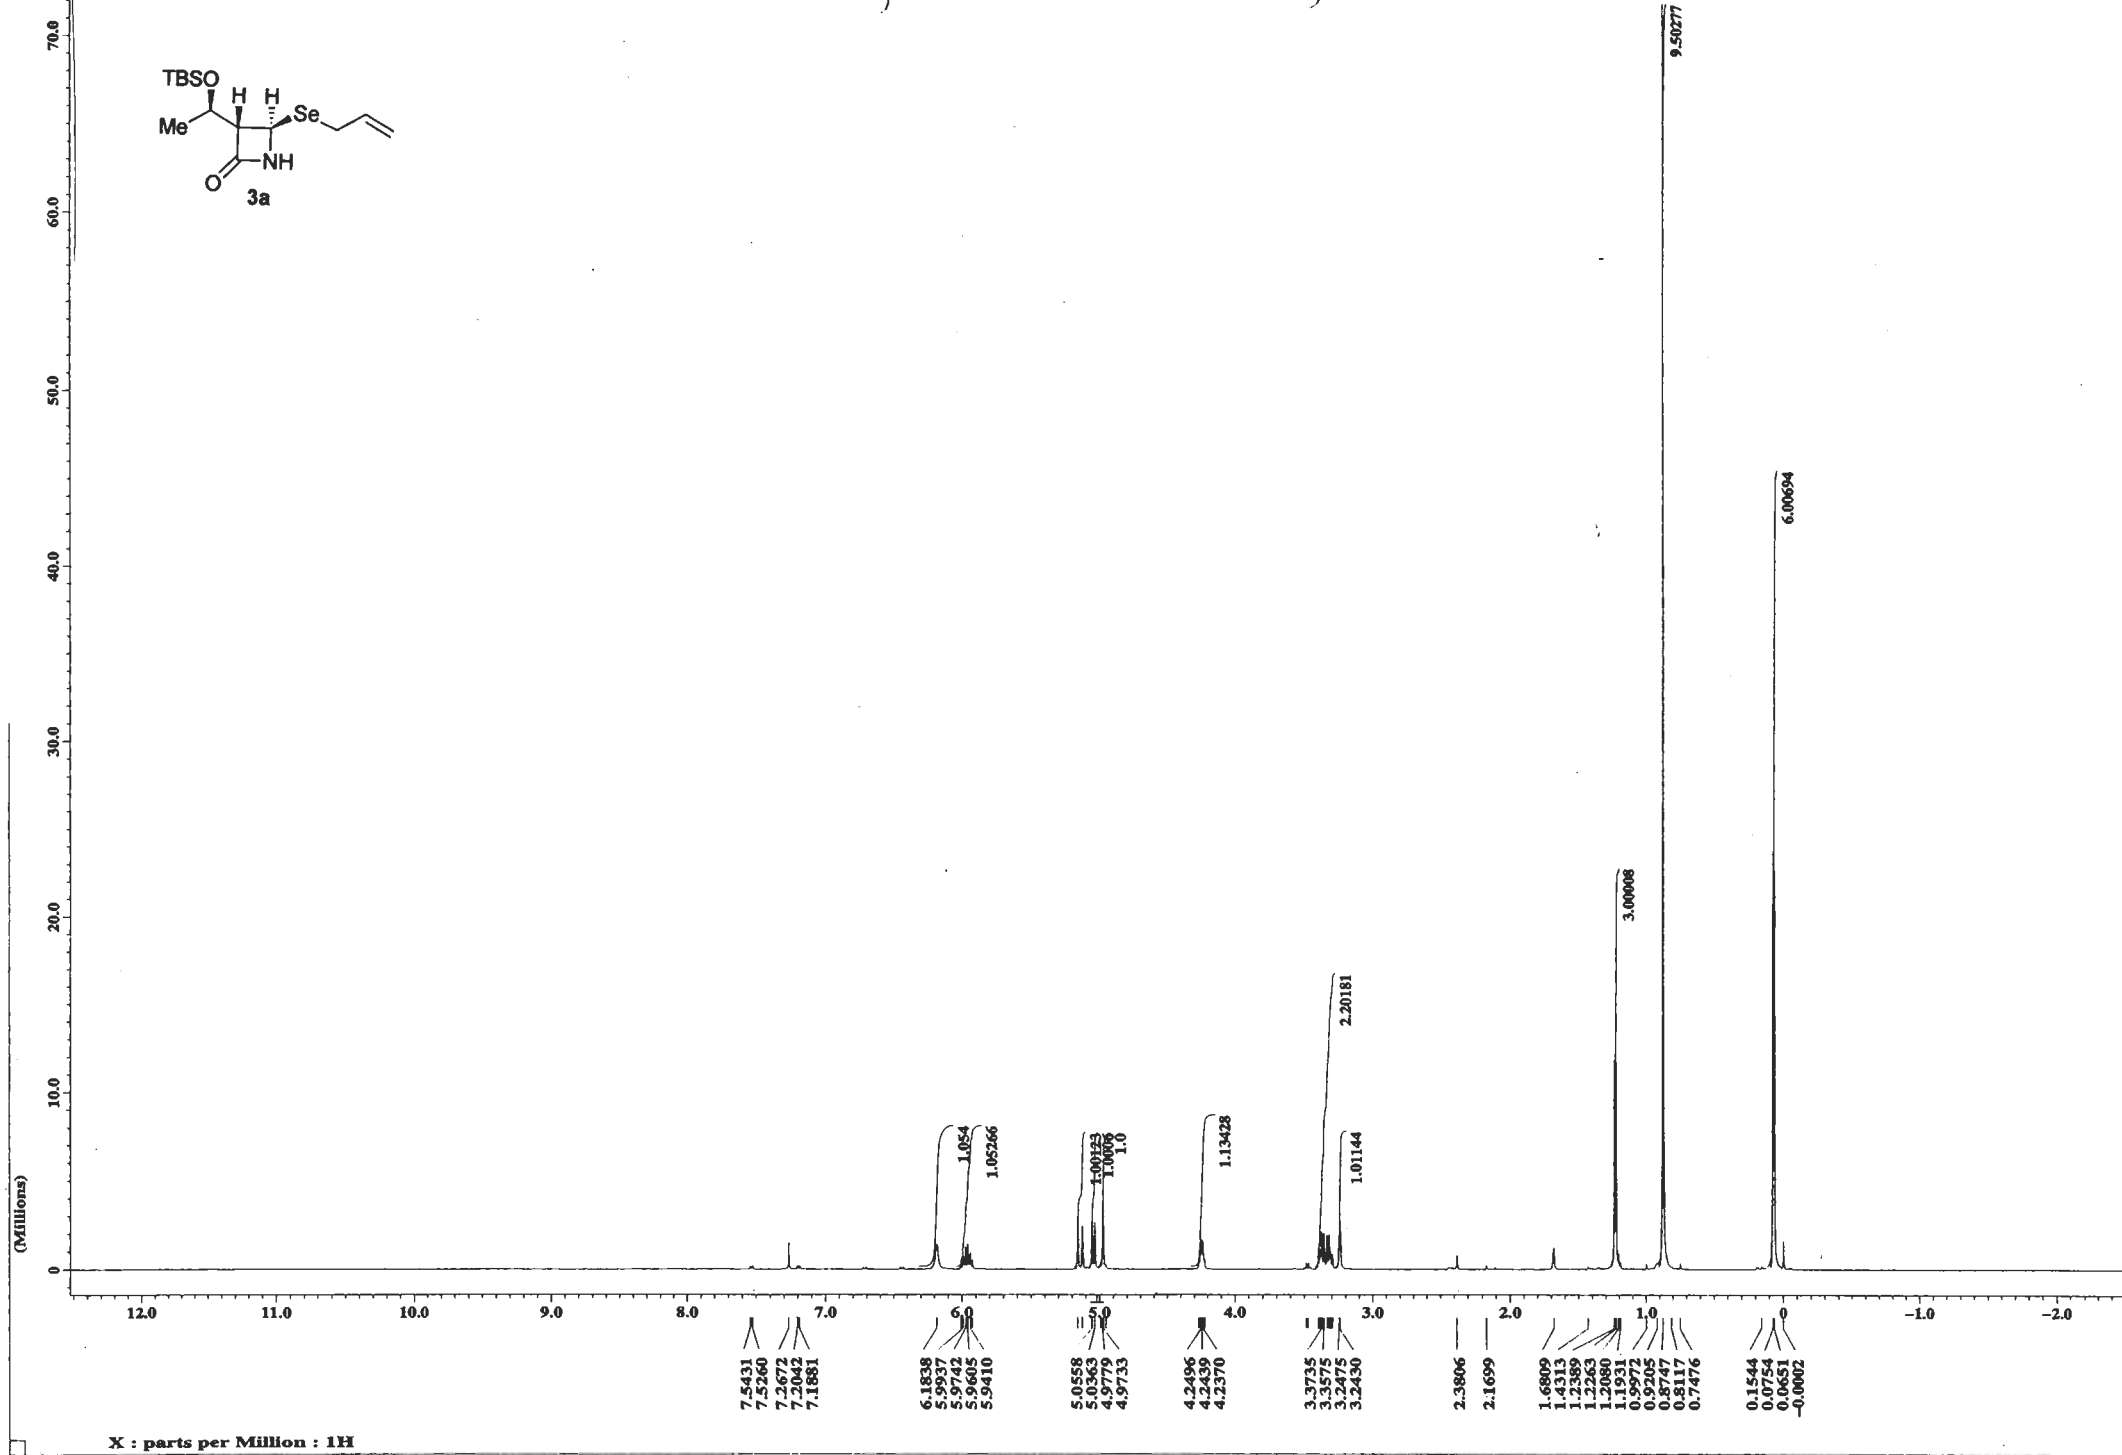



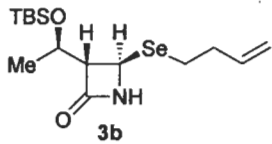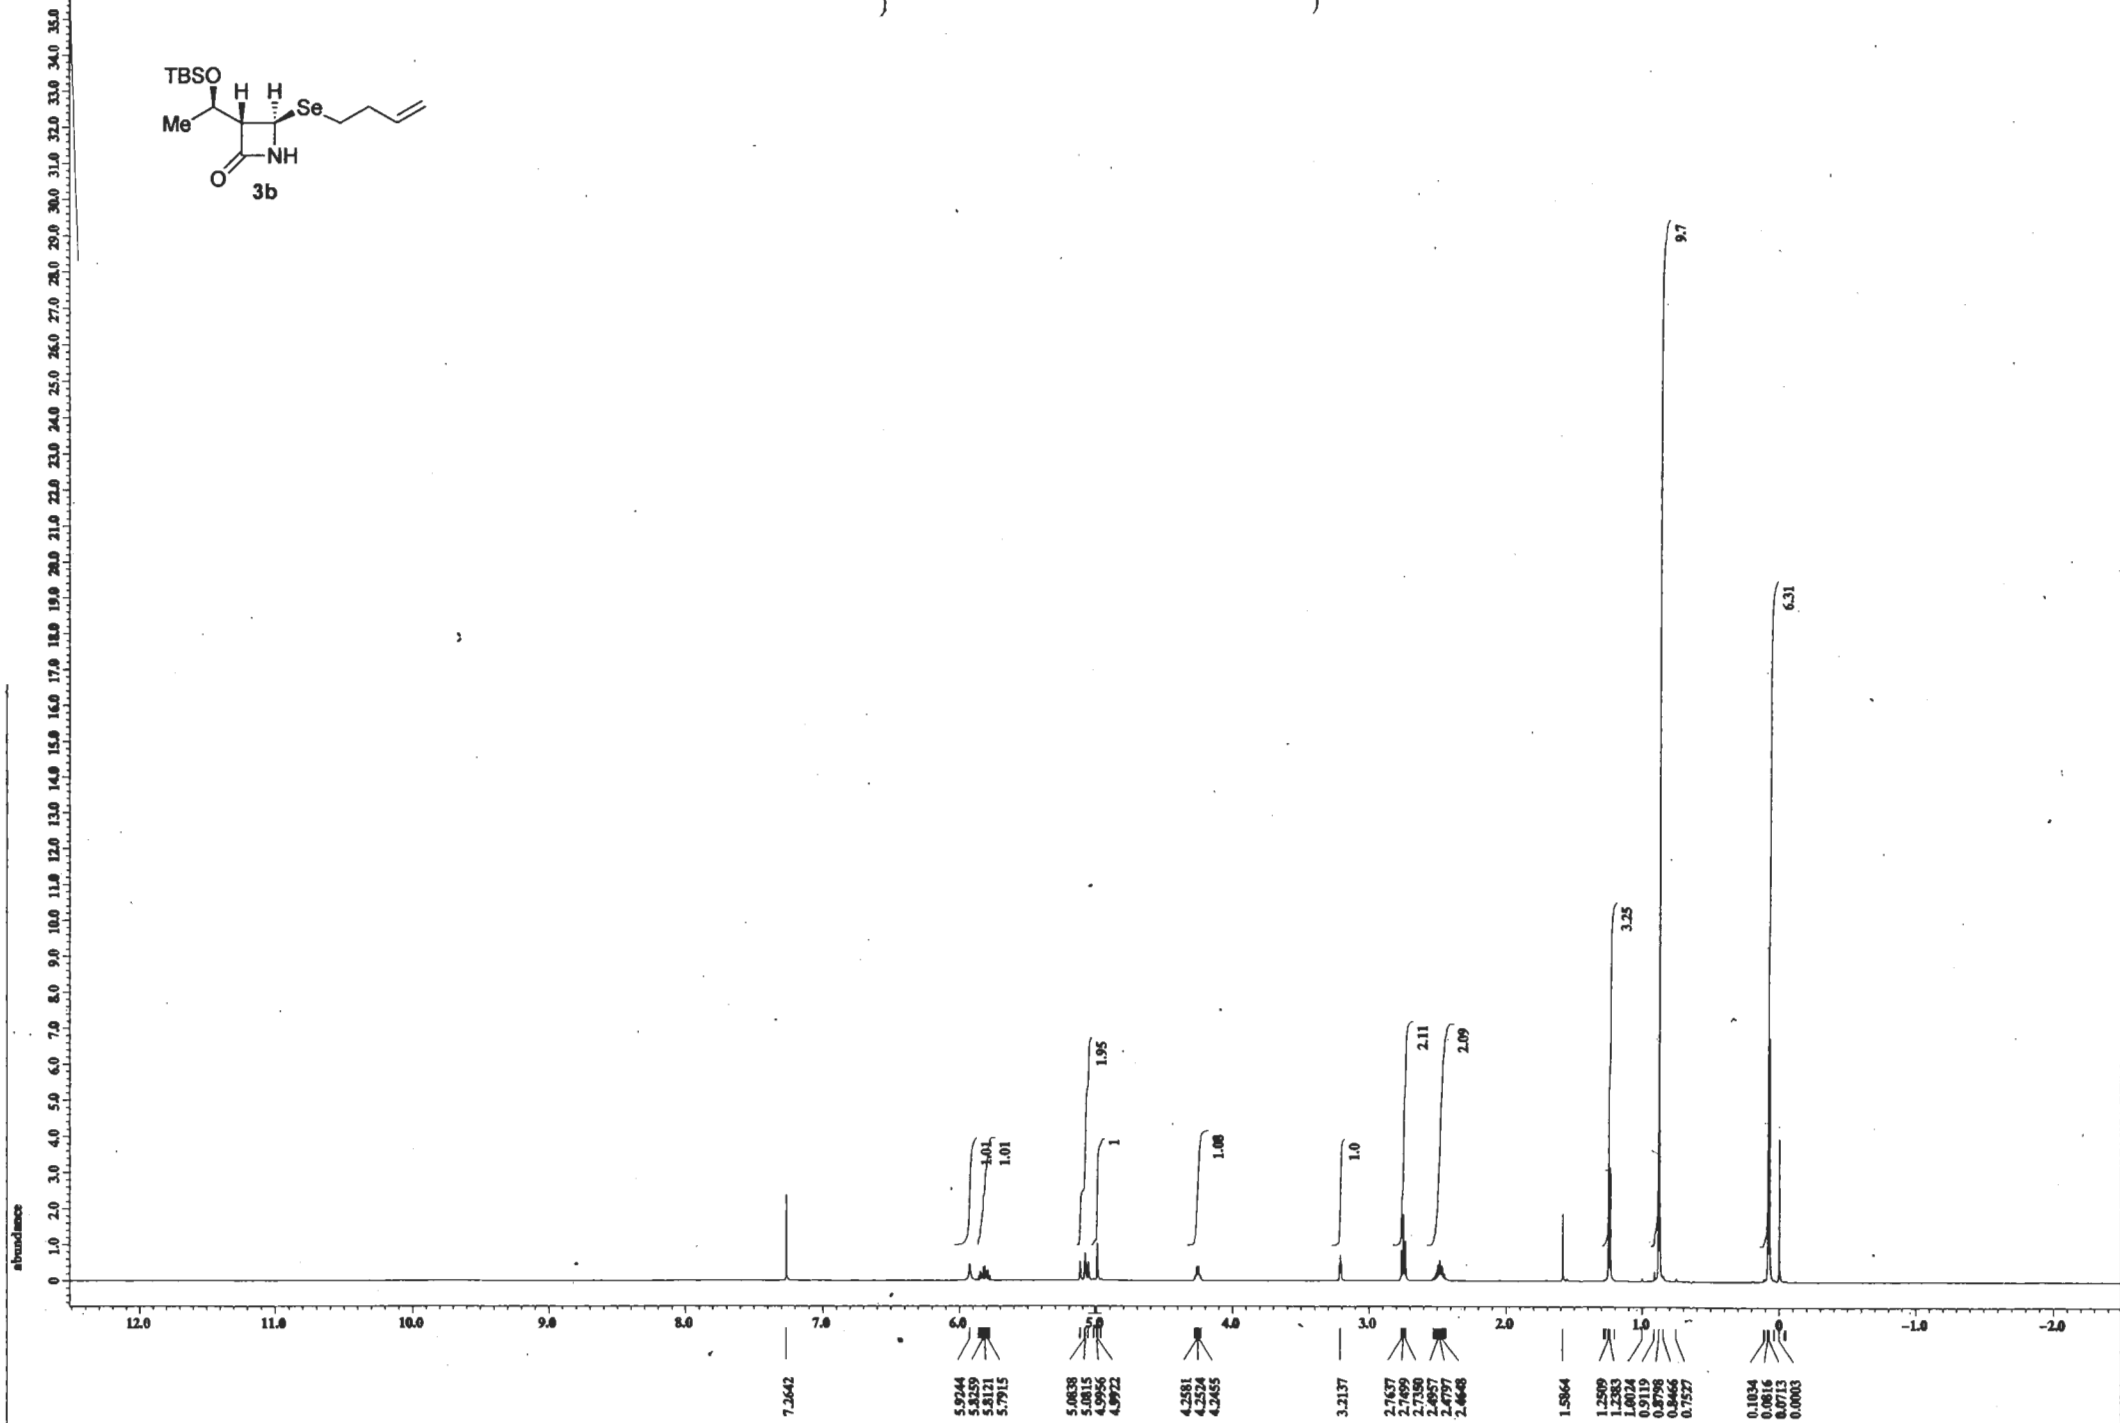

X : parts per Million : 1H



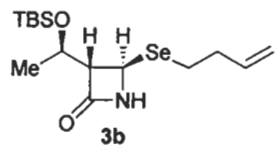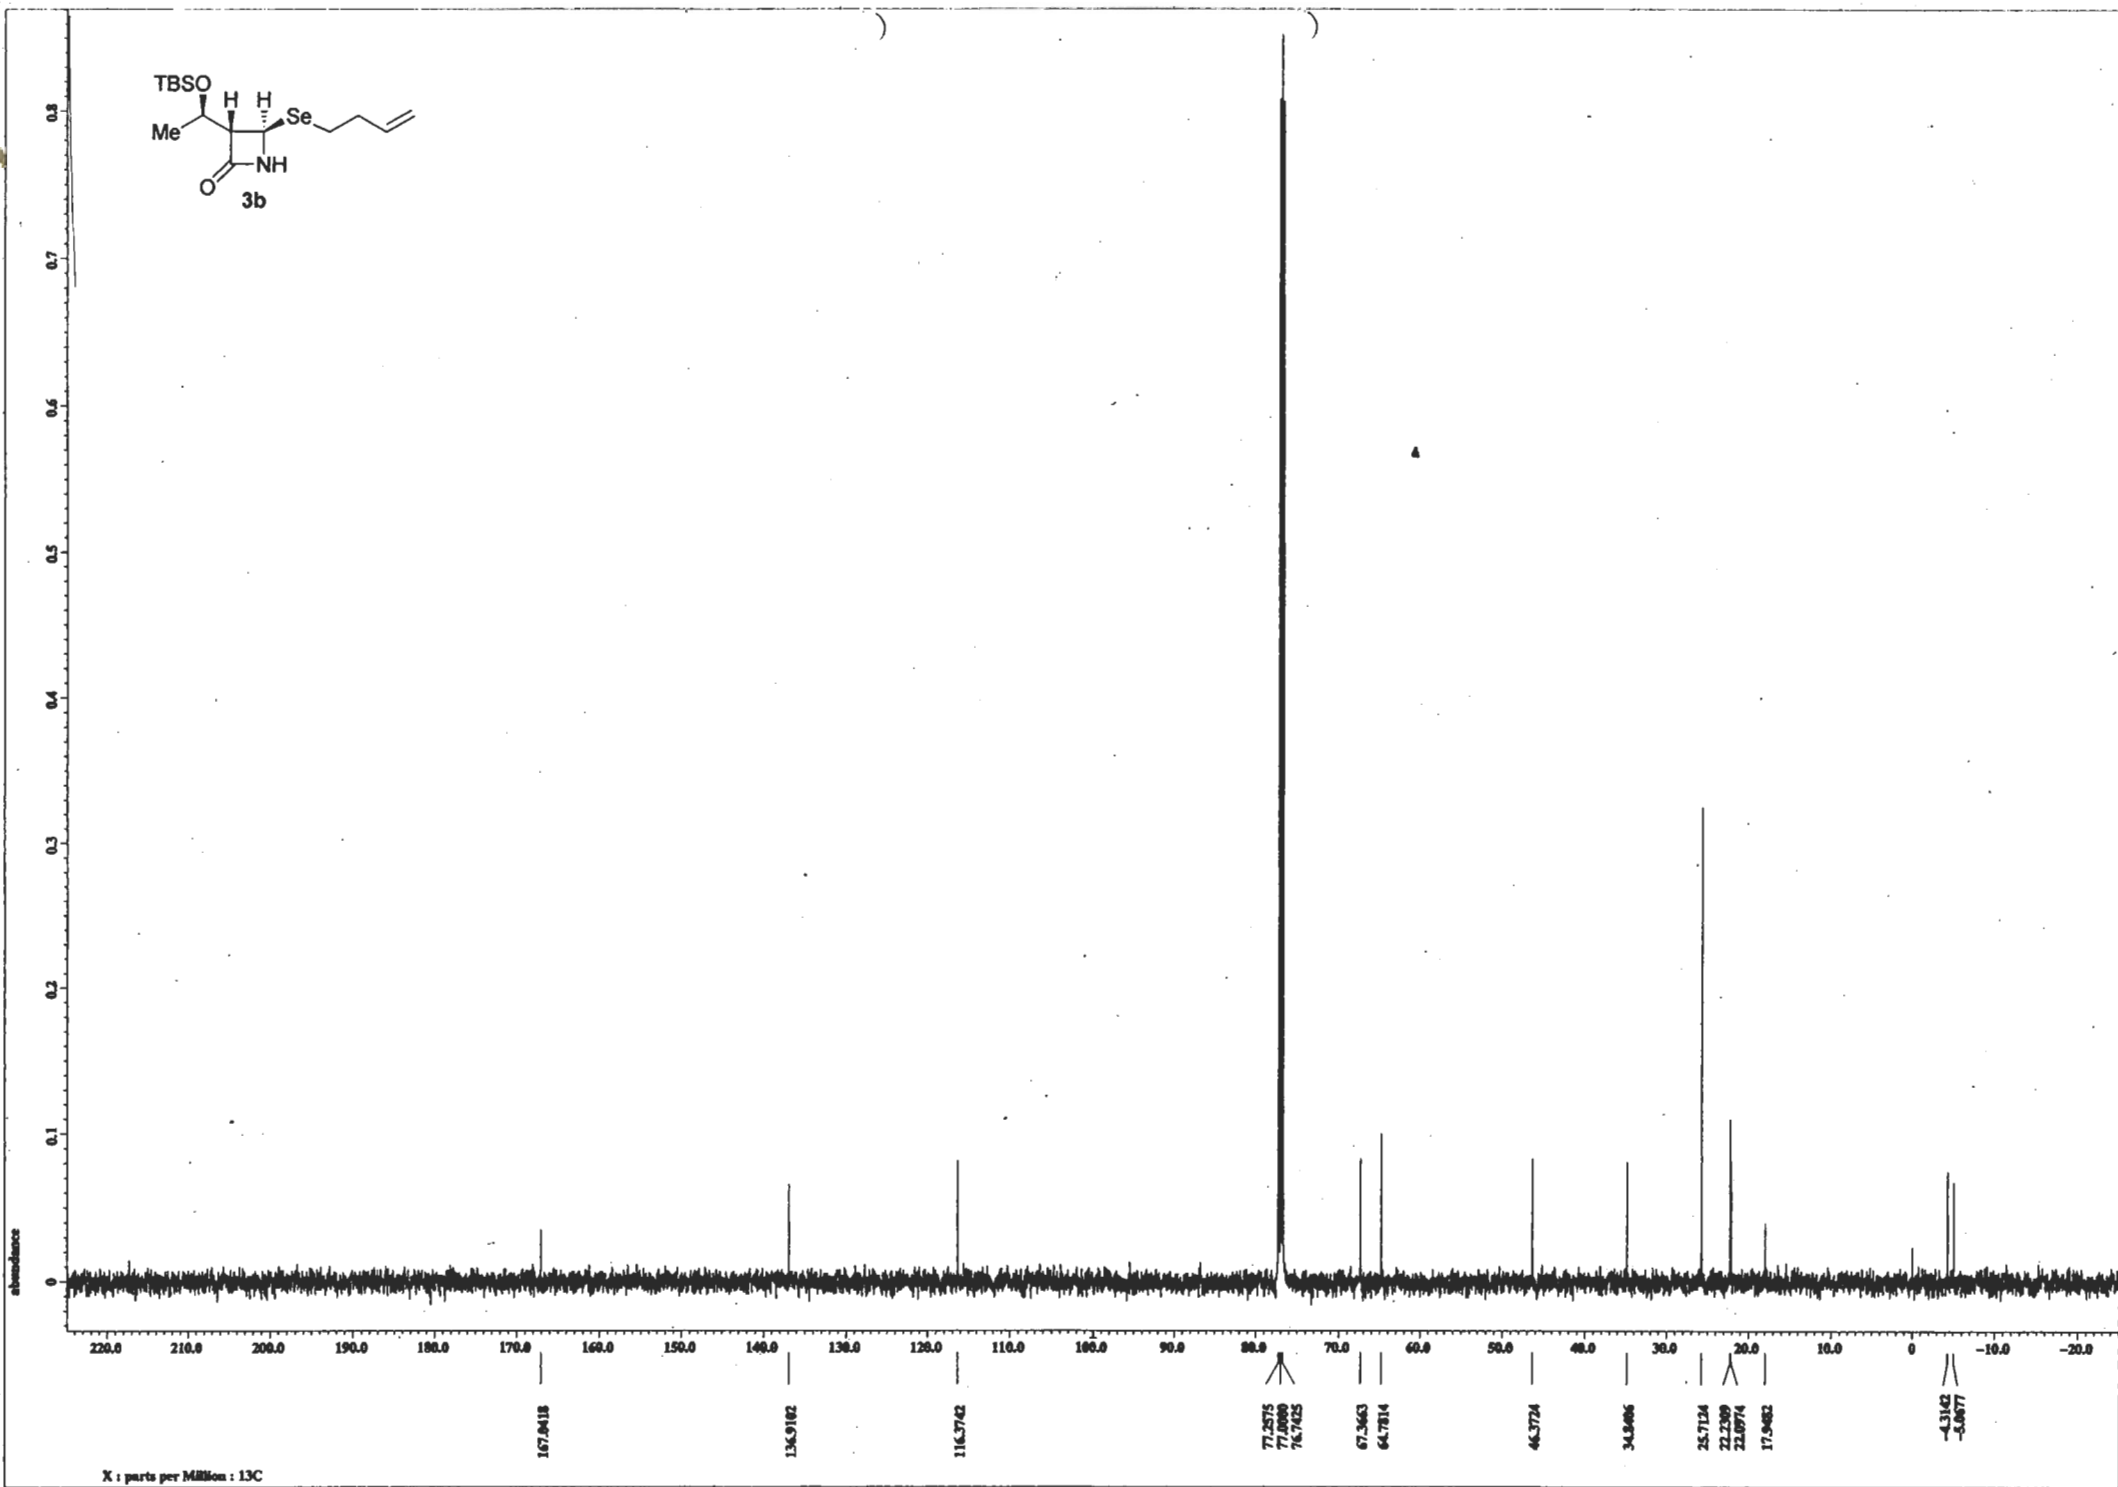



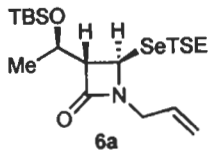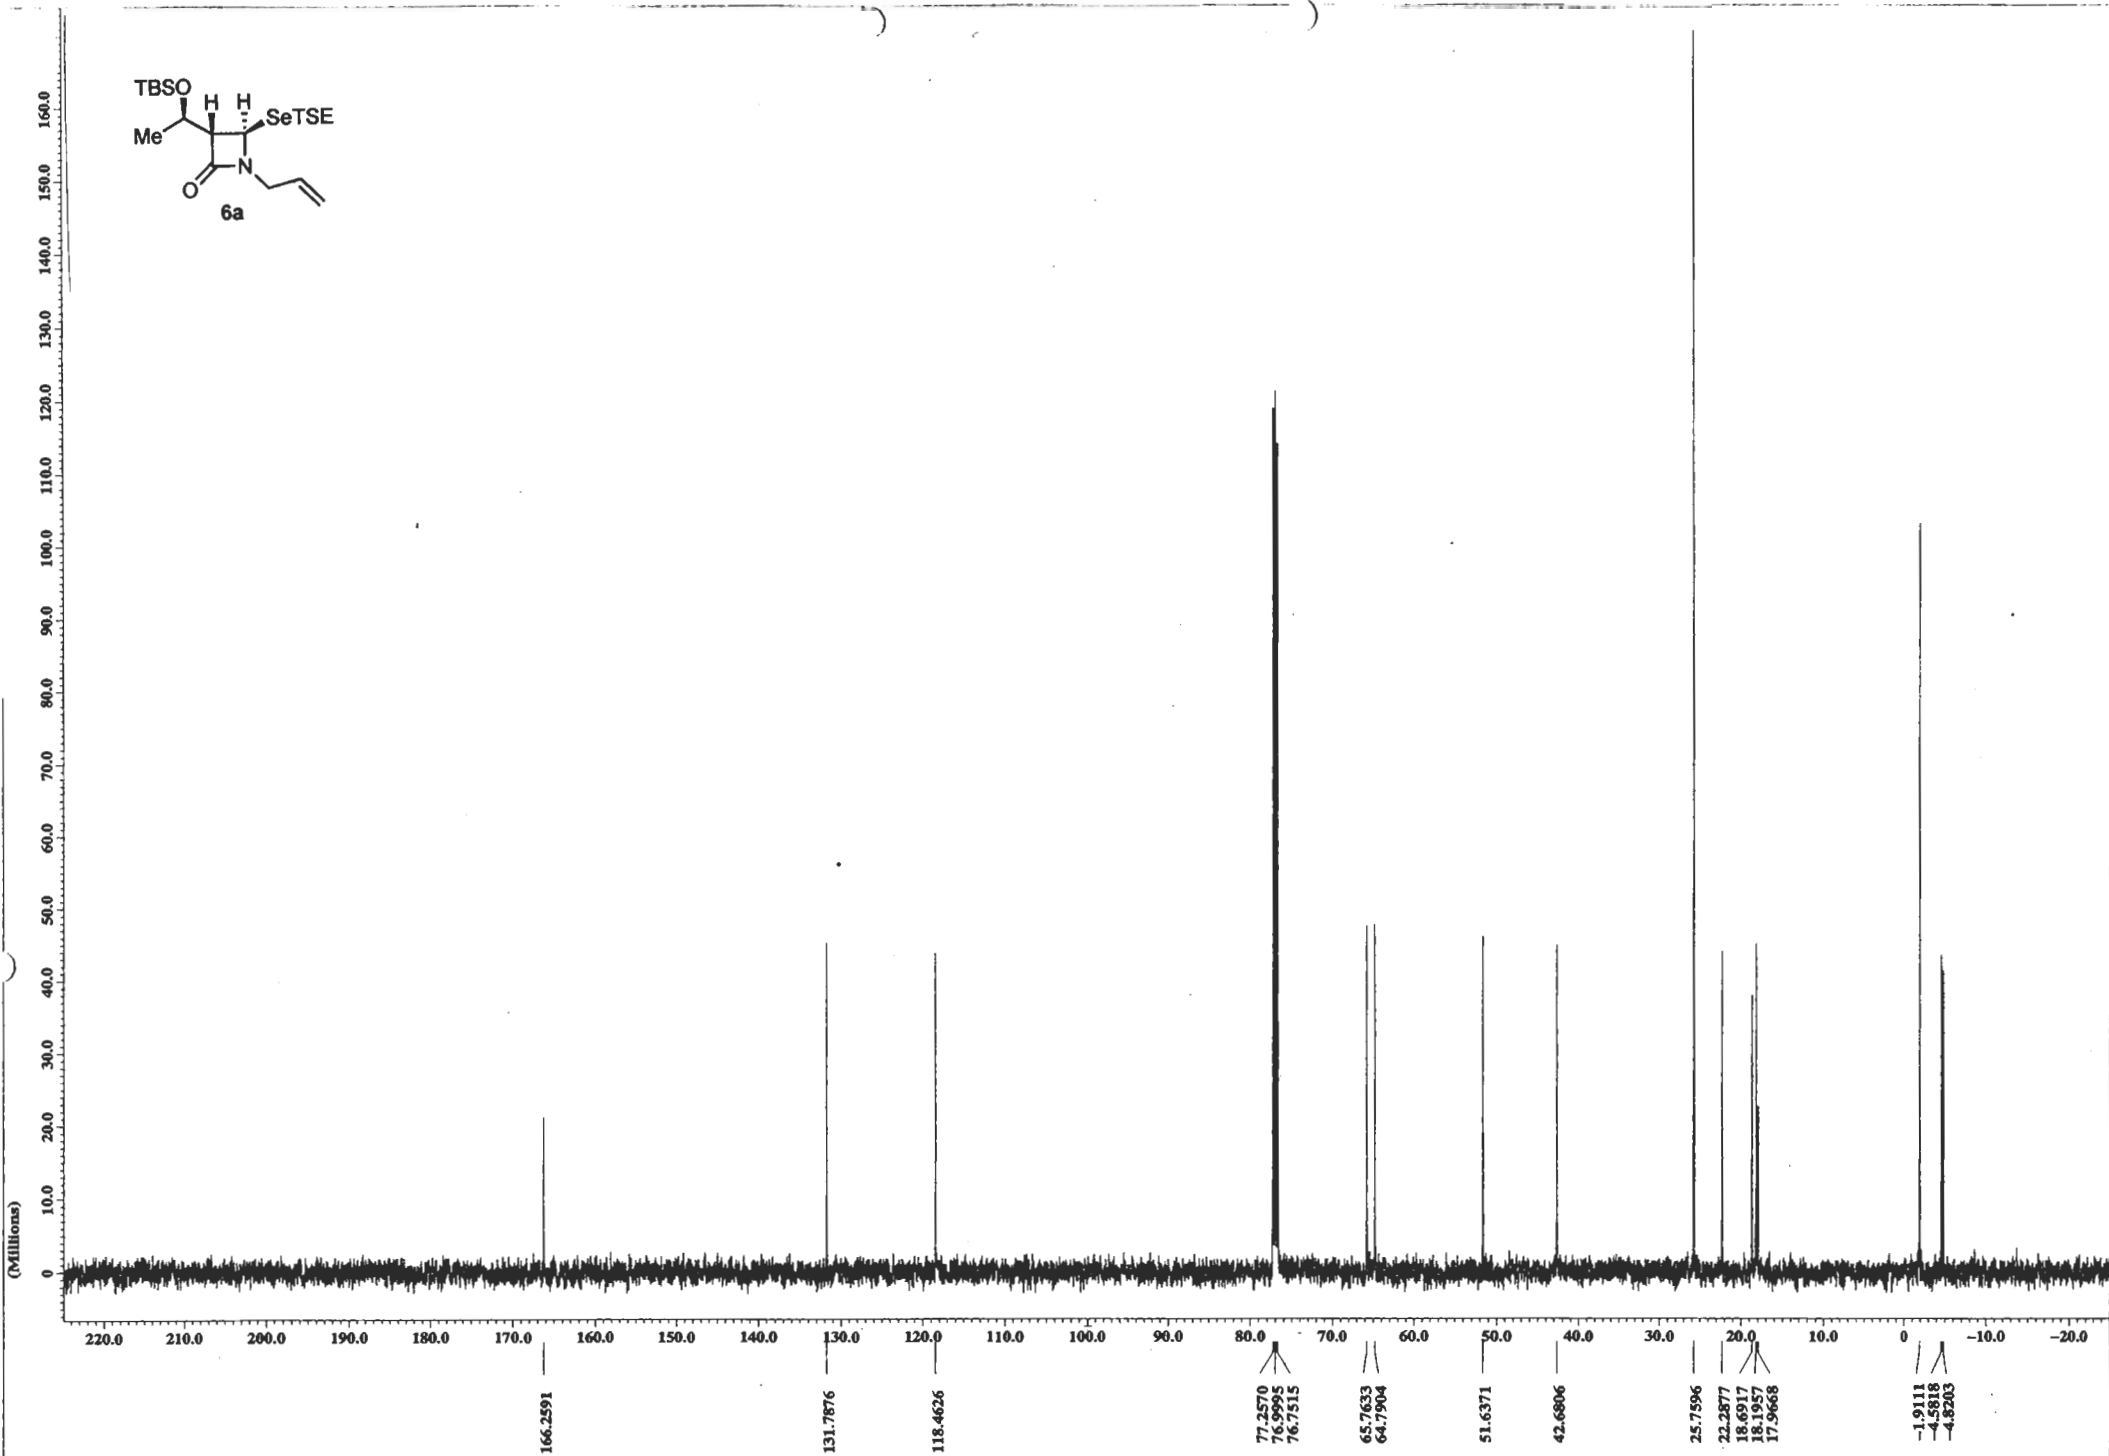

X : parts per Million : 13C





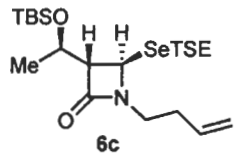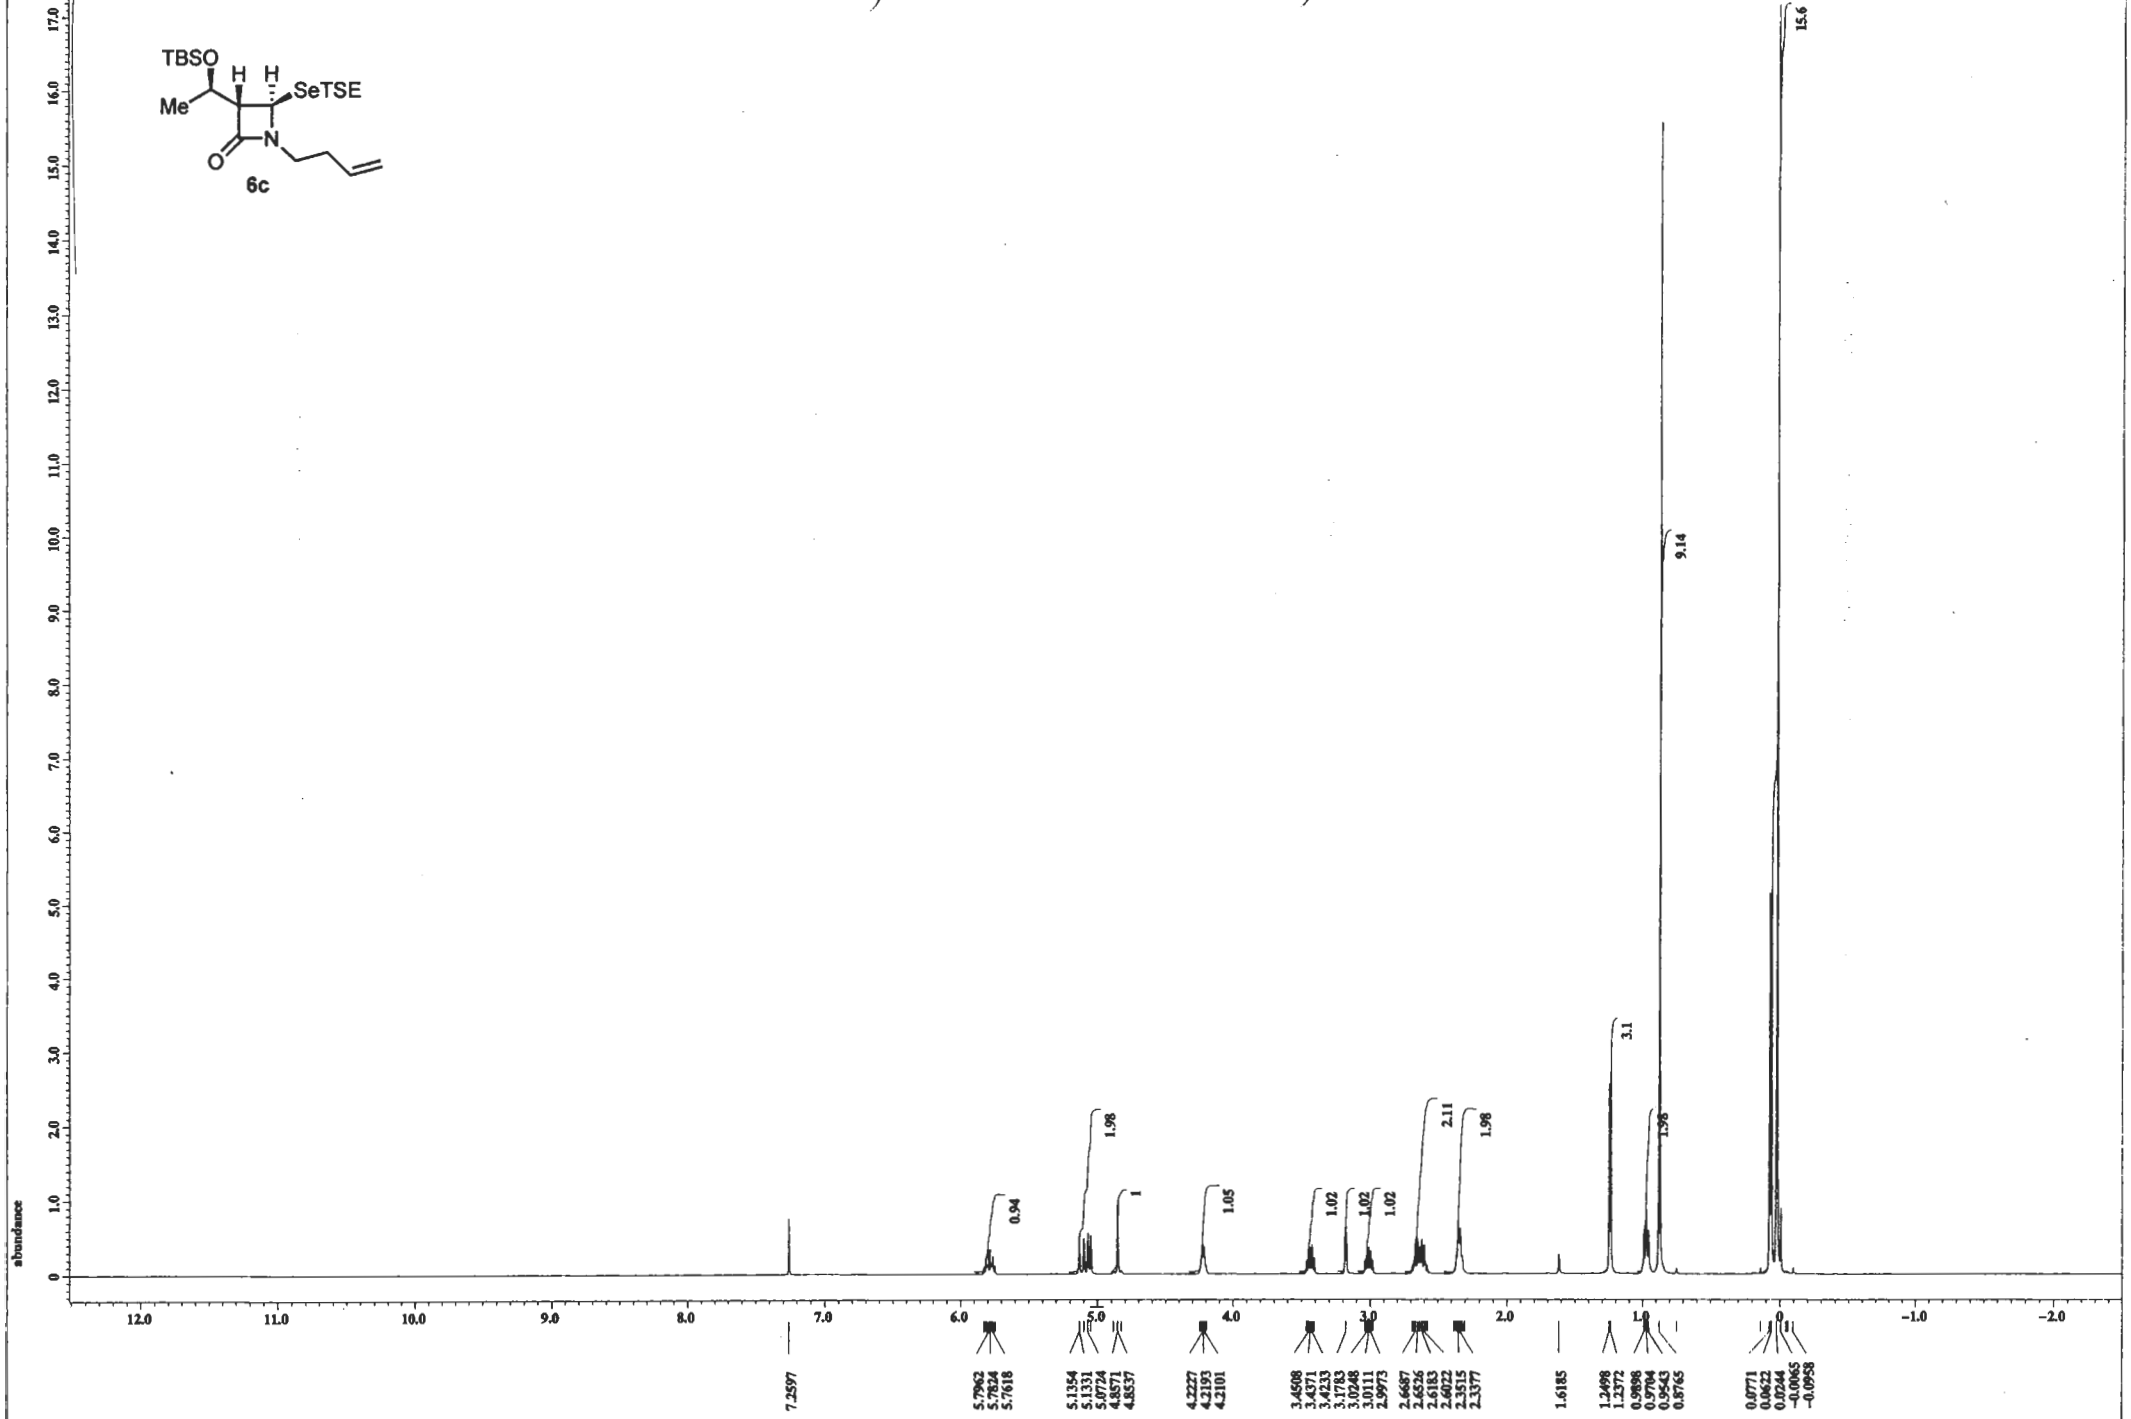

X : parts per Million : 1H

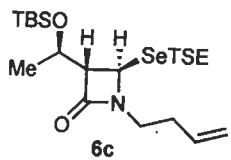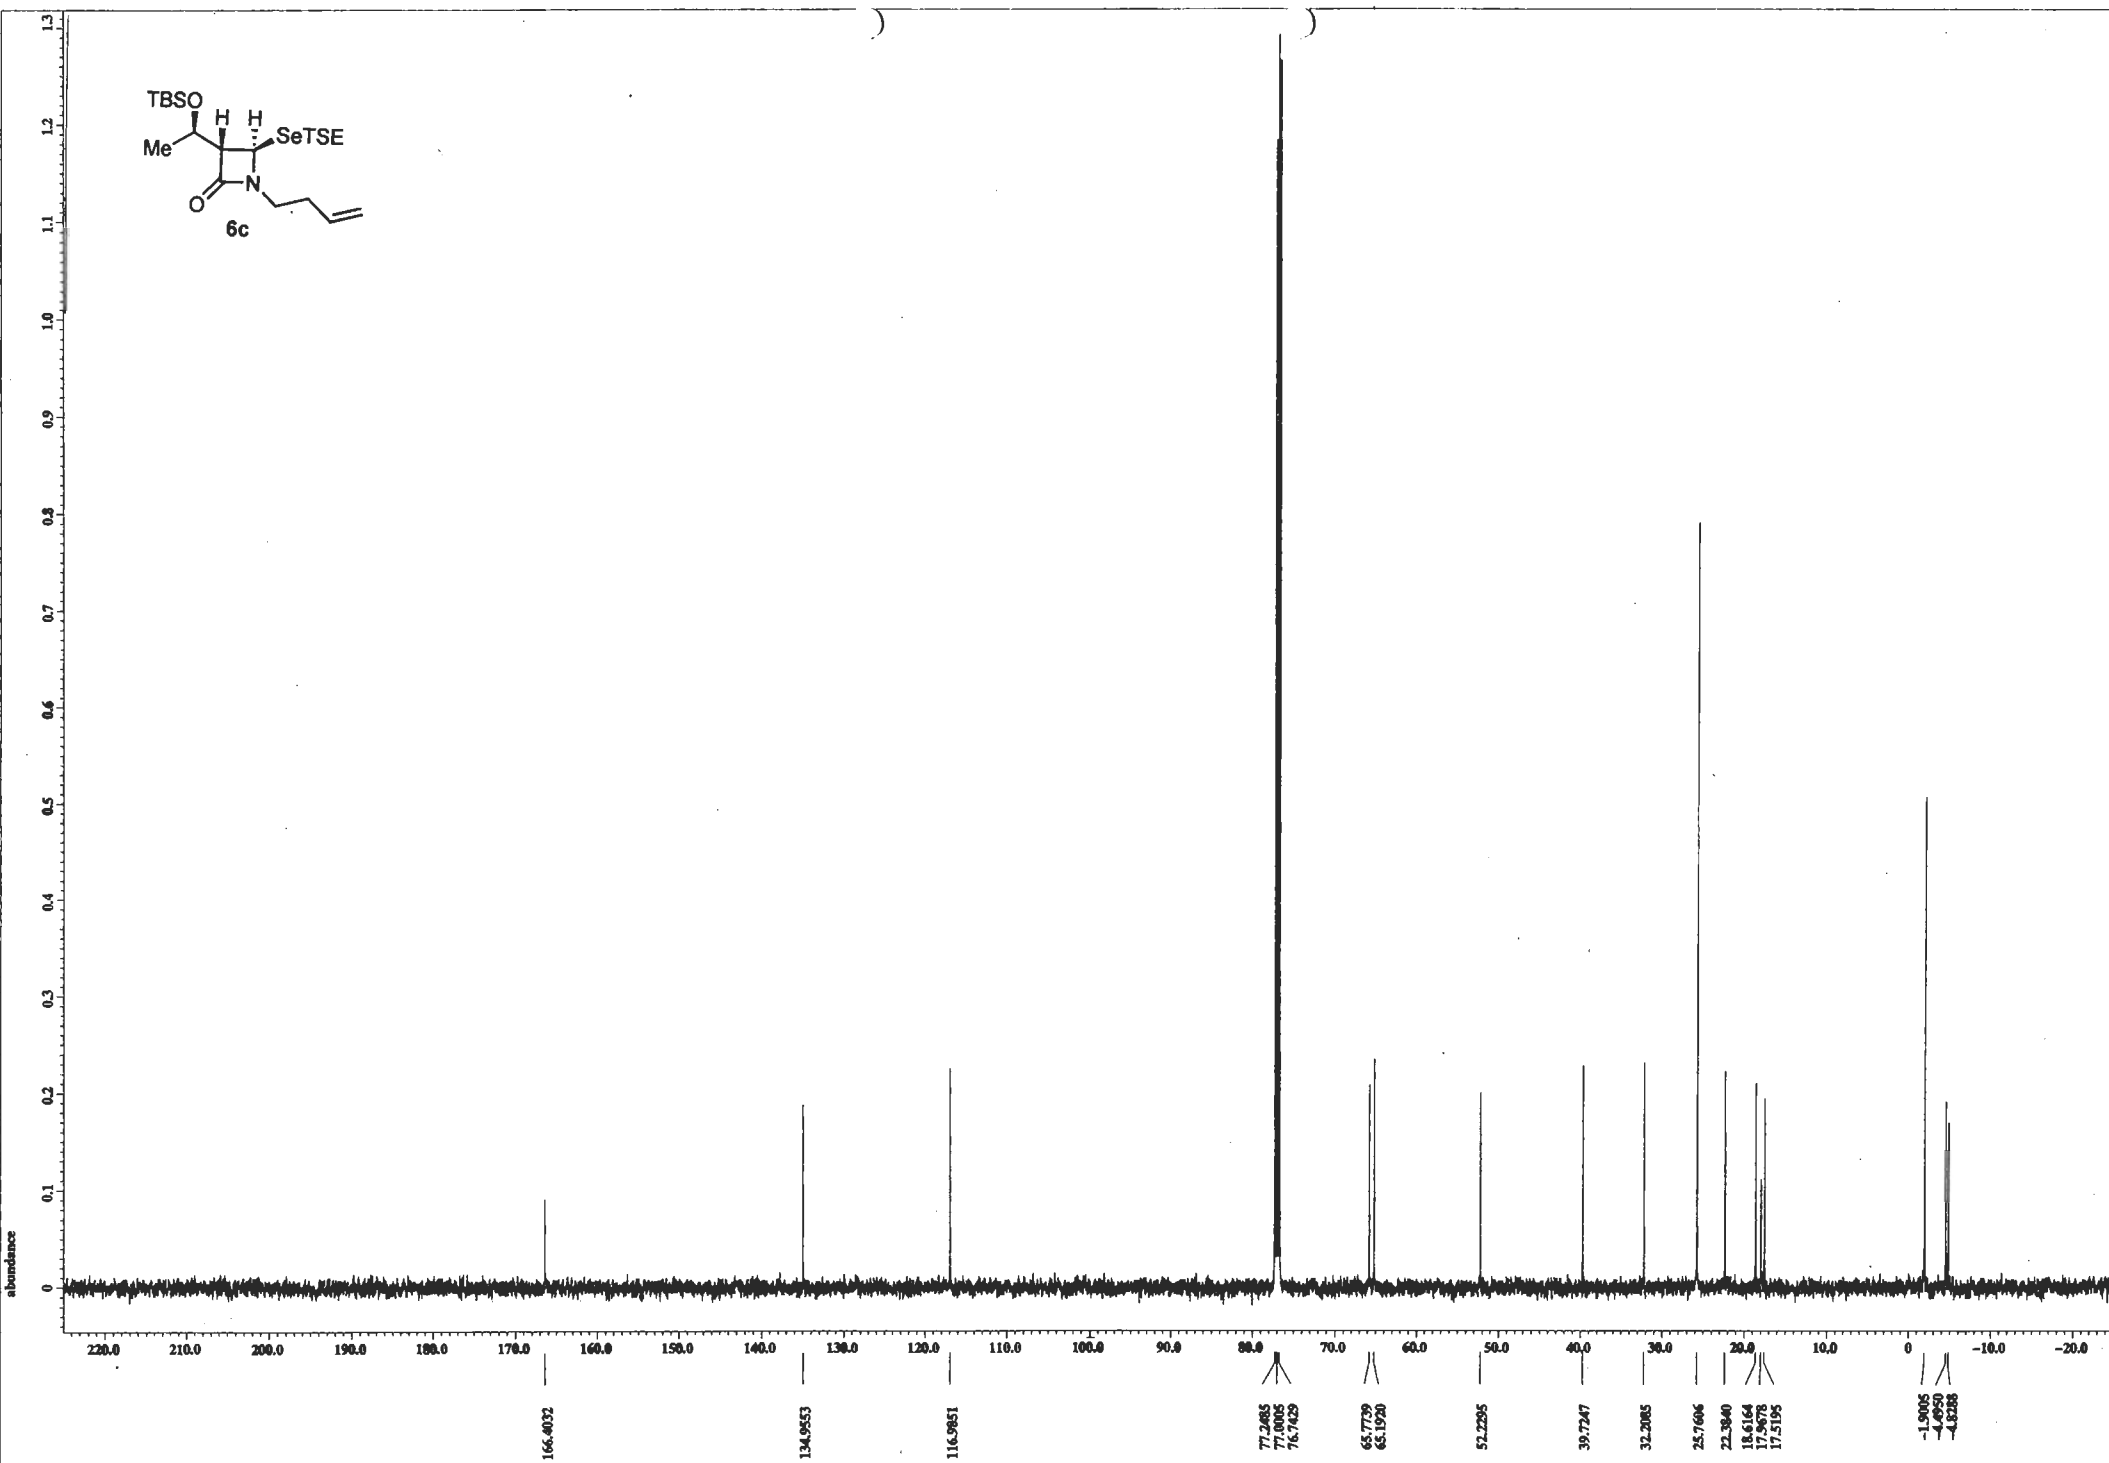

X : parts per Million : 13C

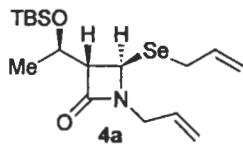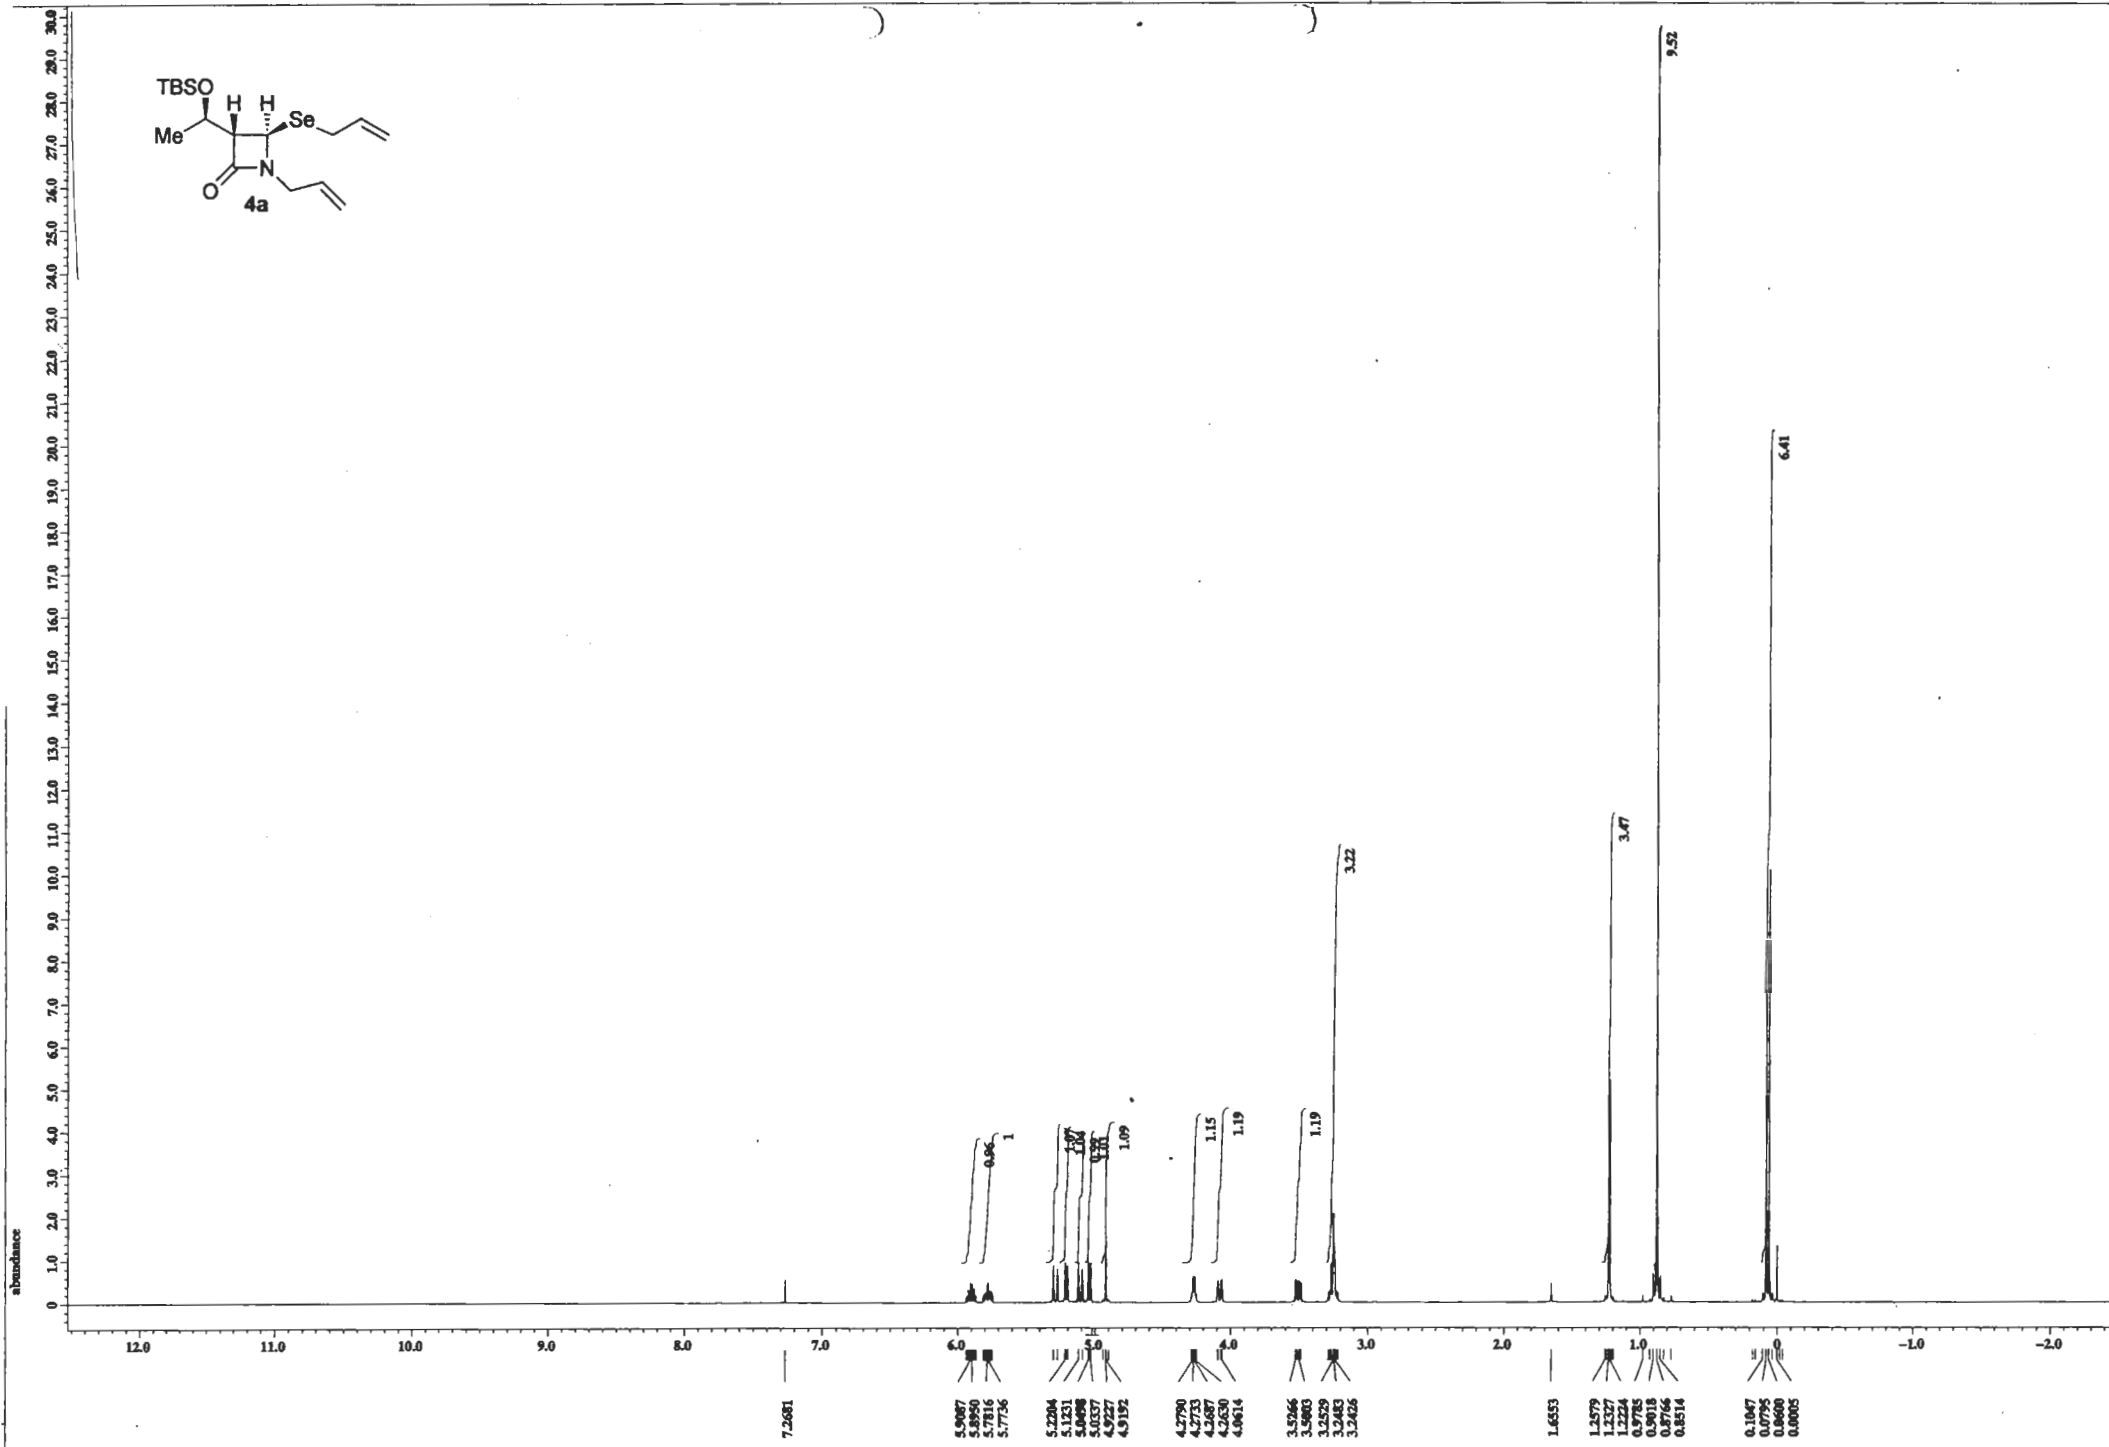

X : parts per Million : 1H



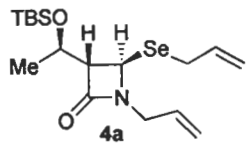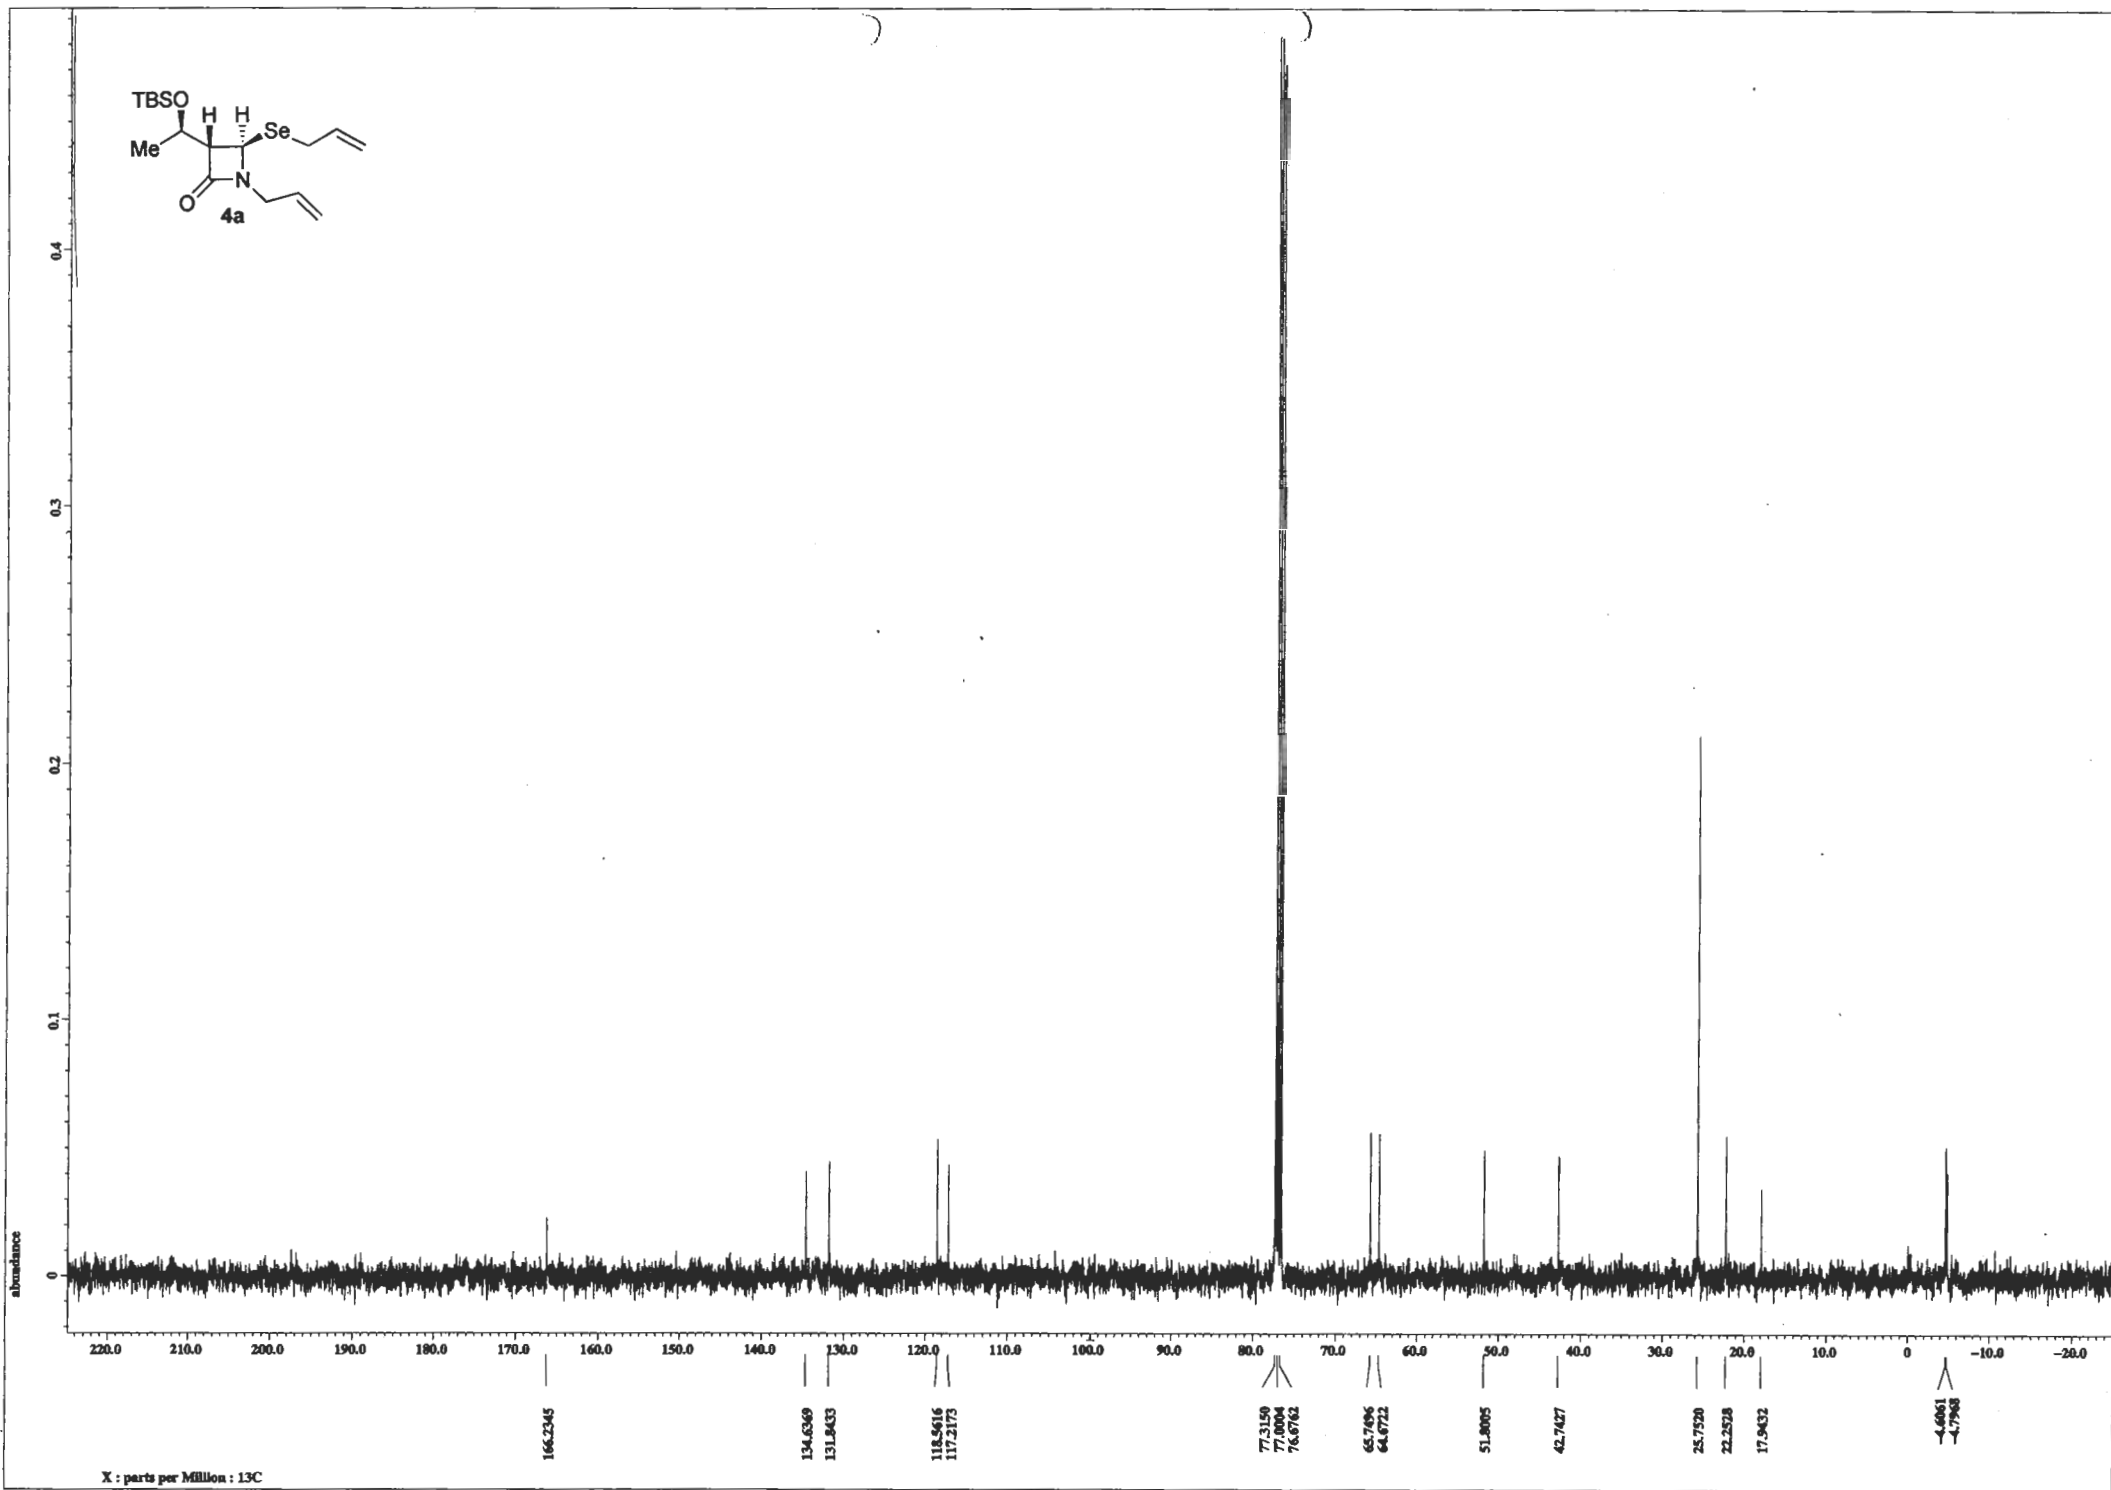

X : parts per Million : 13C

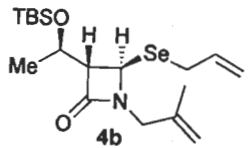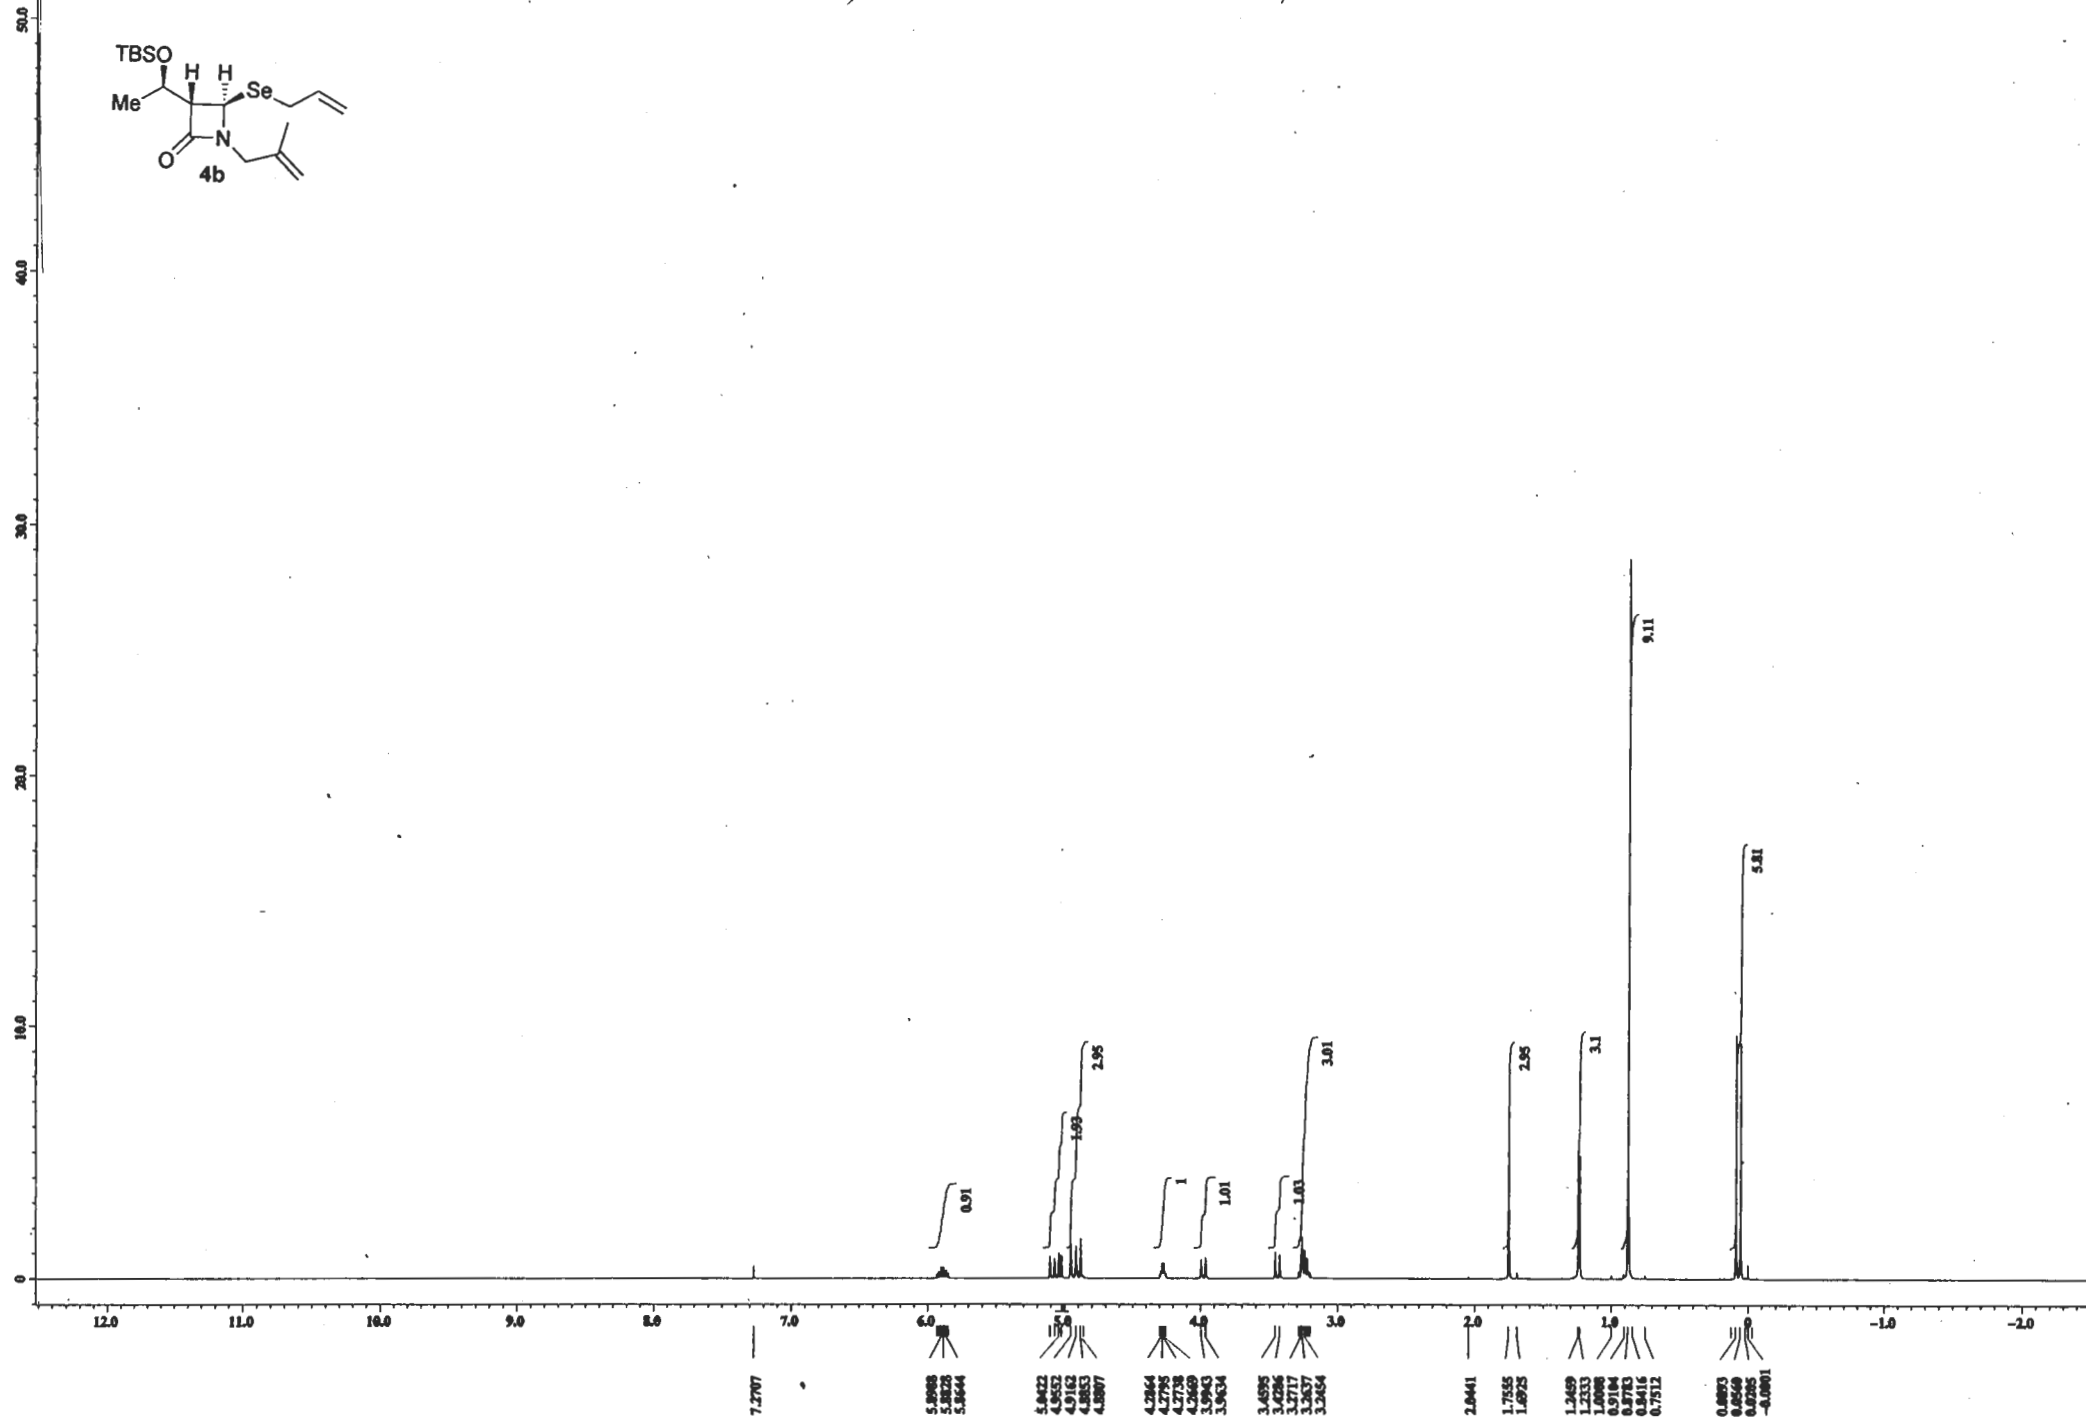

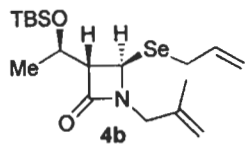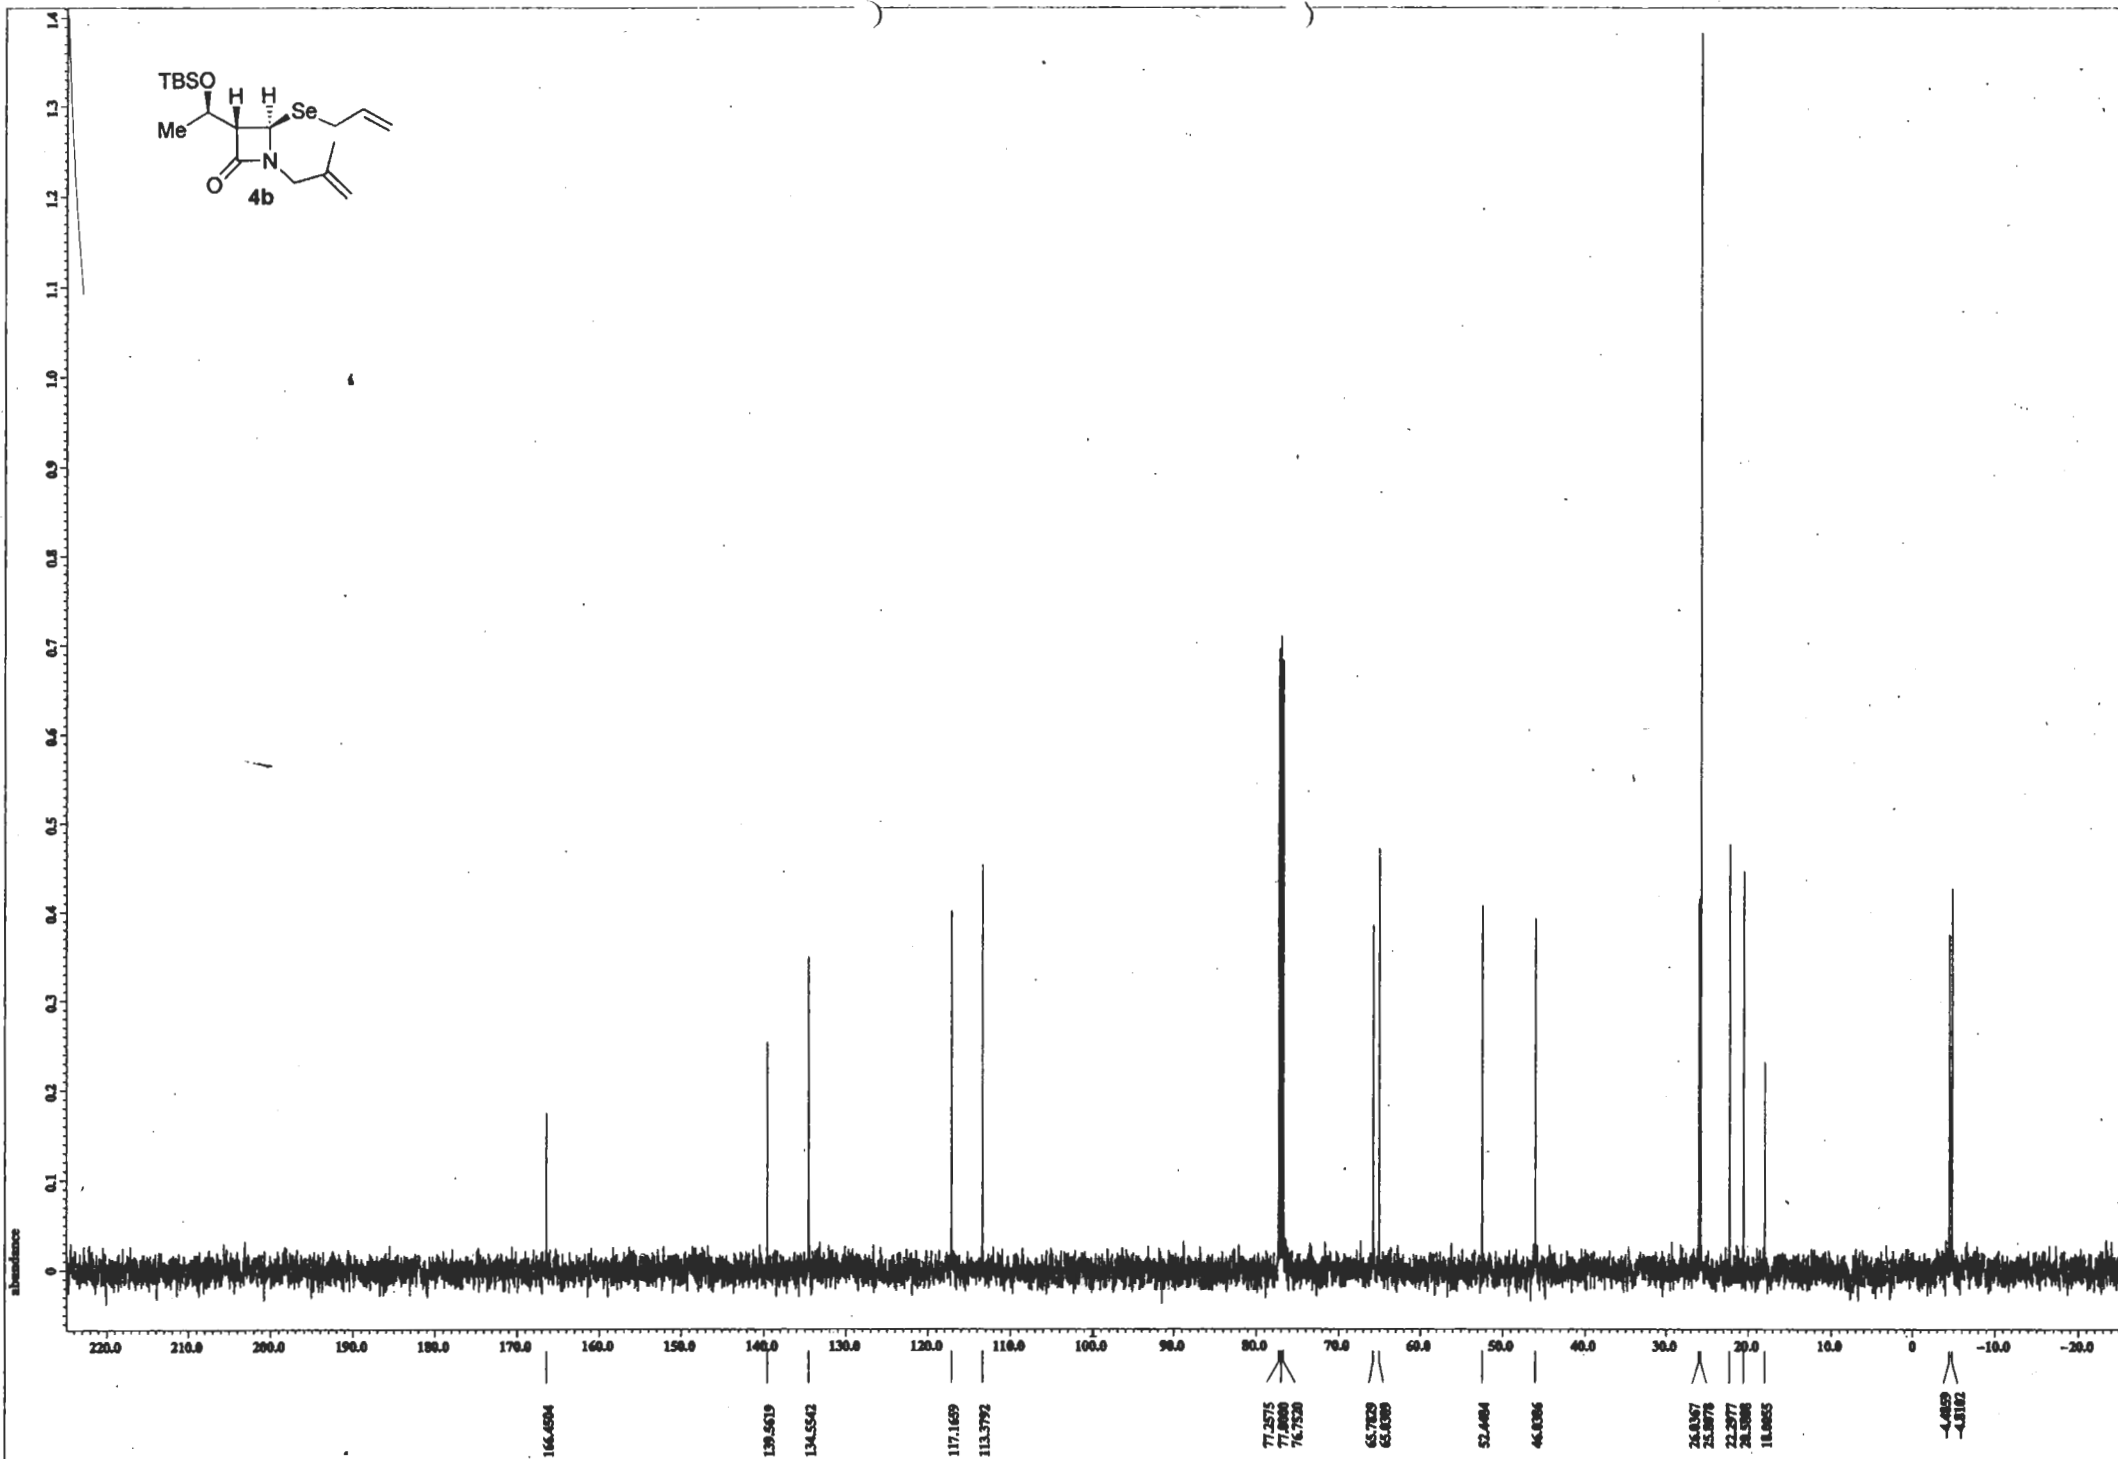

X : parts per Million : 13C

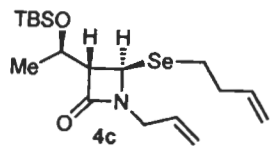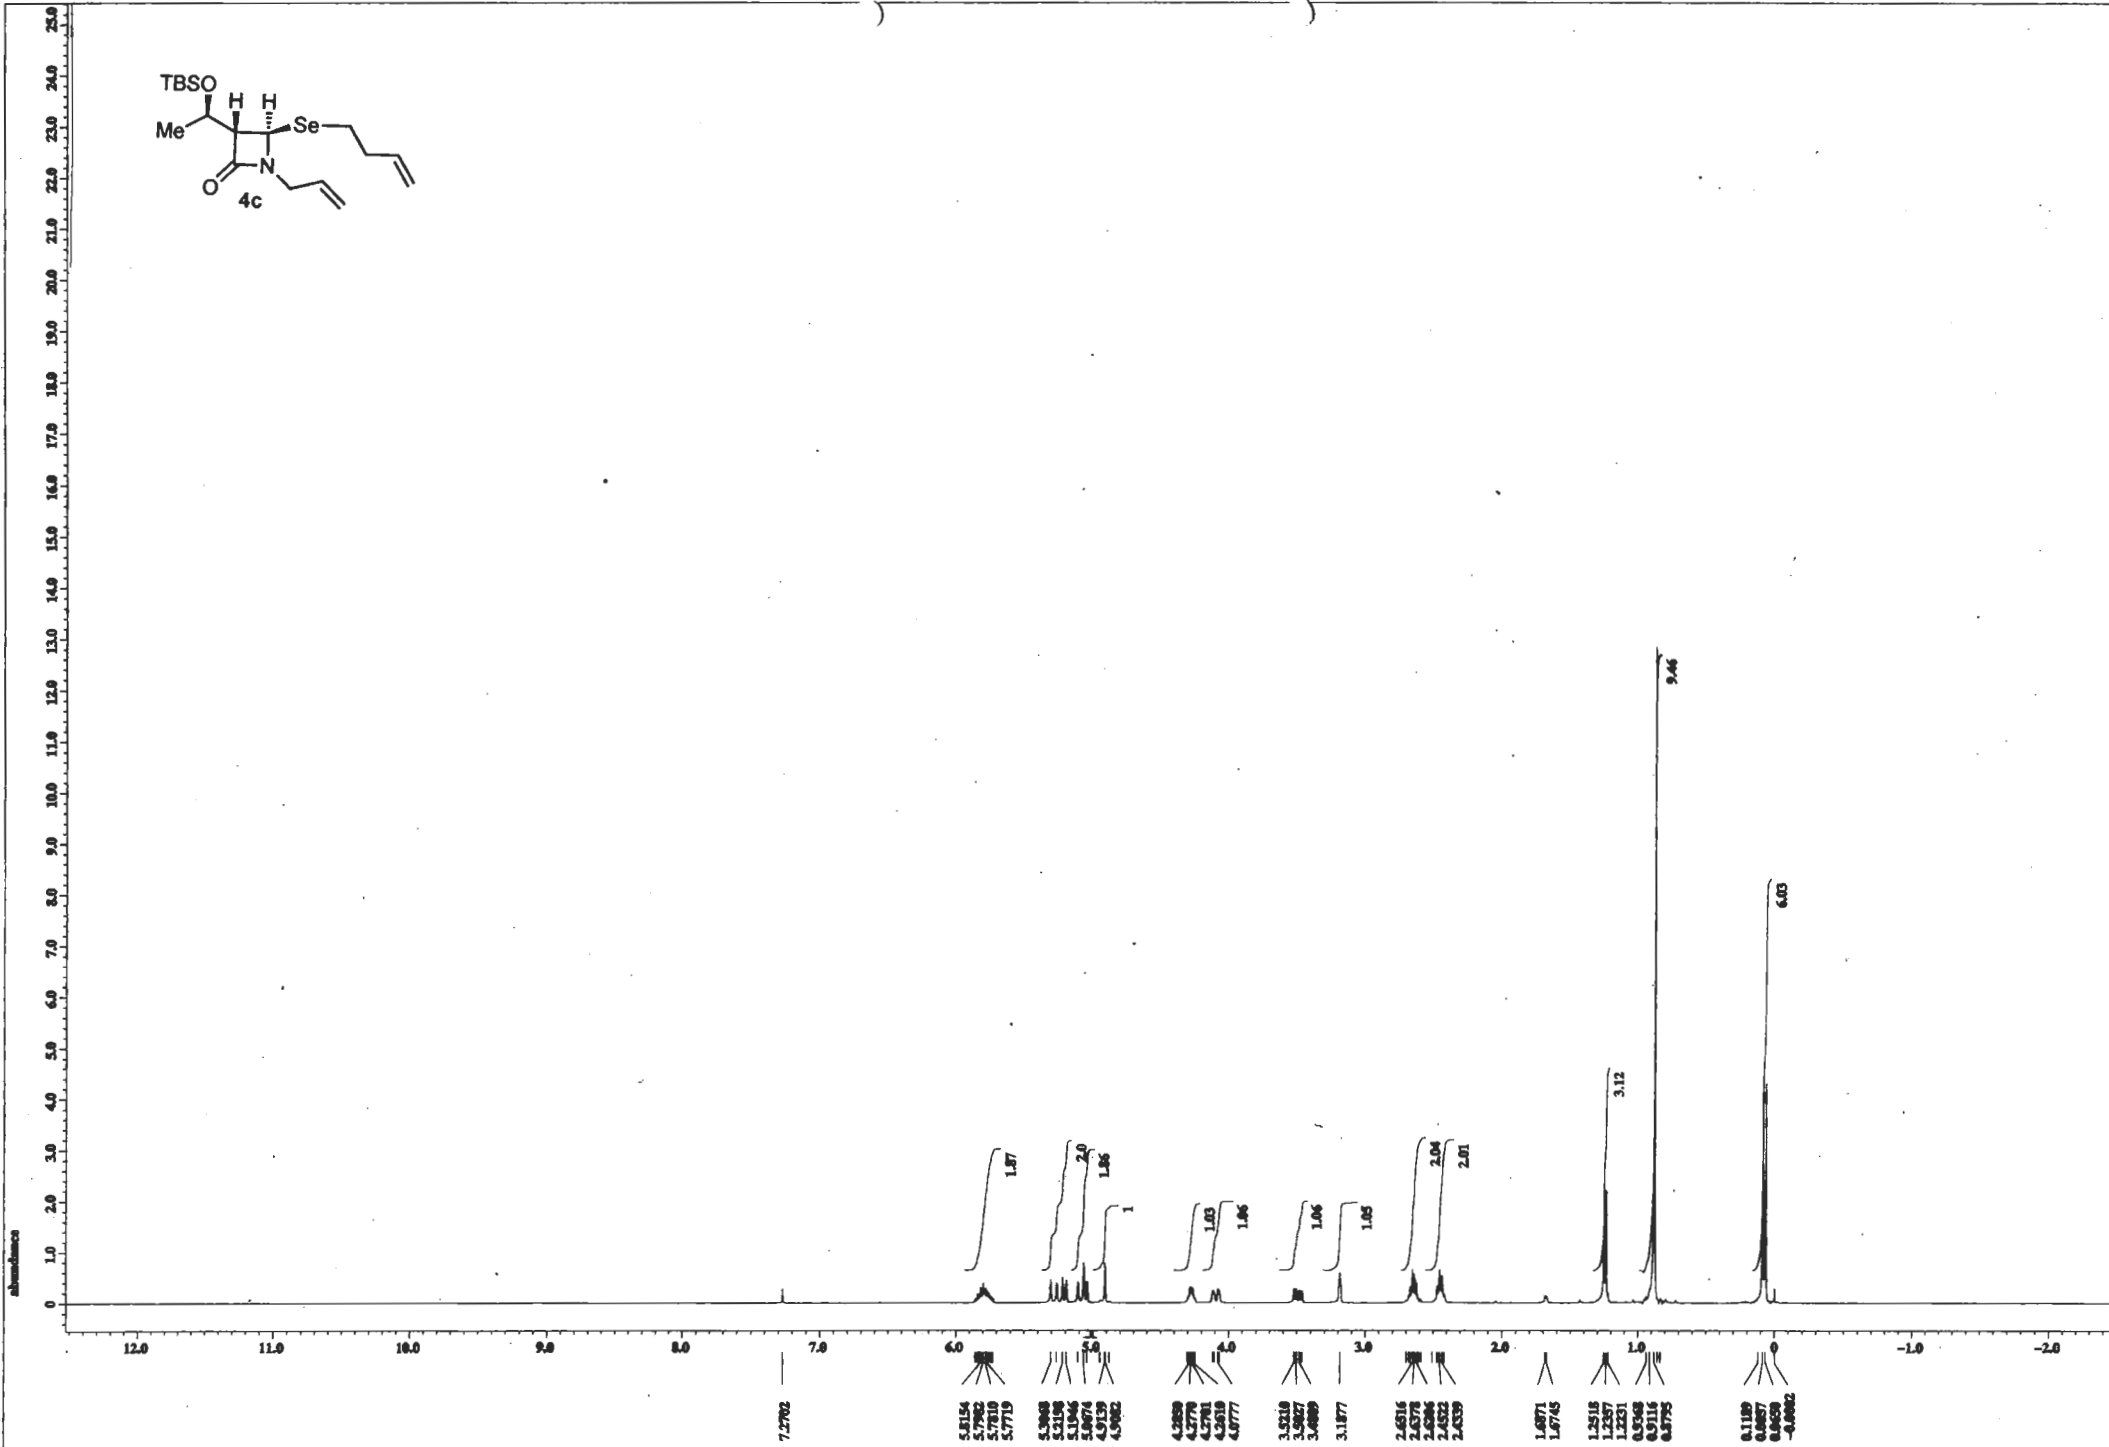

X : parts per Million : 1H

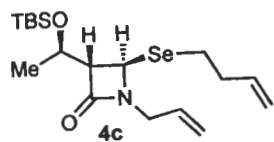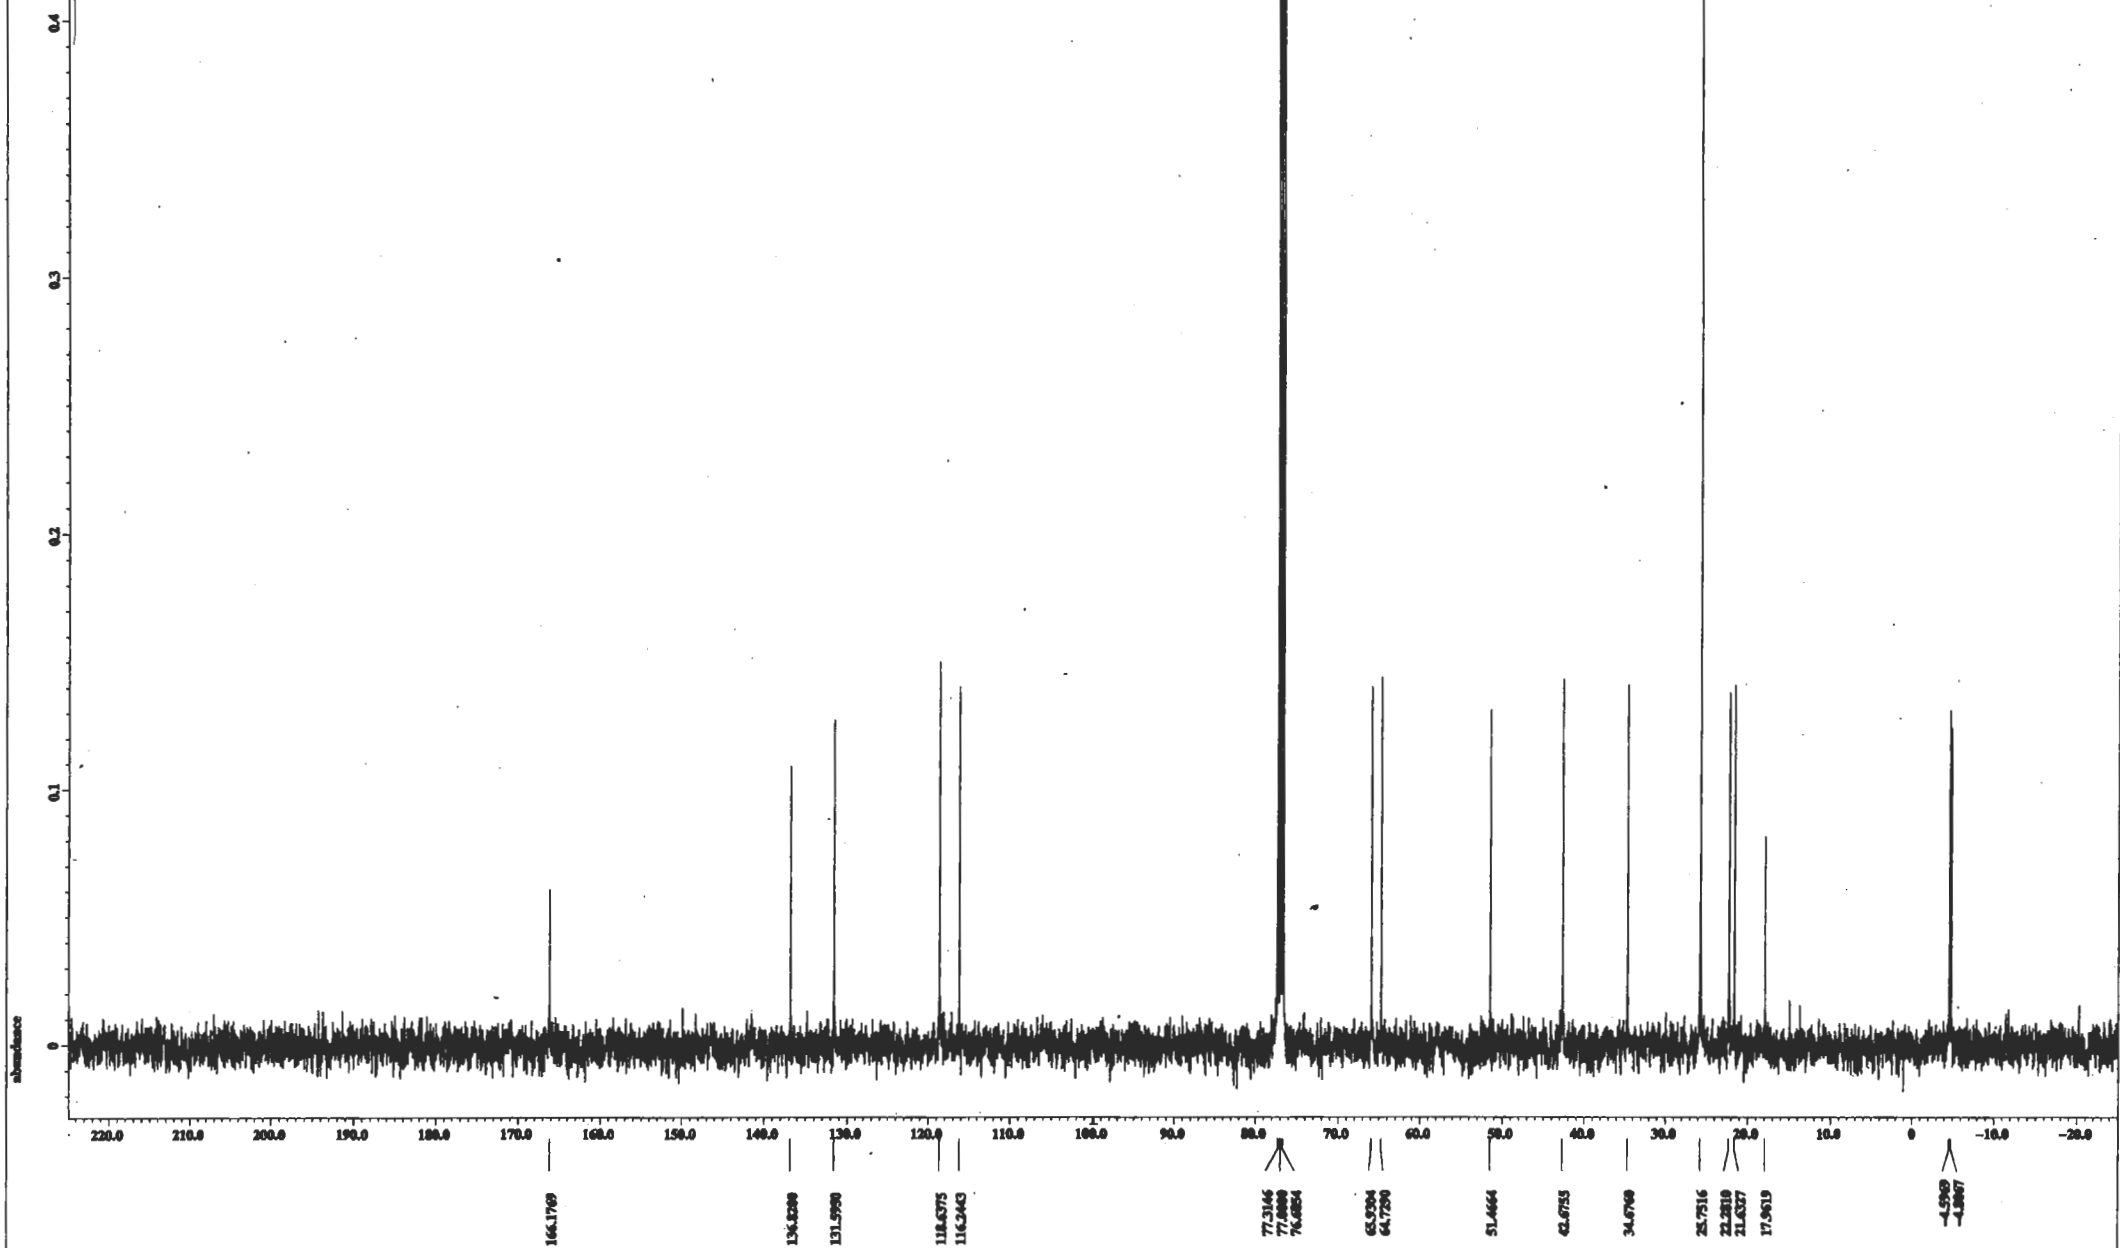

X : parts per Million : 13C

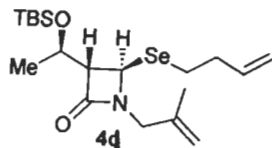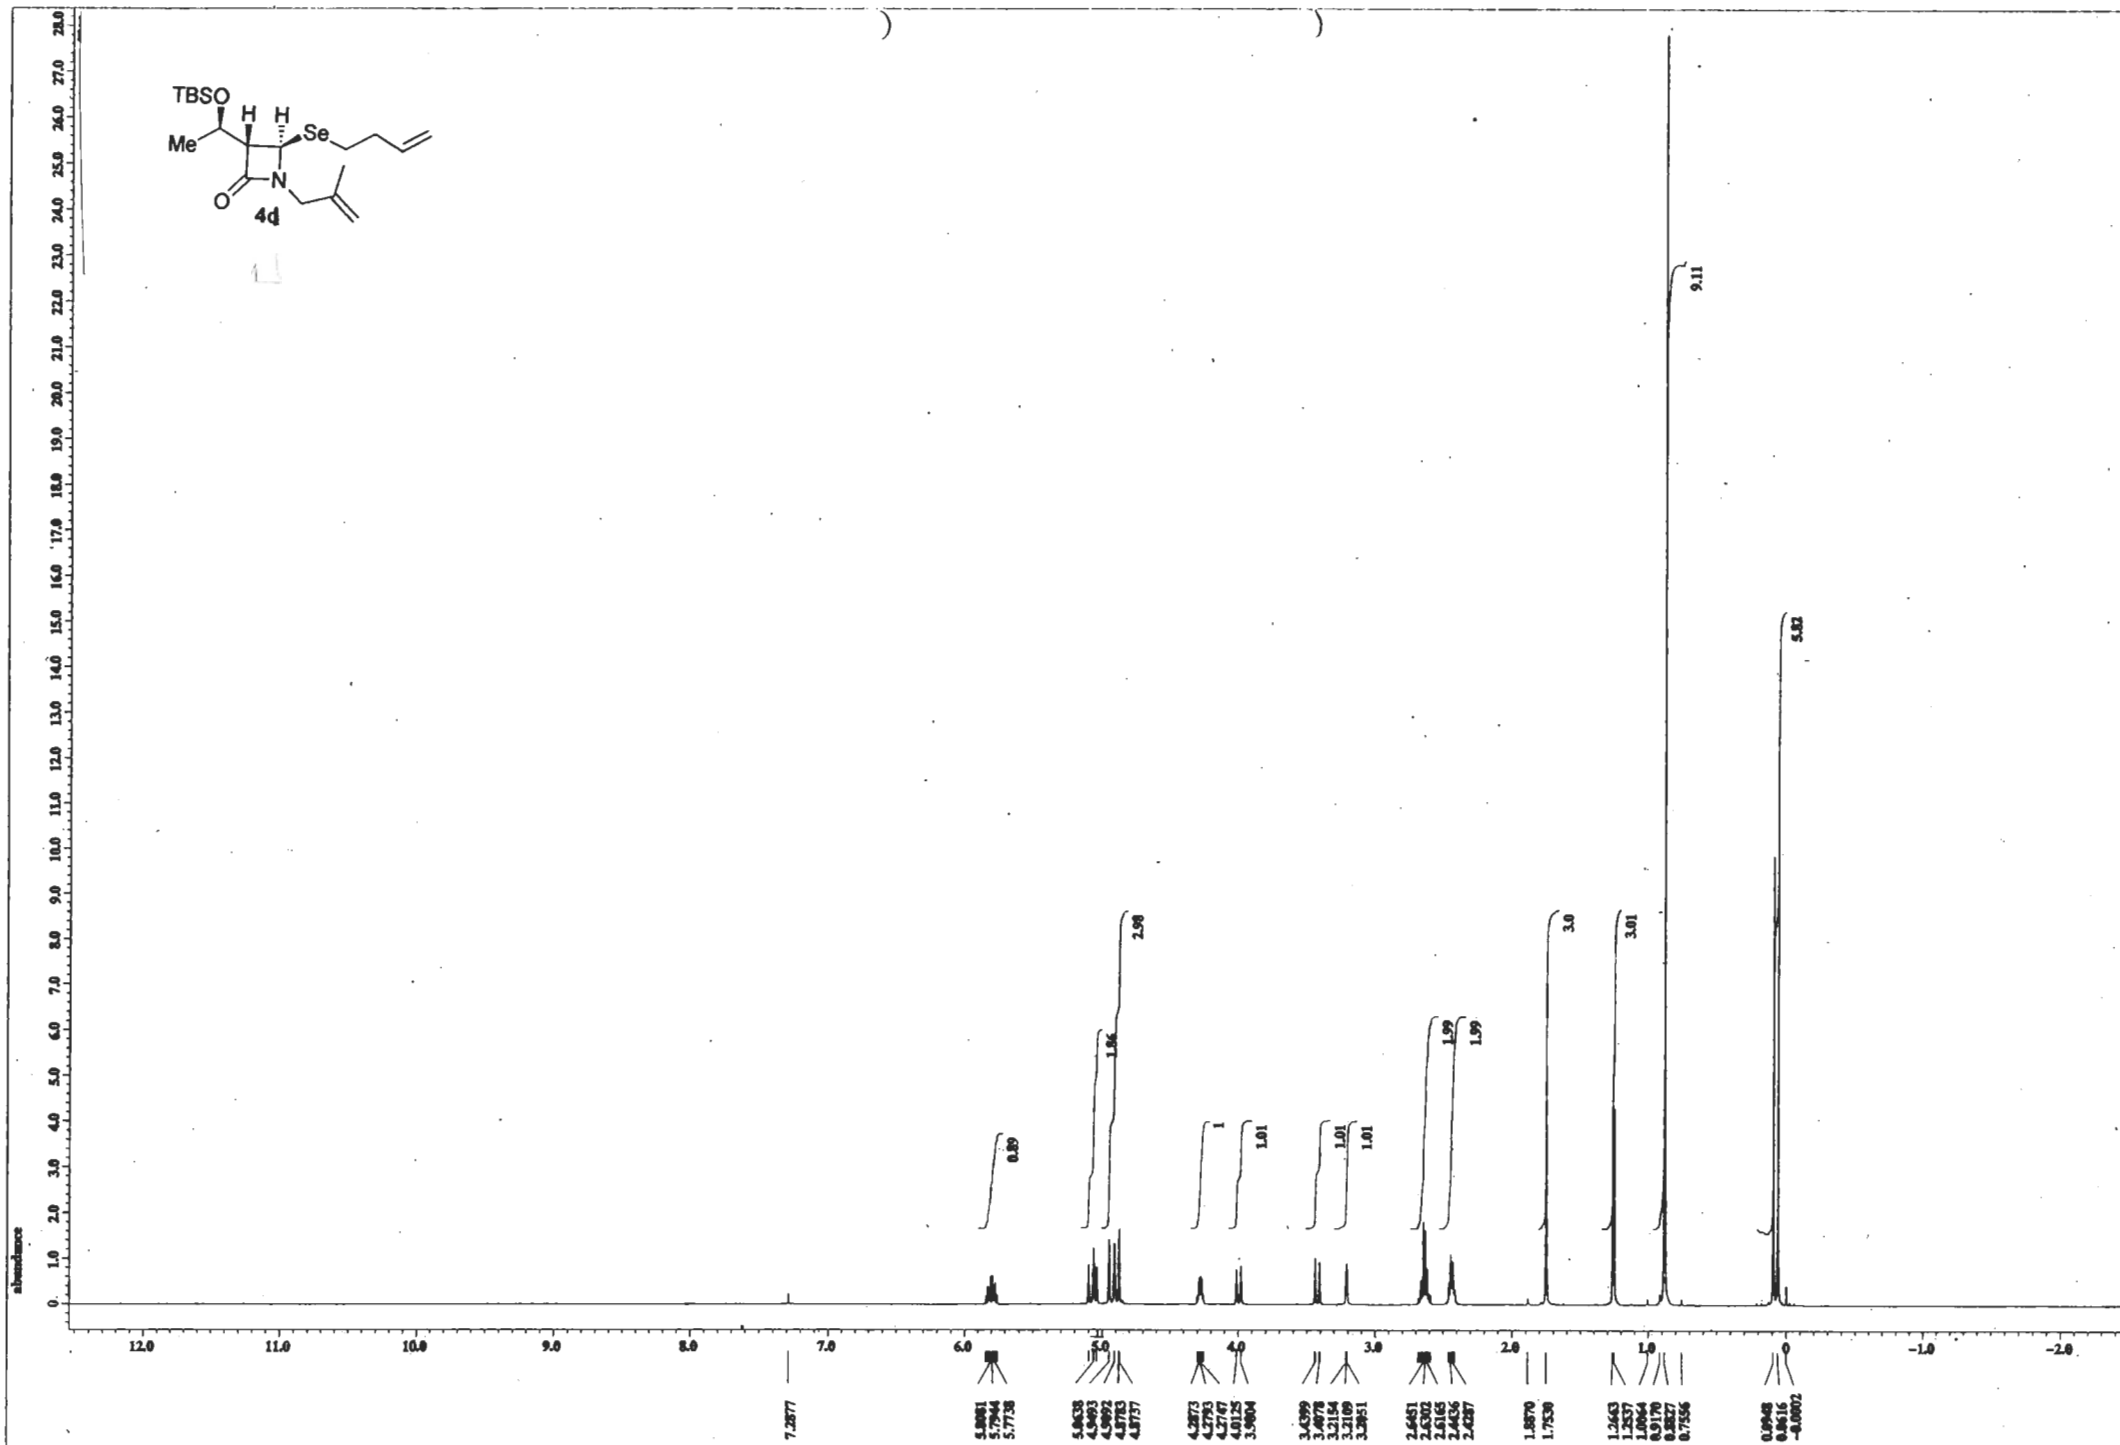

X : parts per Million : 1H

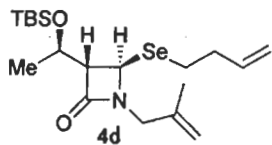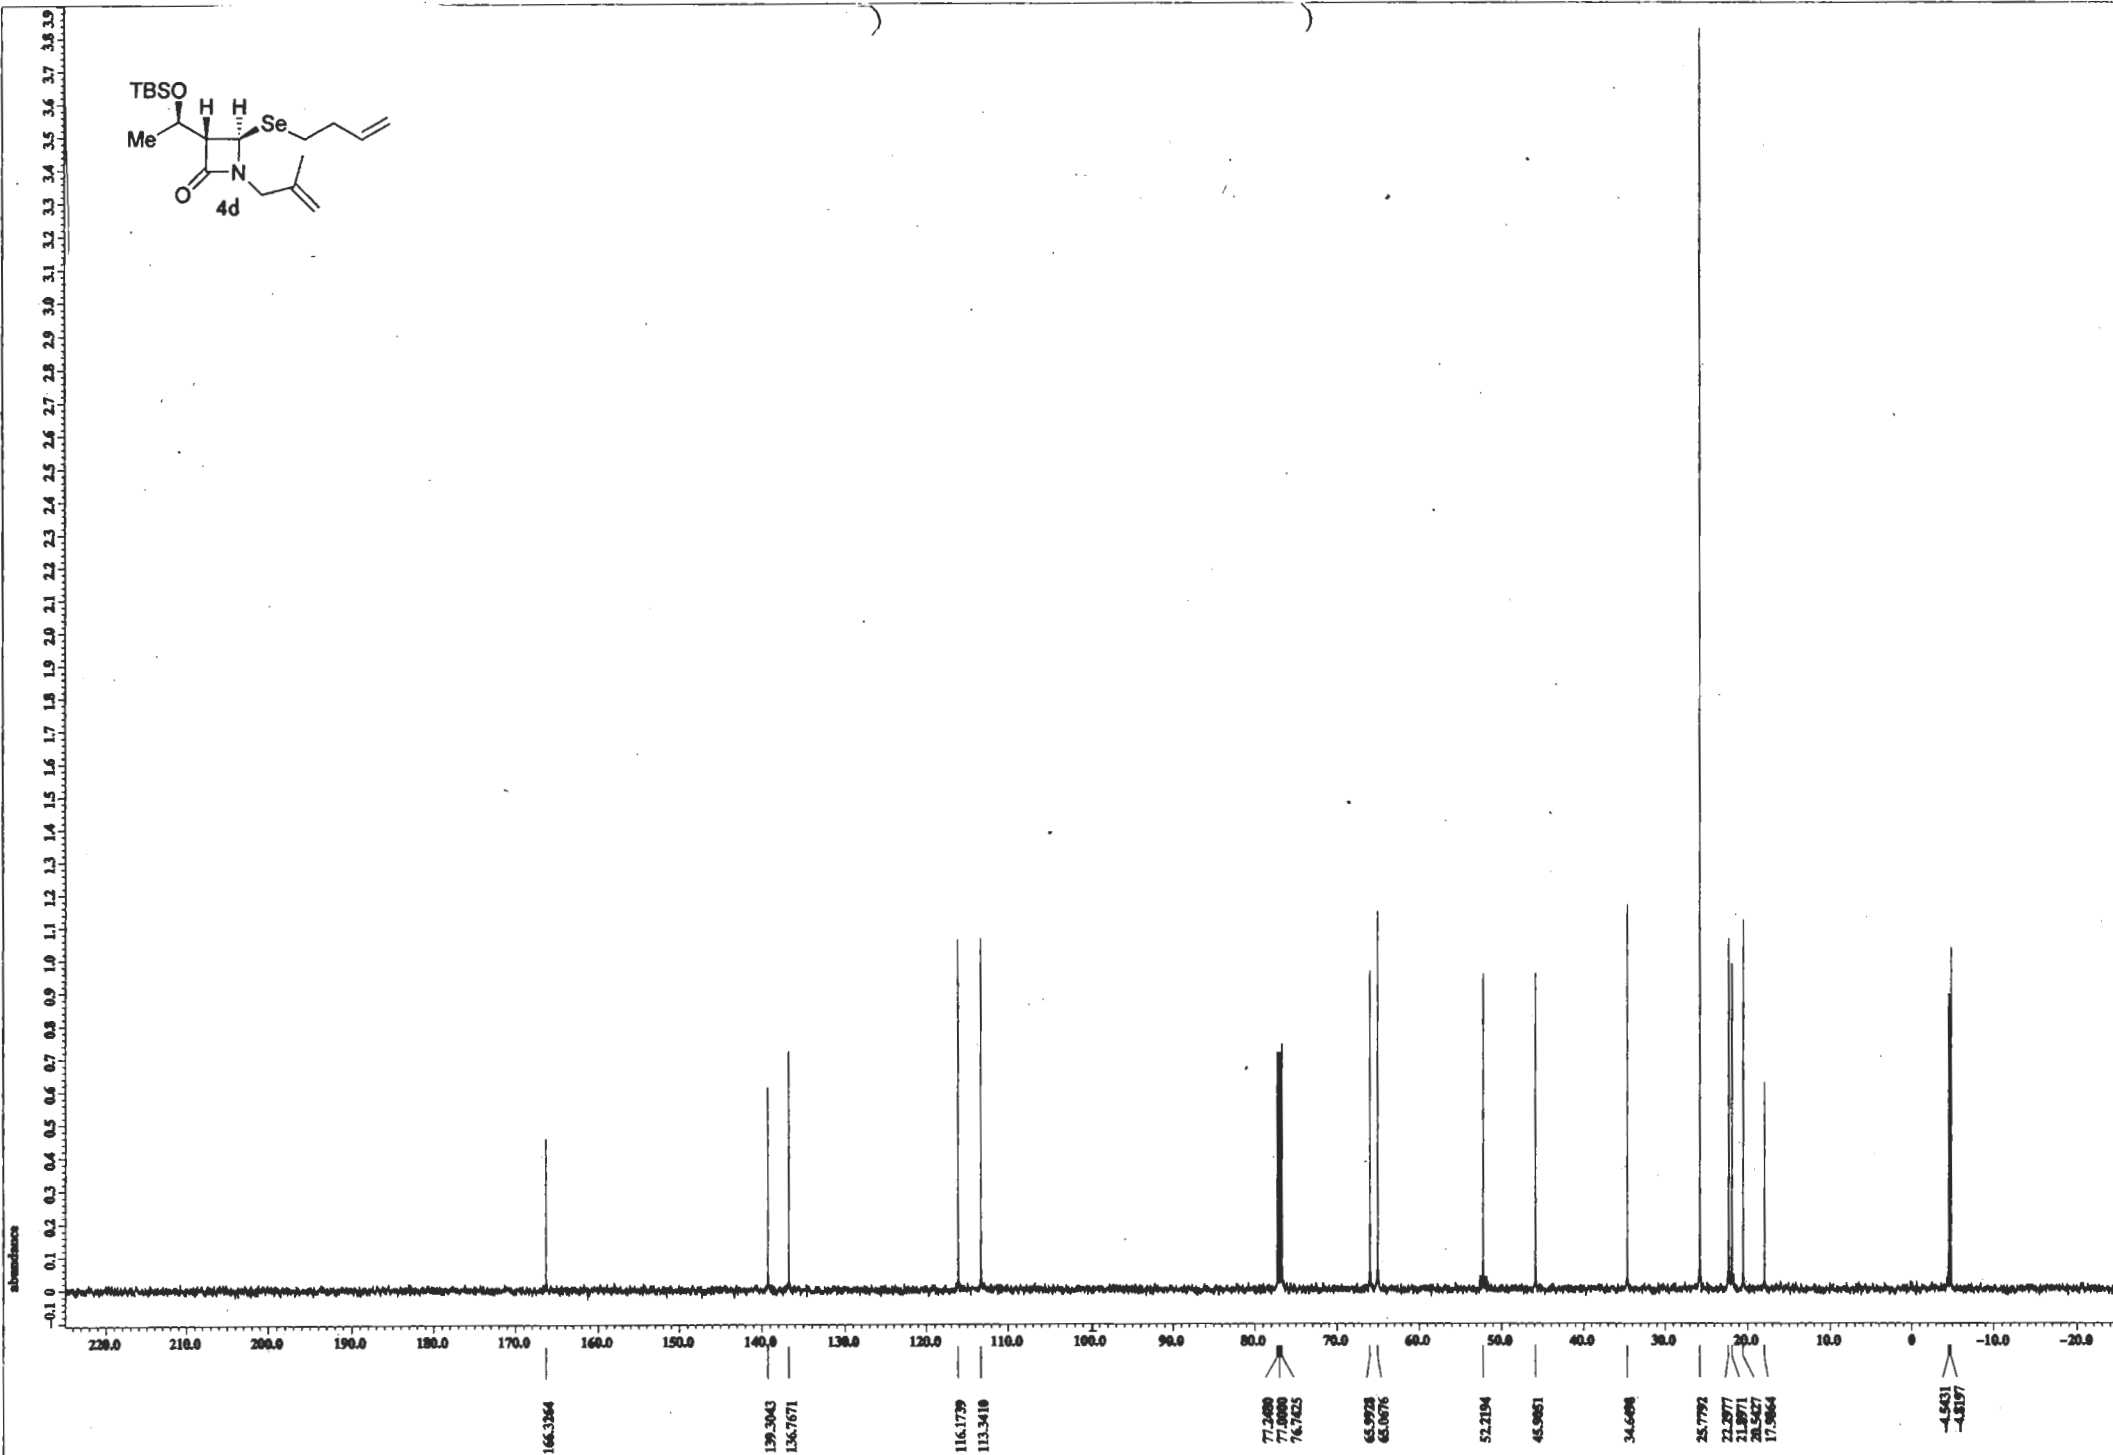

X : parts per Million : 13C

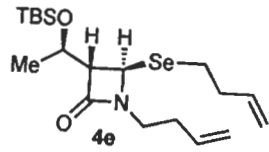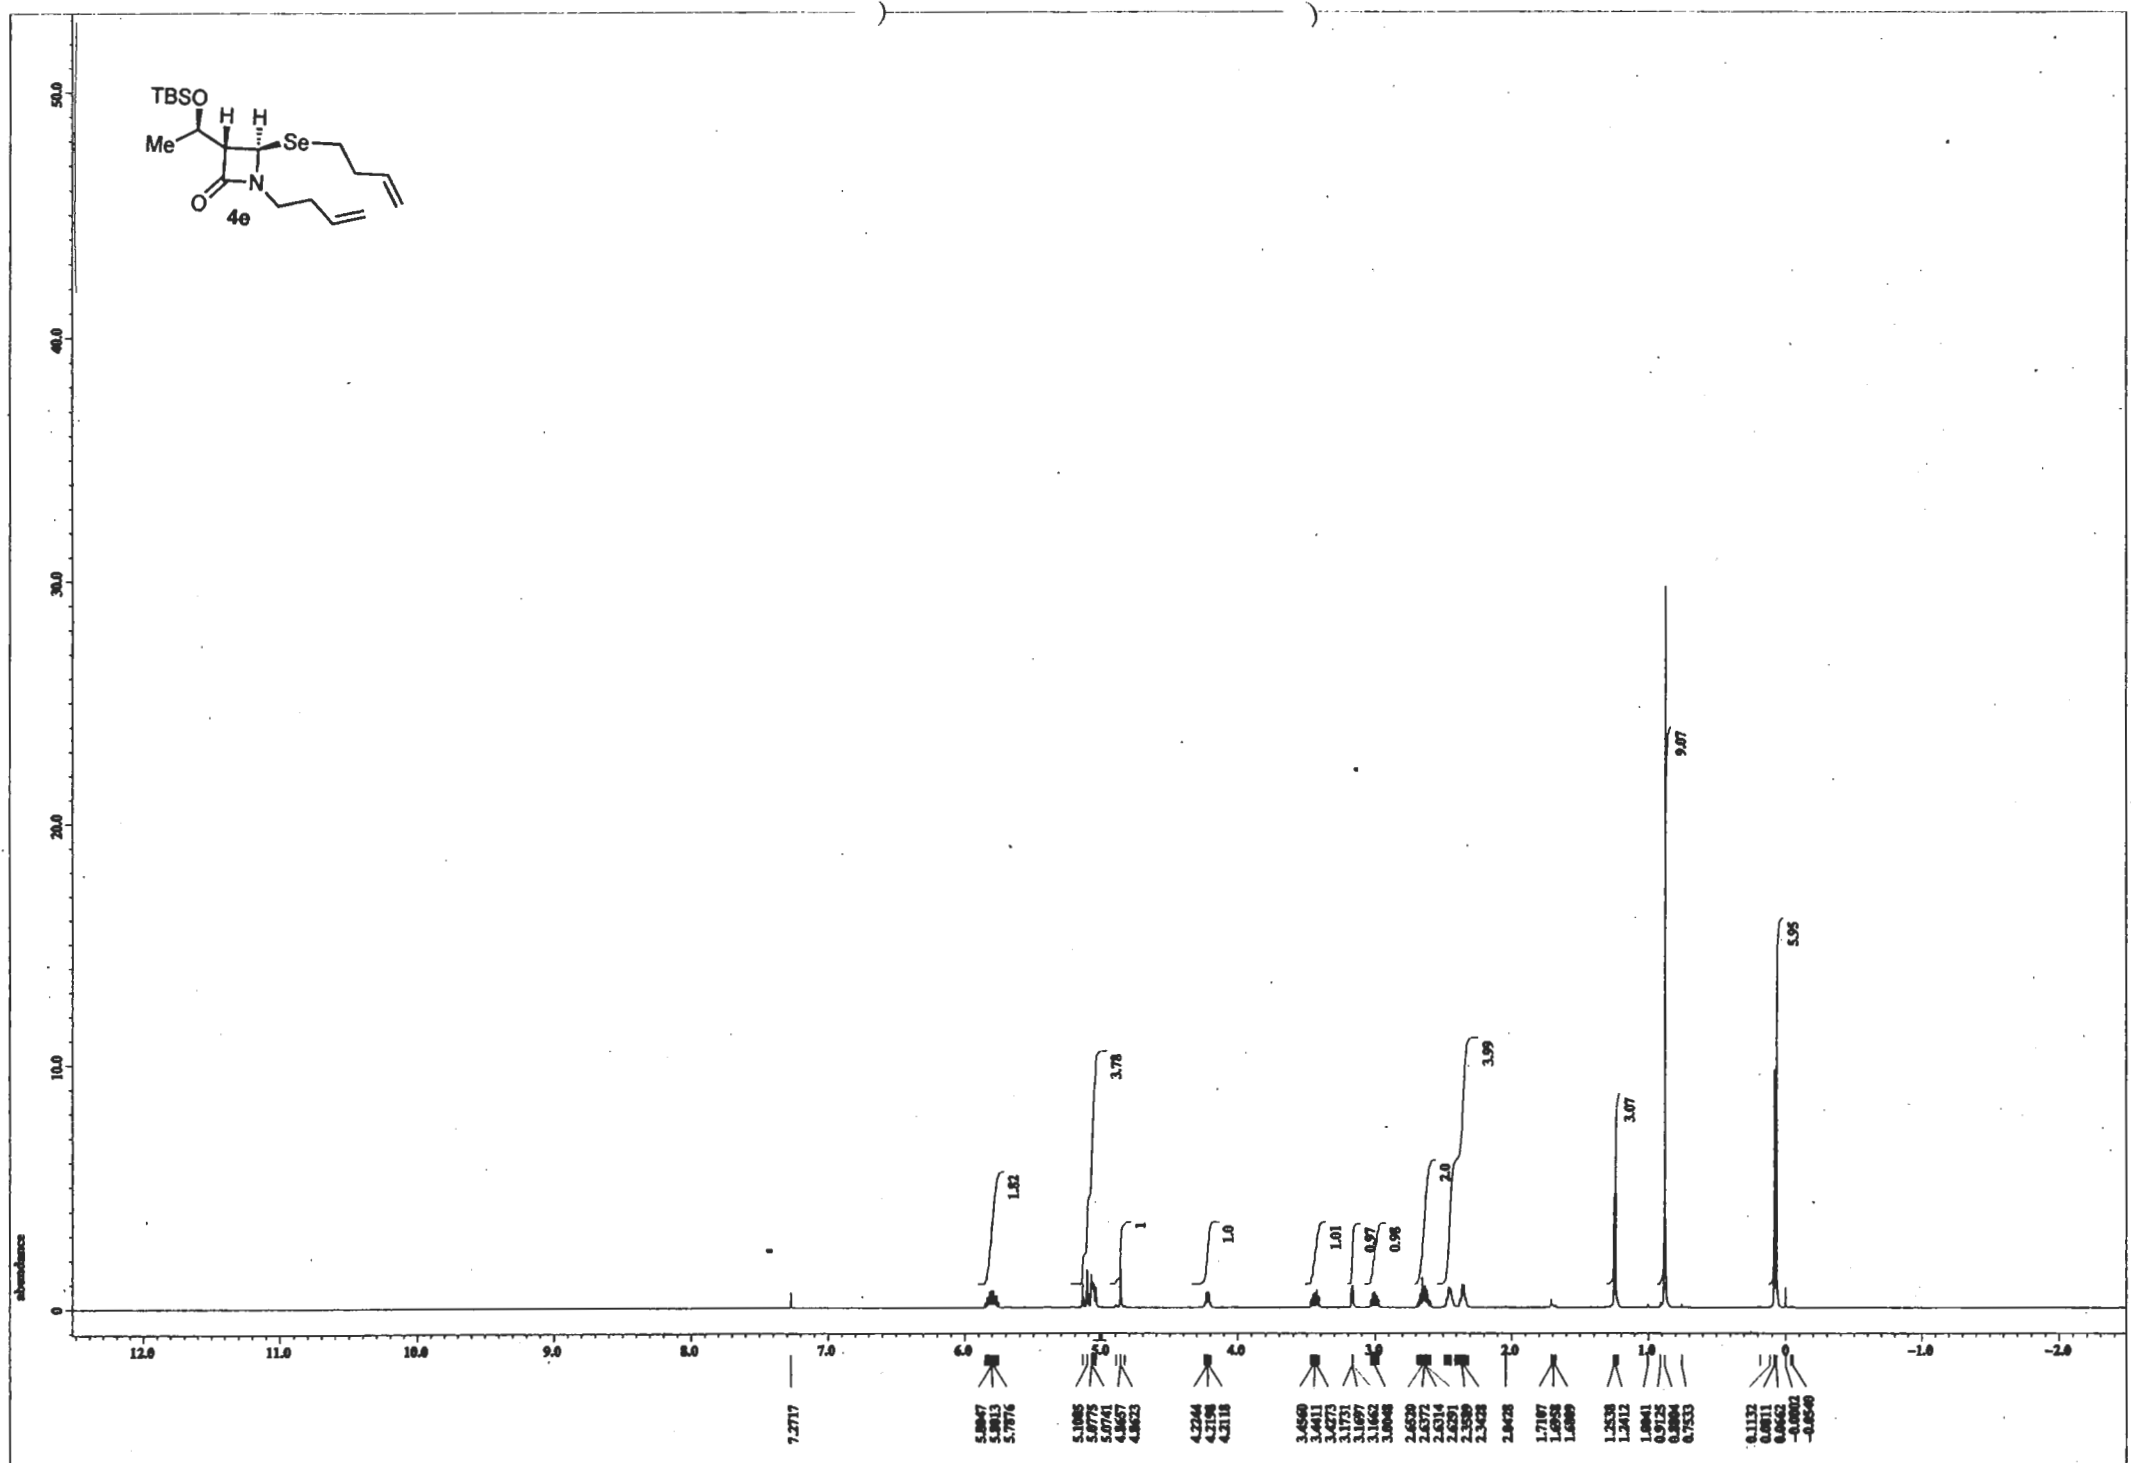

X : parts per Million : 1H



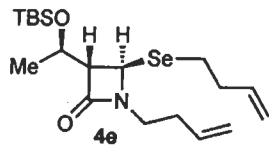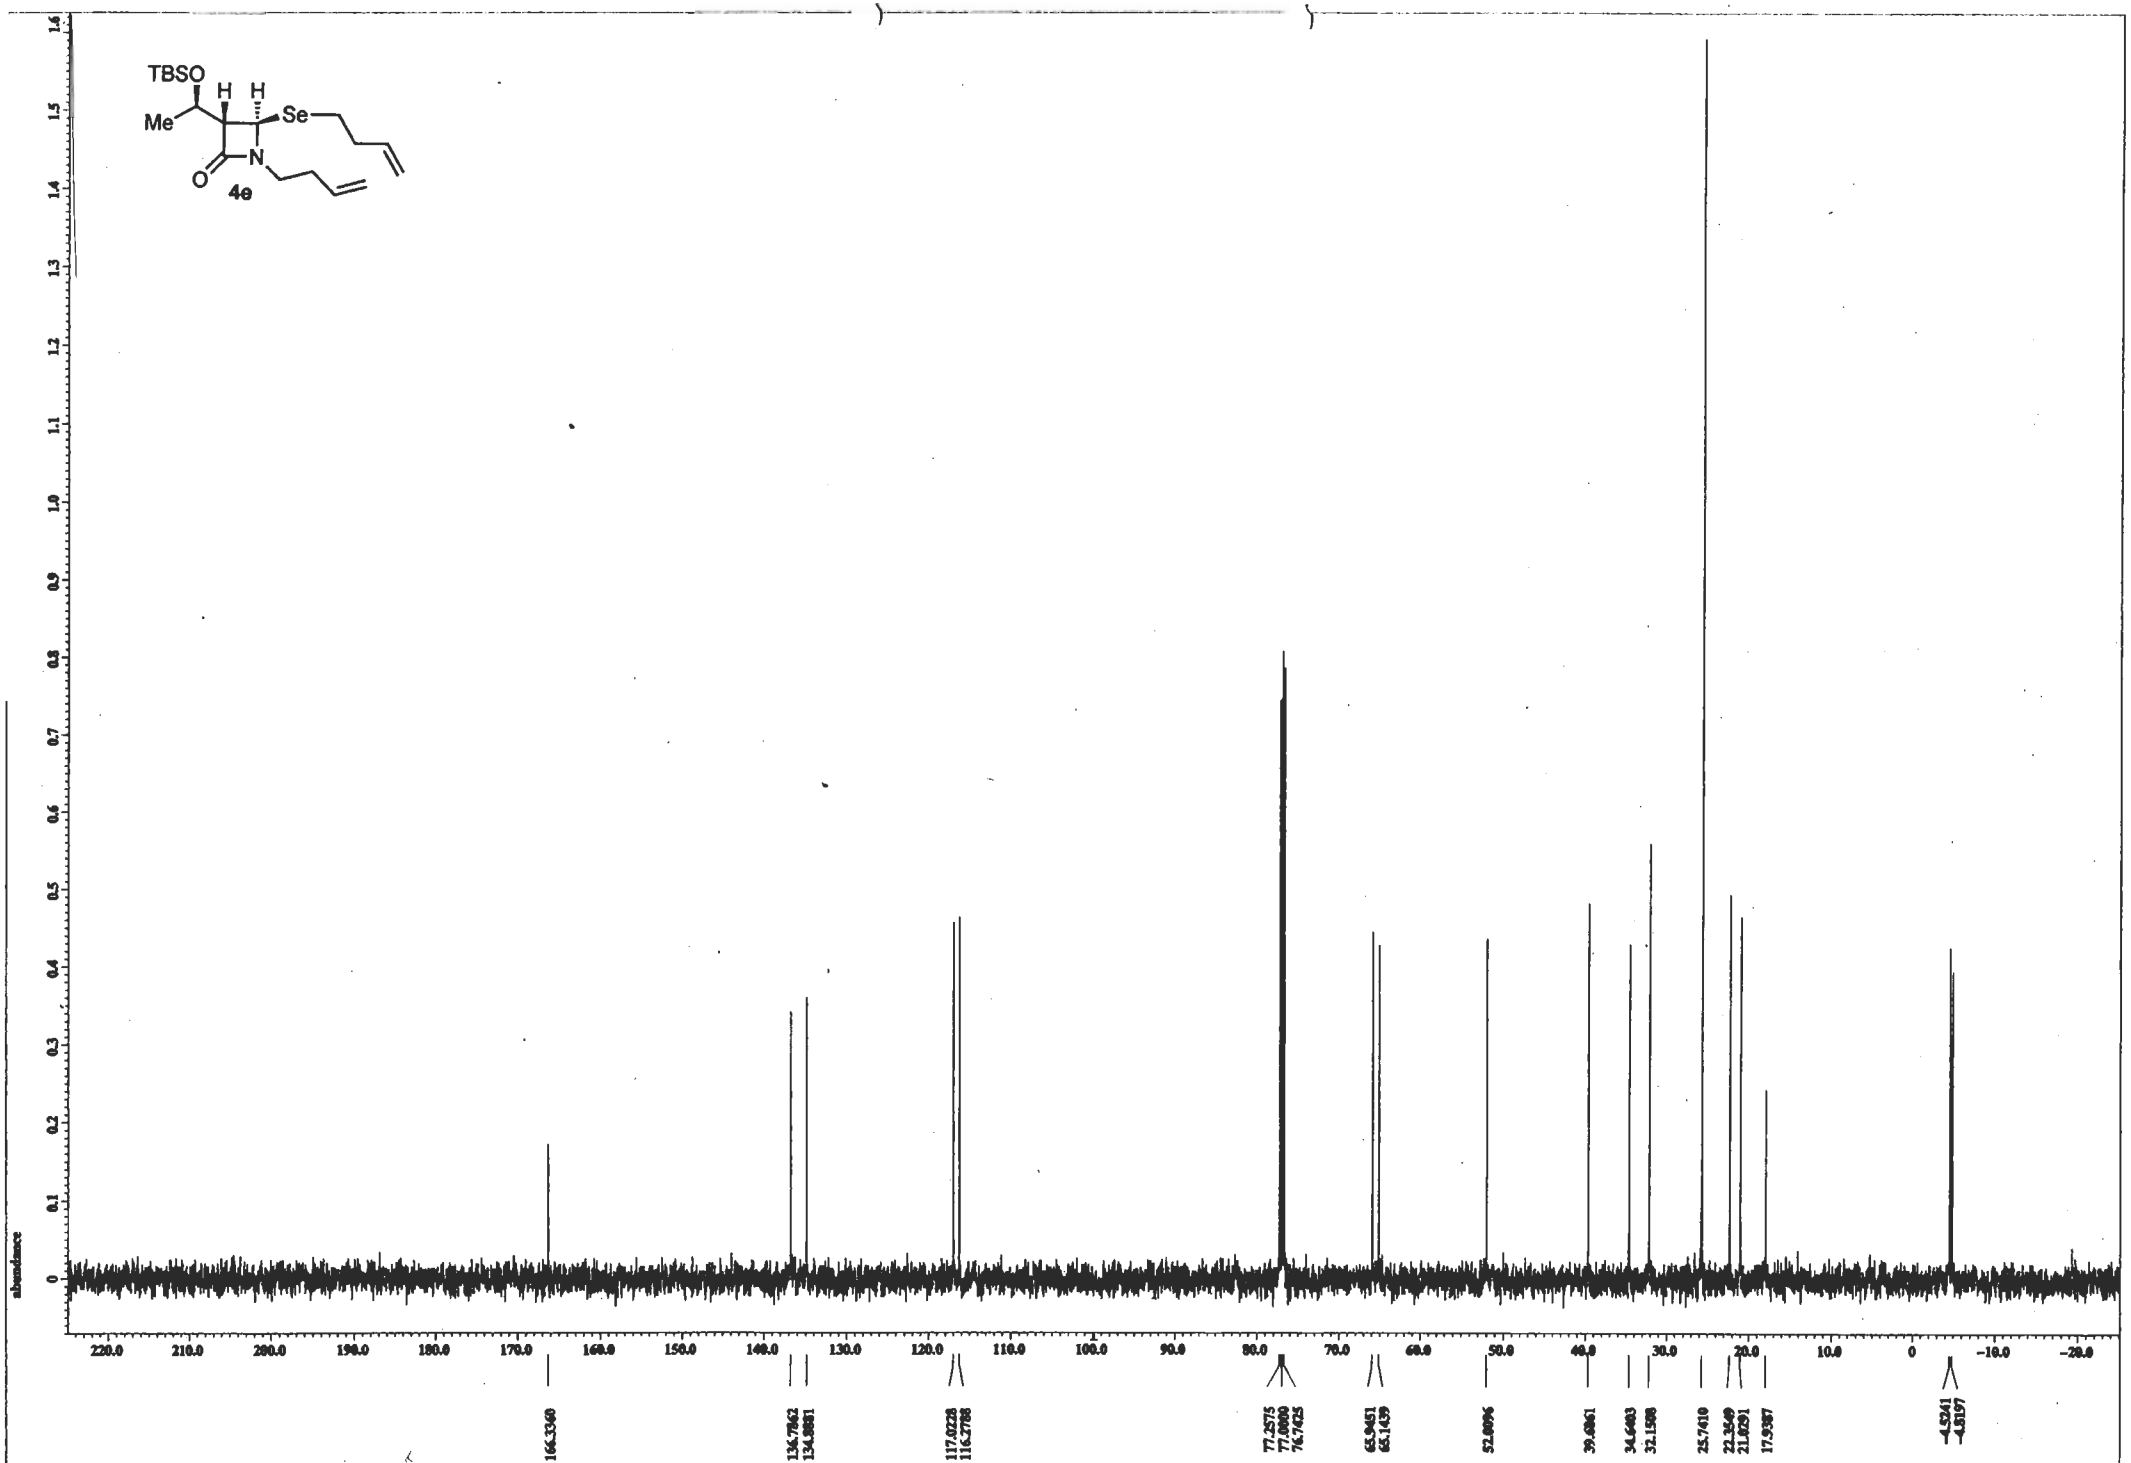

X : parts per Million : 13C

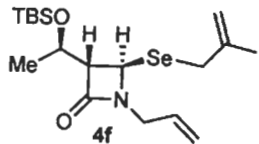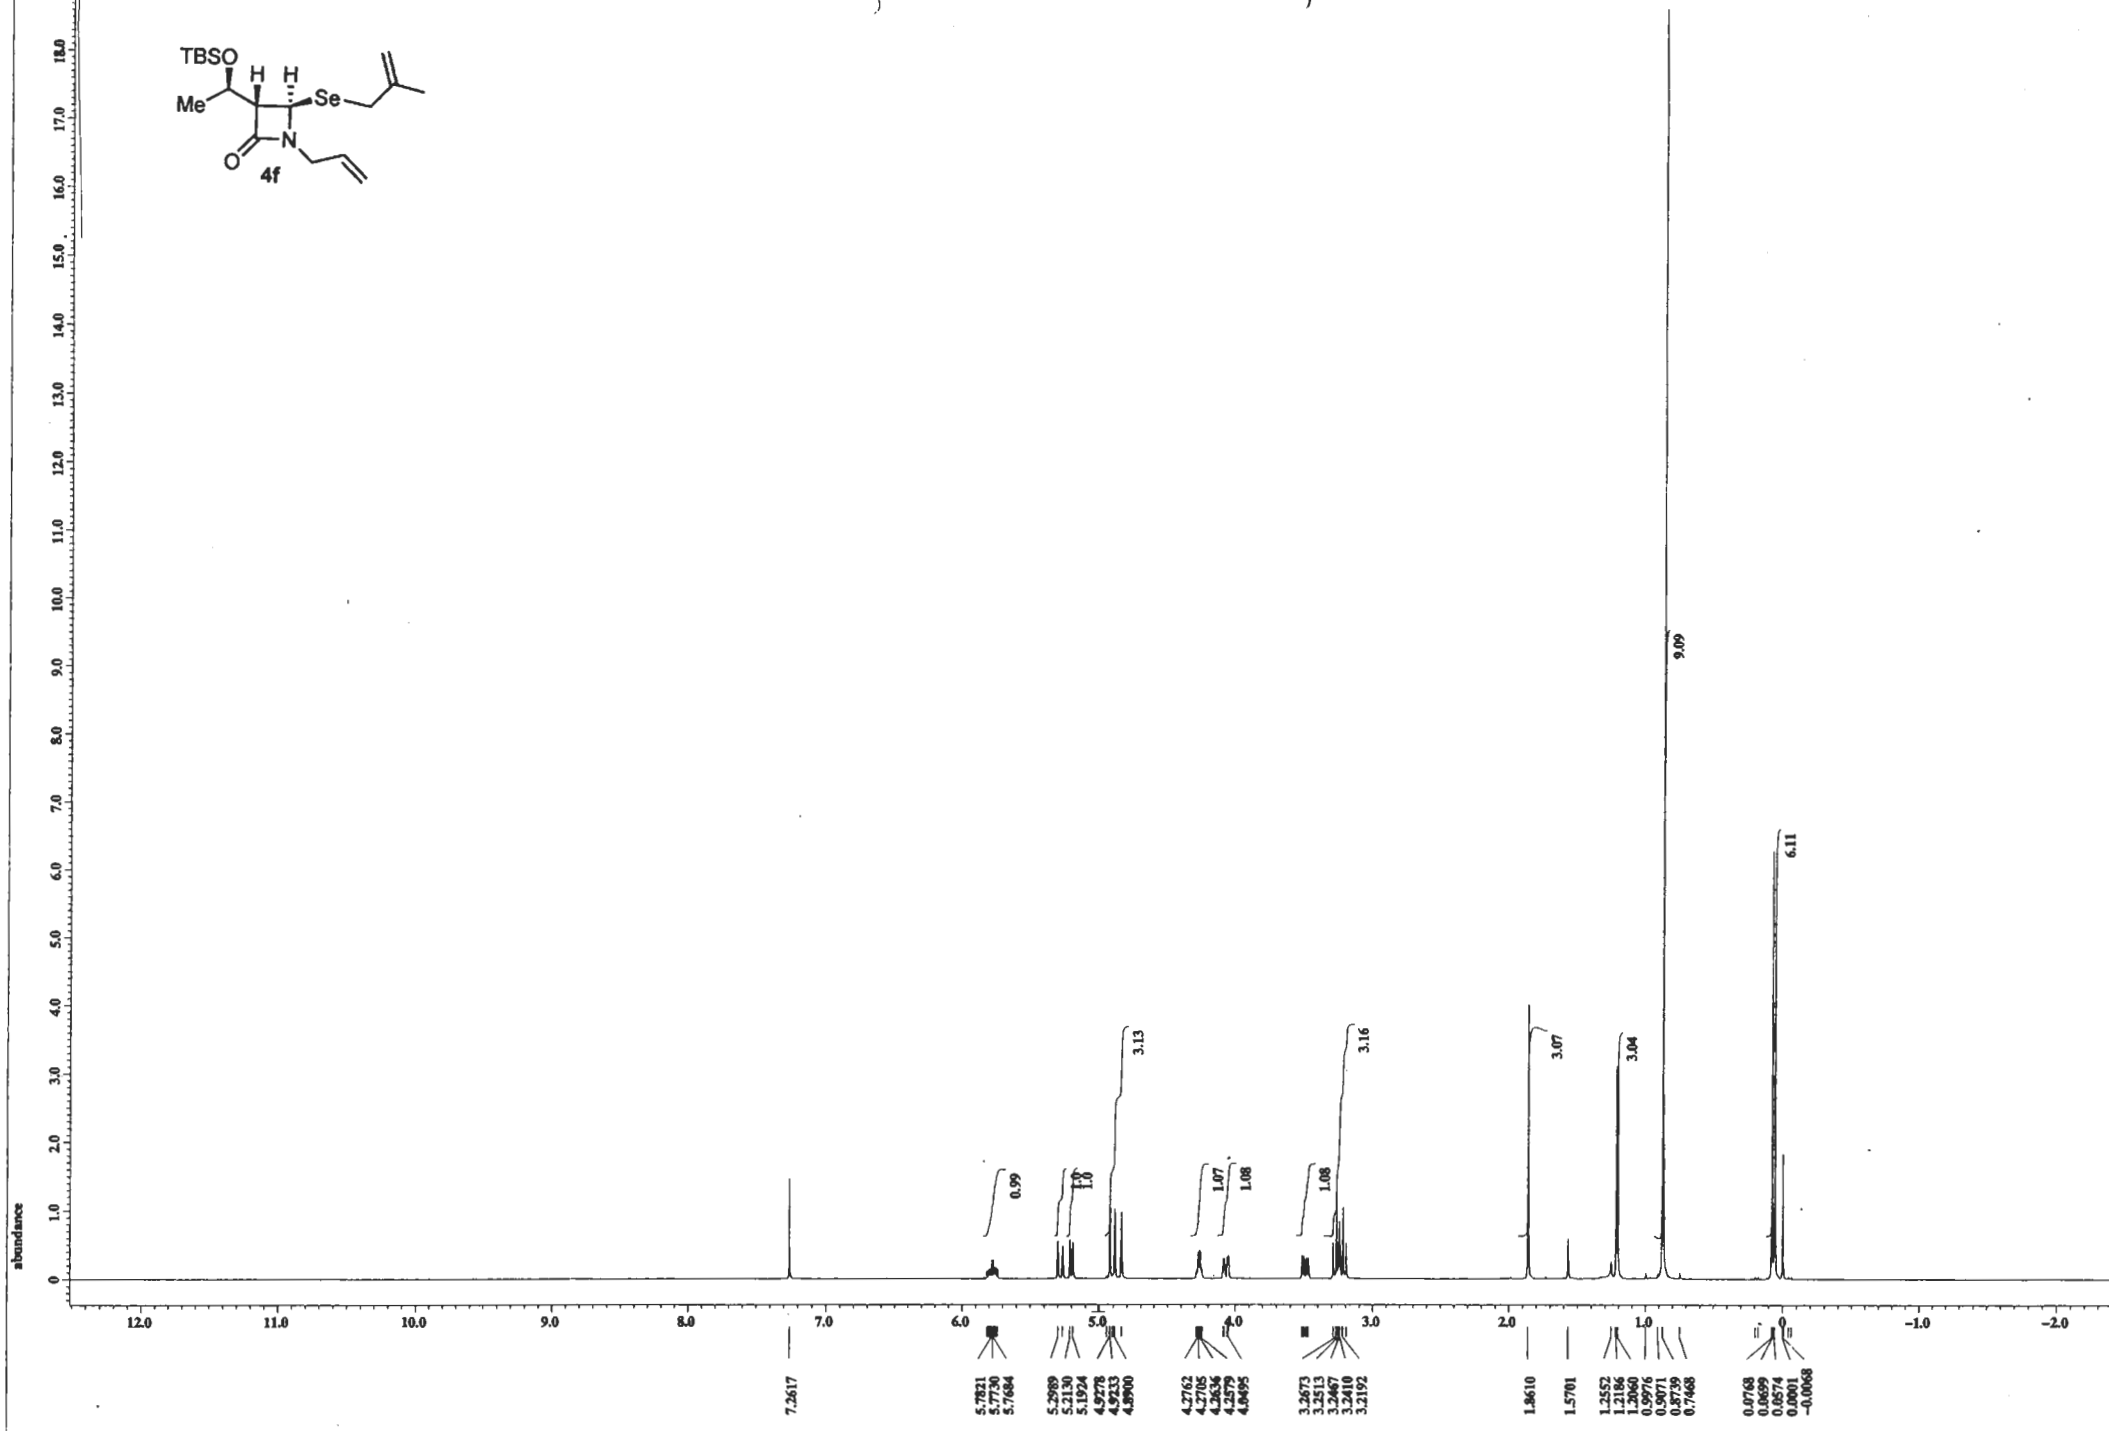

X : parts per Million : 1H

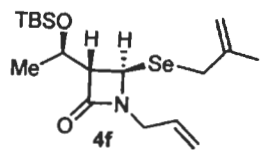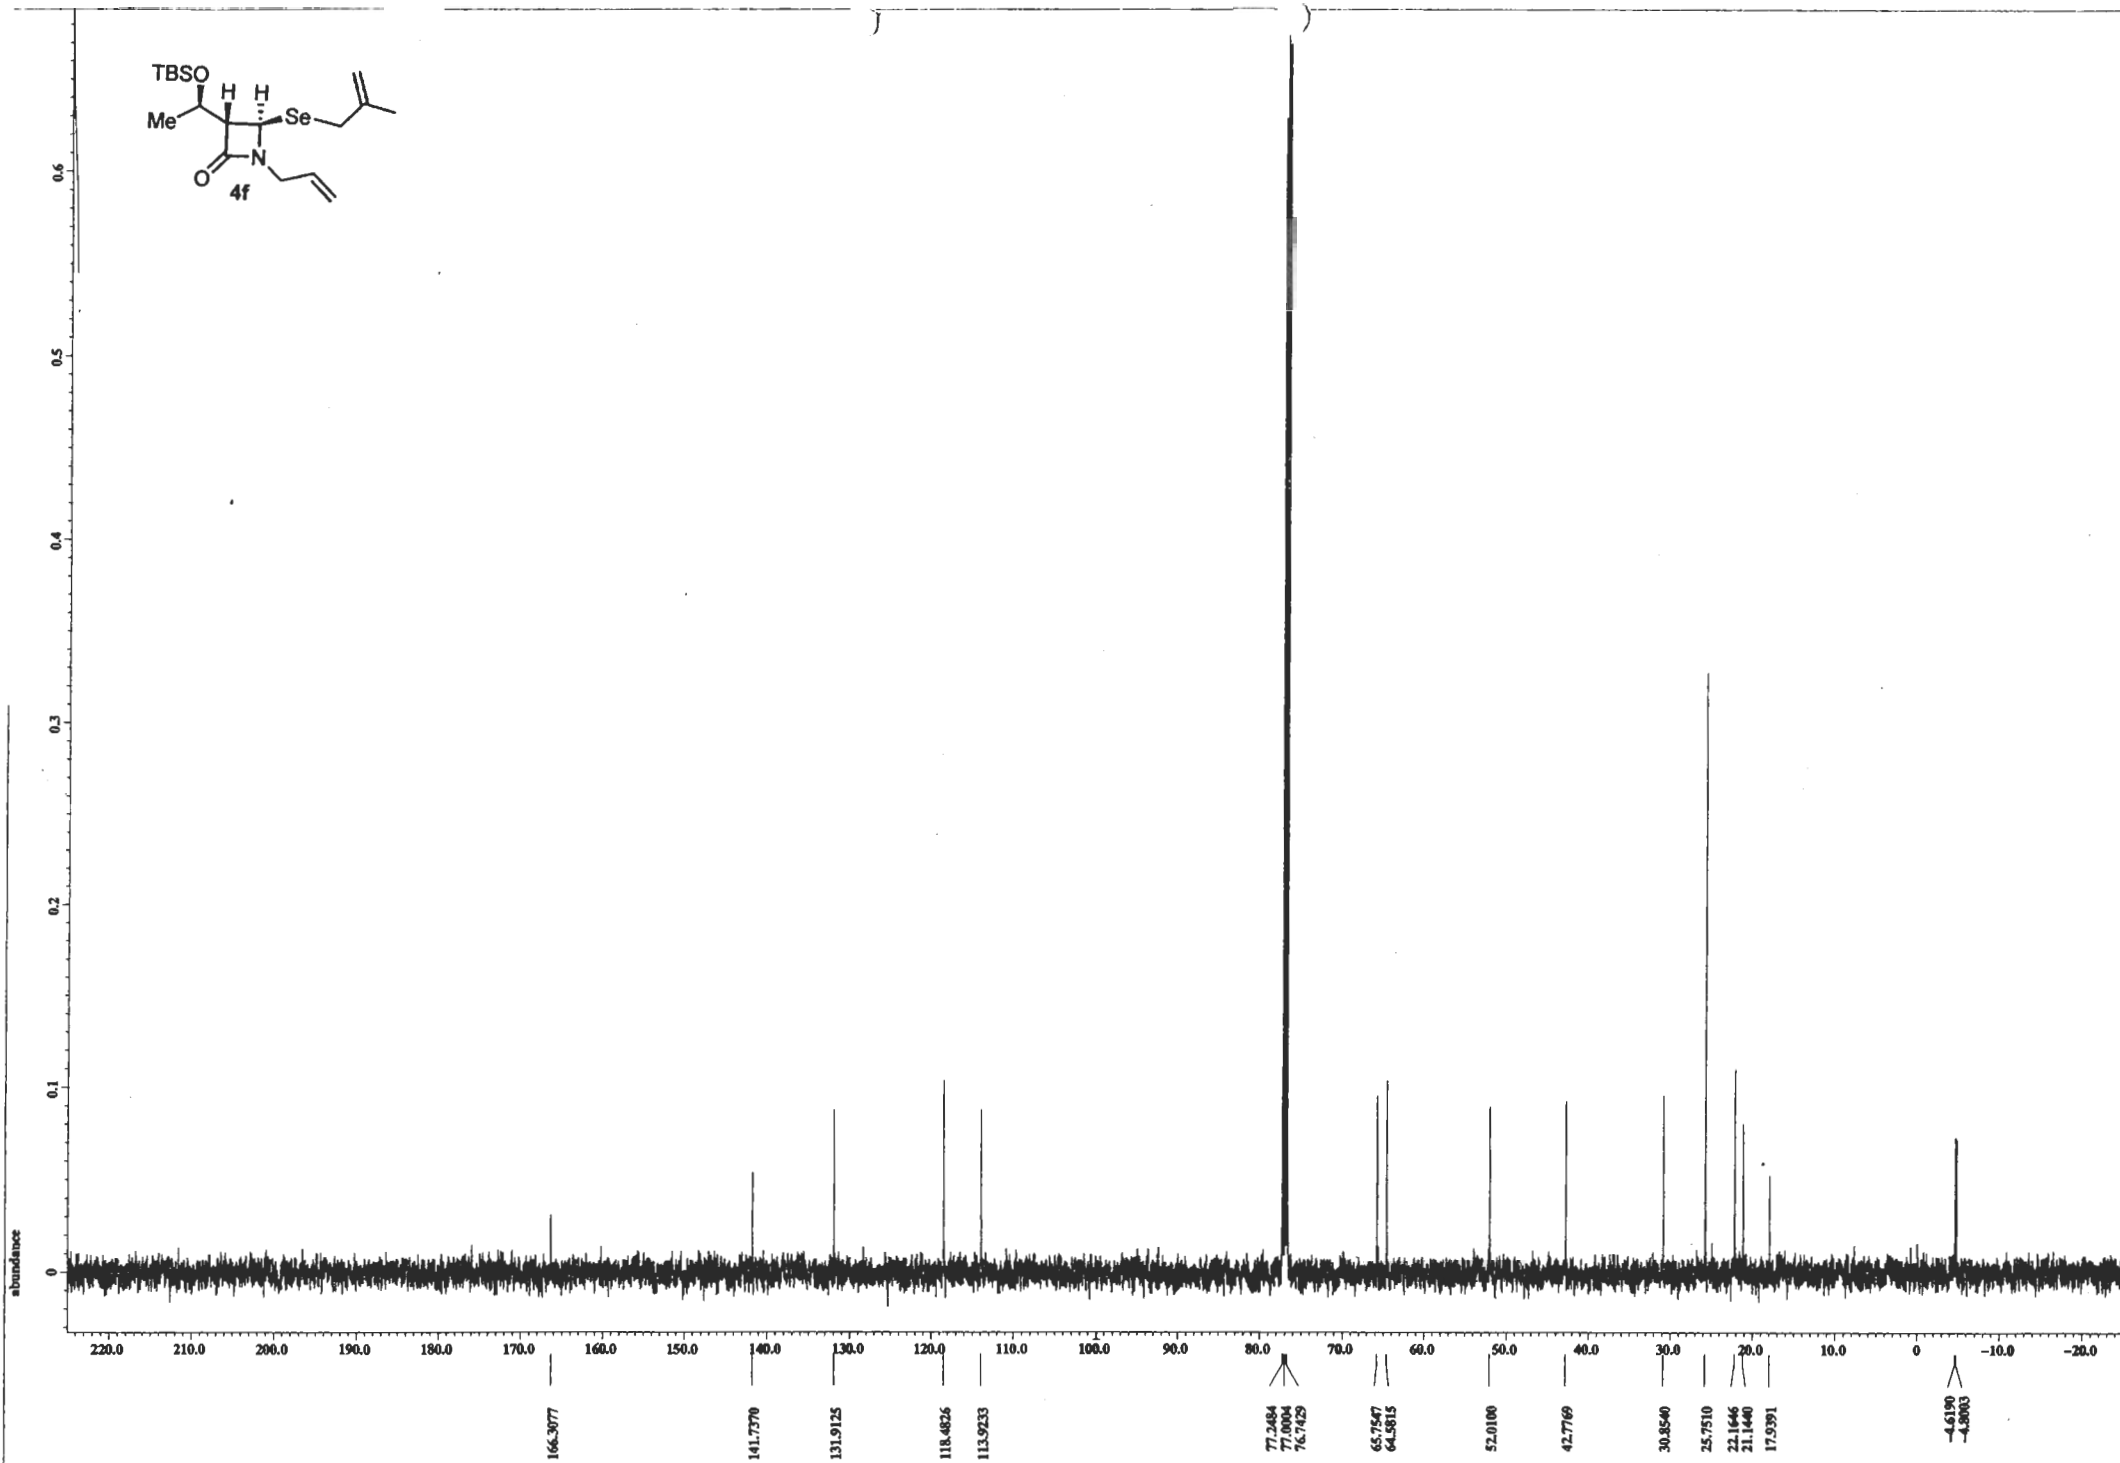

X : parts per Million : 13C

166.3077

141.7370

131.9125

118.4826

113.9233

77.2484  
77.0004  
76.7429

65.7547  
64.5815

52.0100

42.7769

30.8540

25.7510

22.1646

21.1440

17.9391

-4.6190  
-4.8803



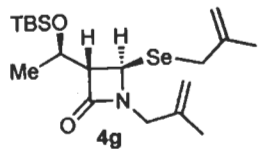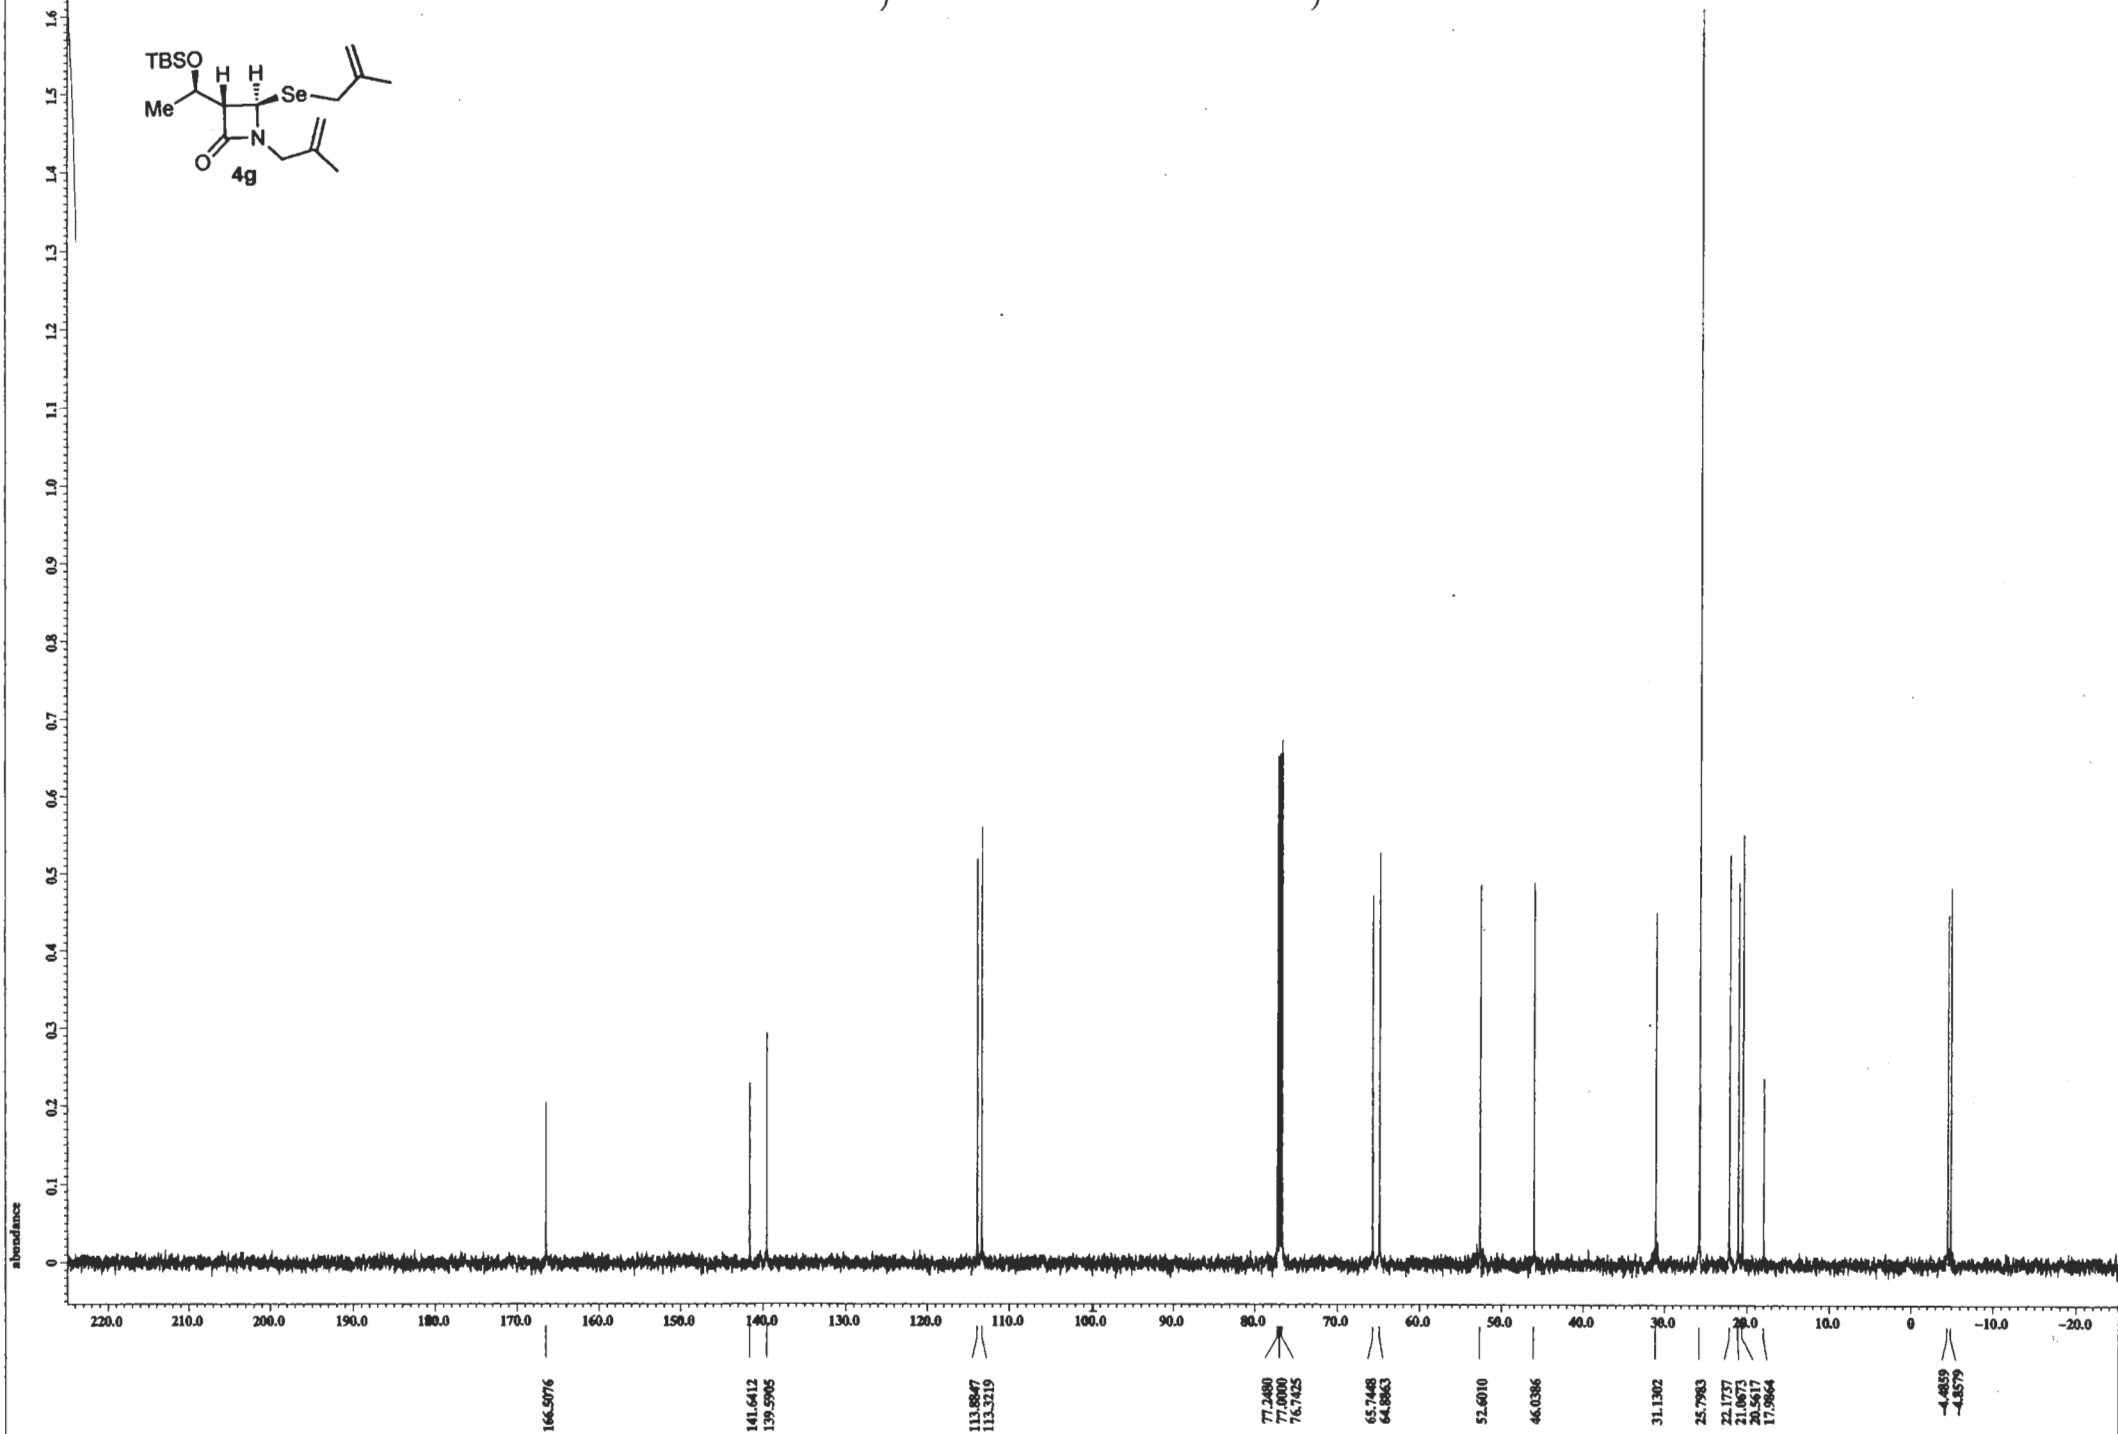

X : parts per Million : 13C

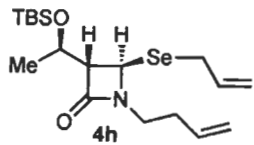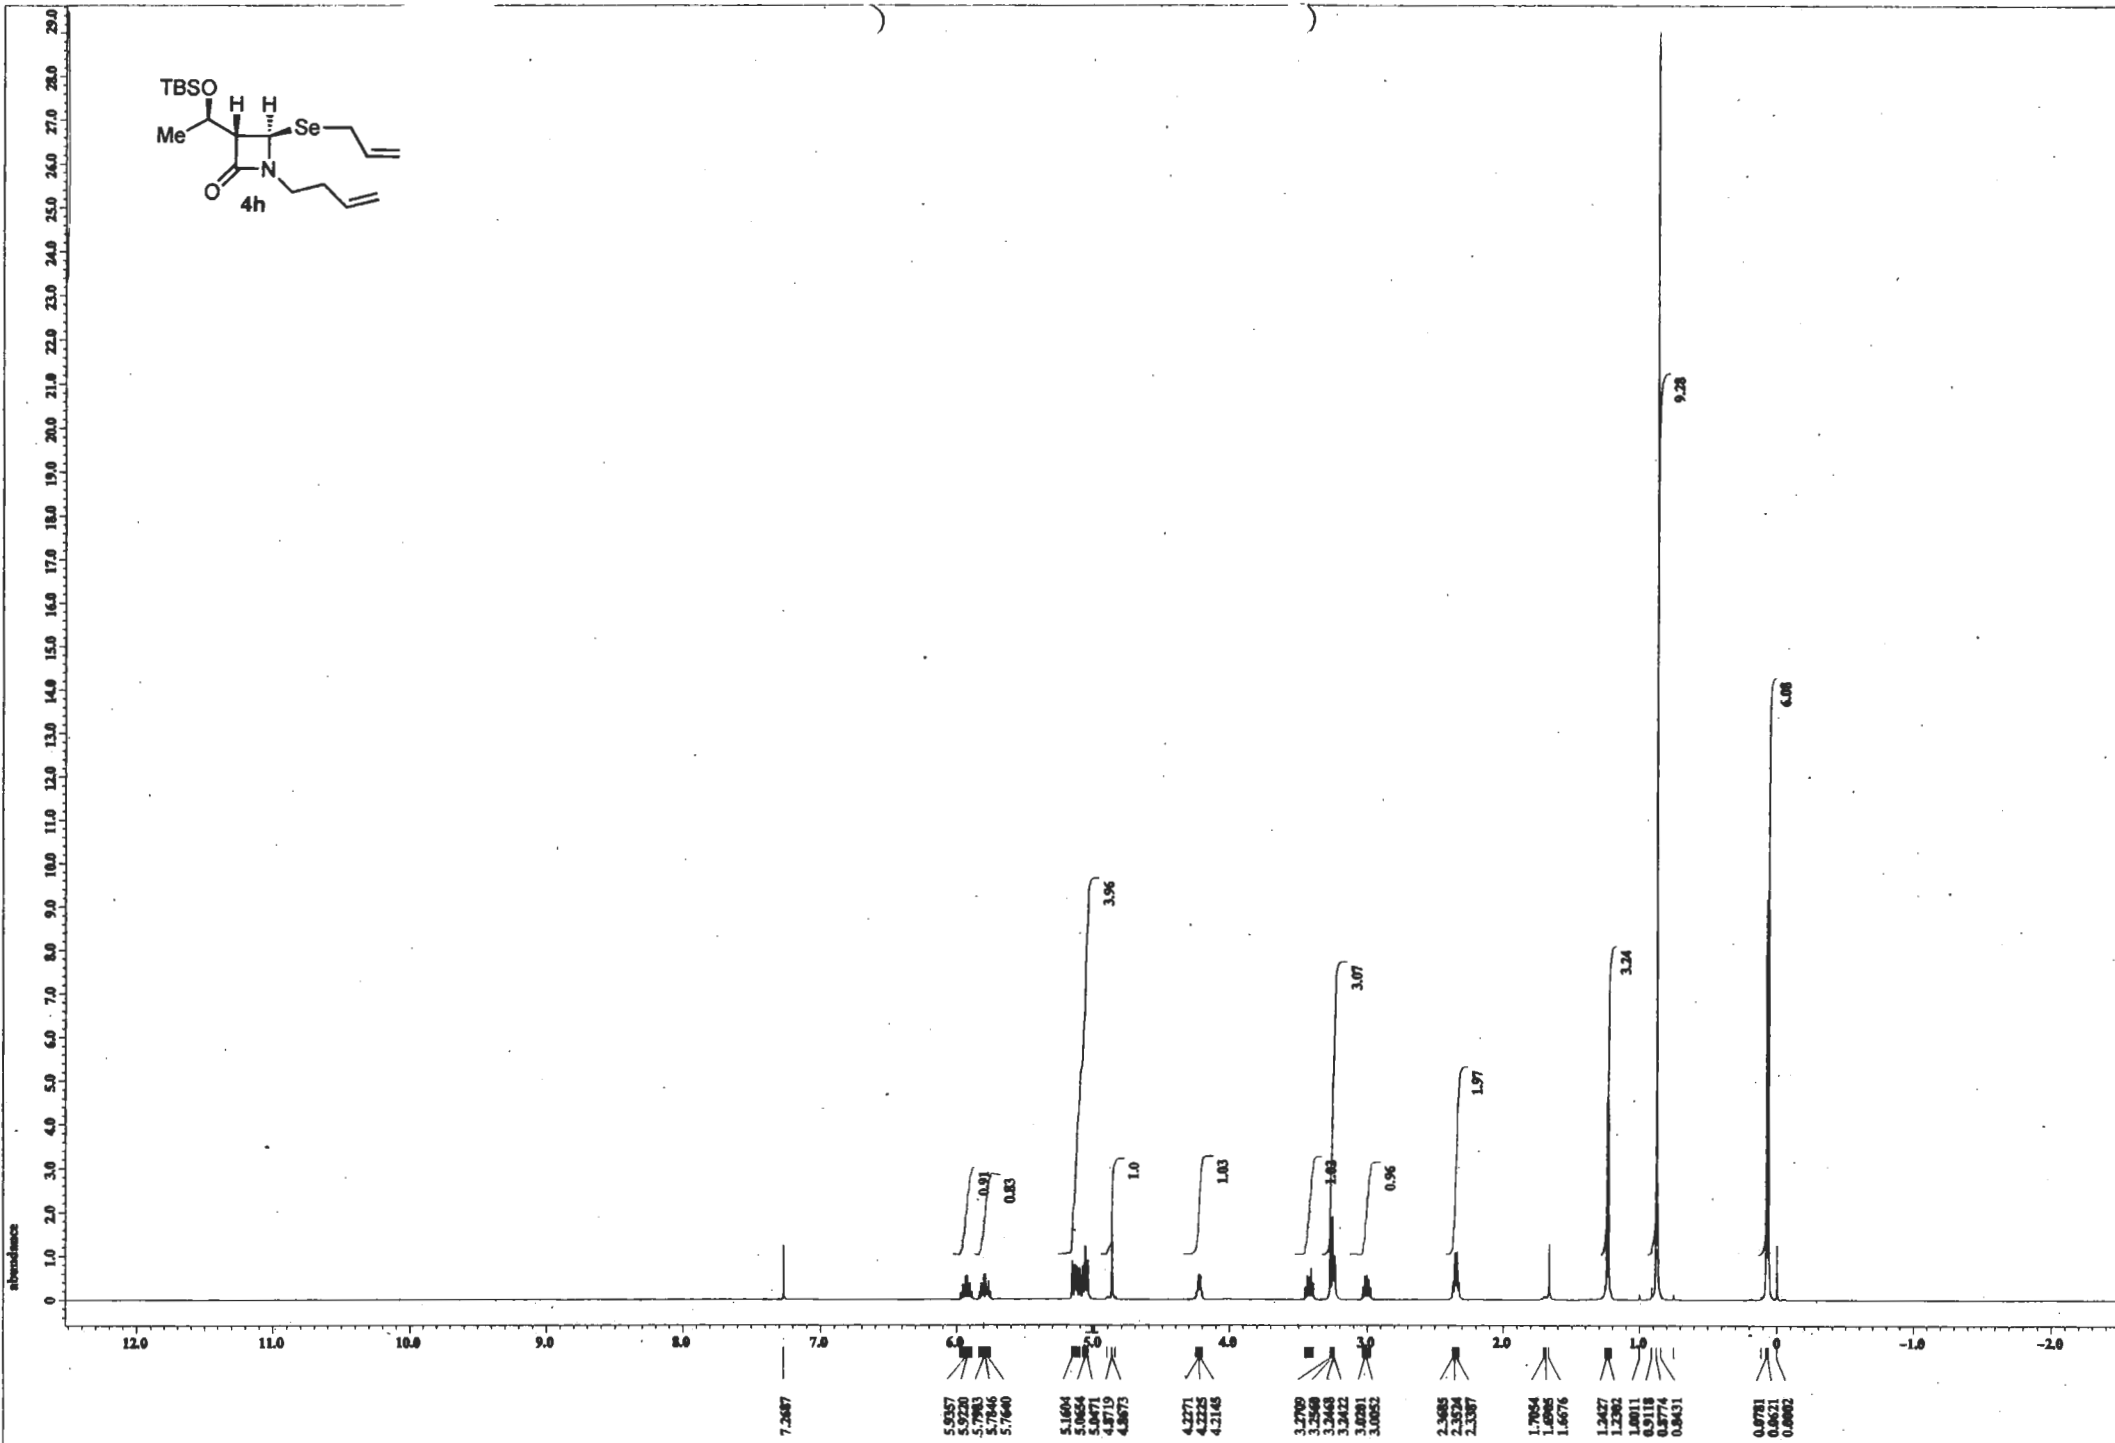

X : parts per Million : 1H

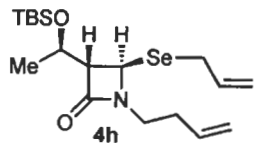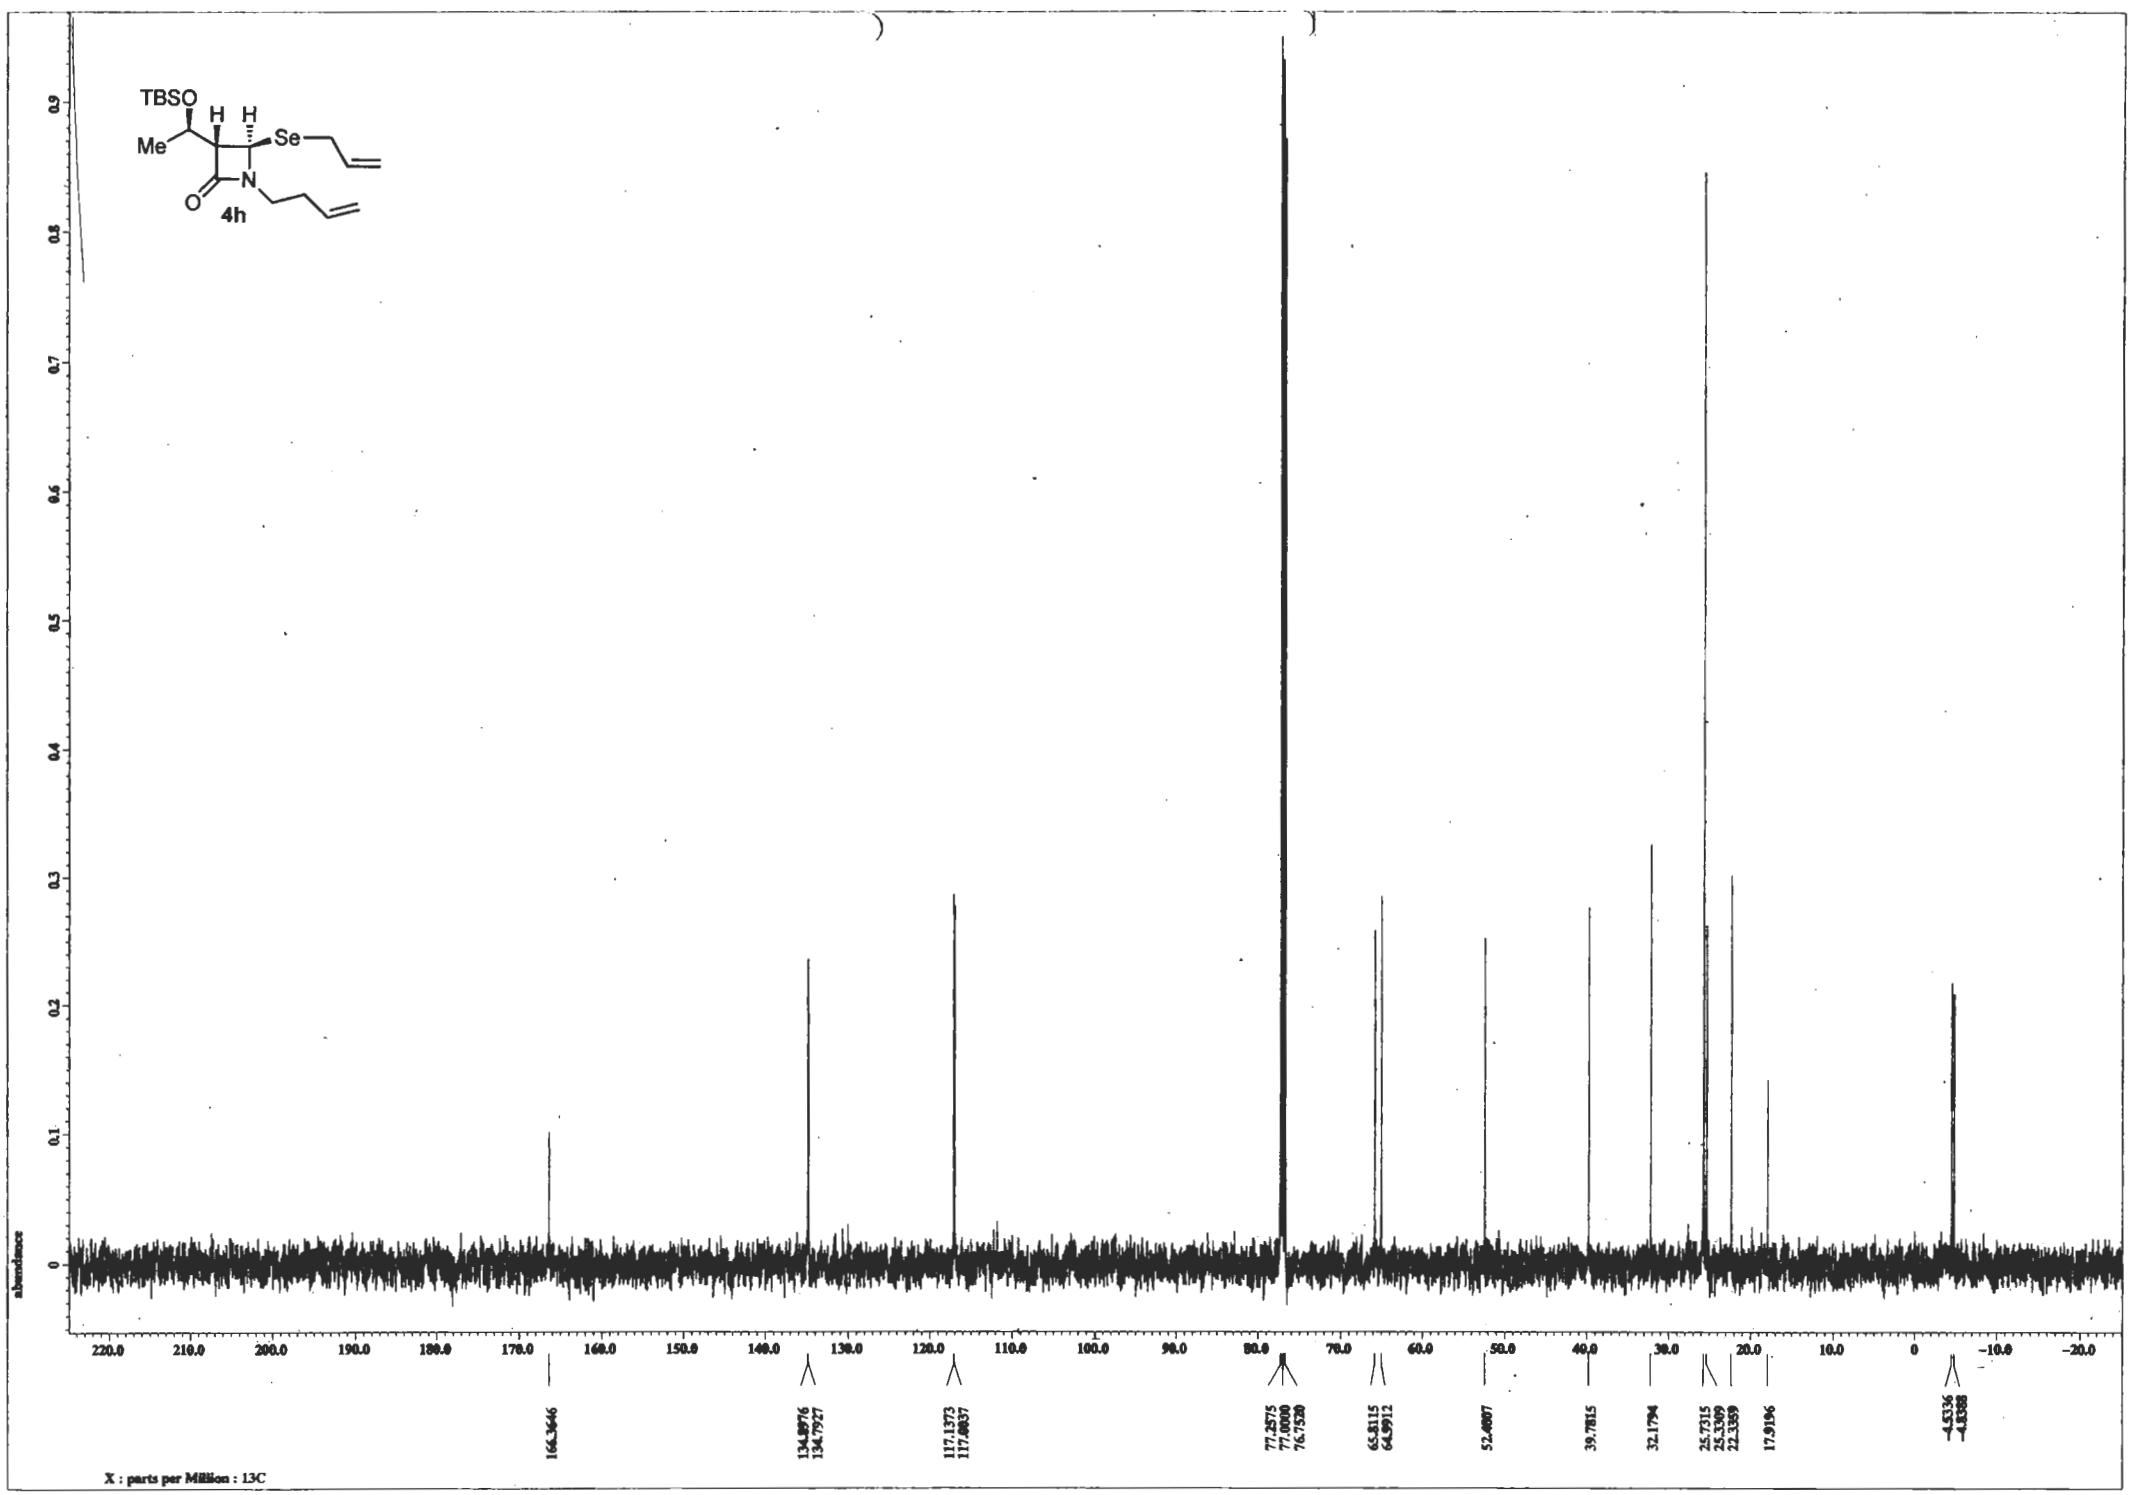

X : parts per Million : 13C

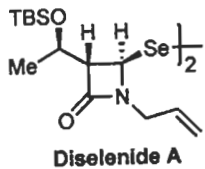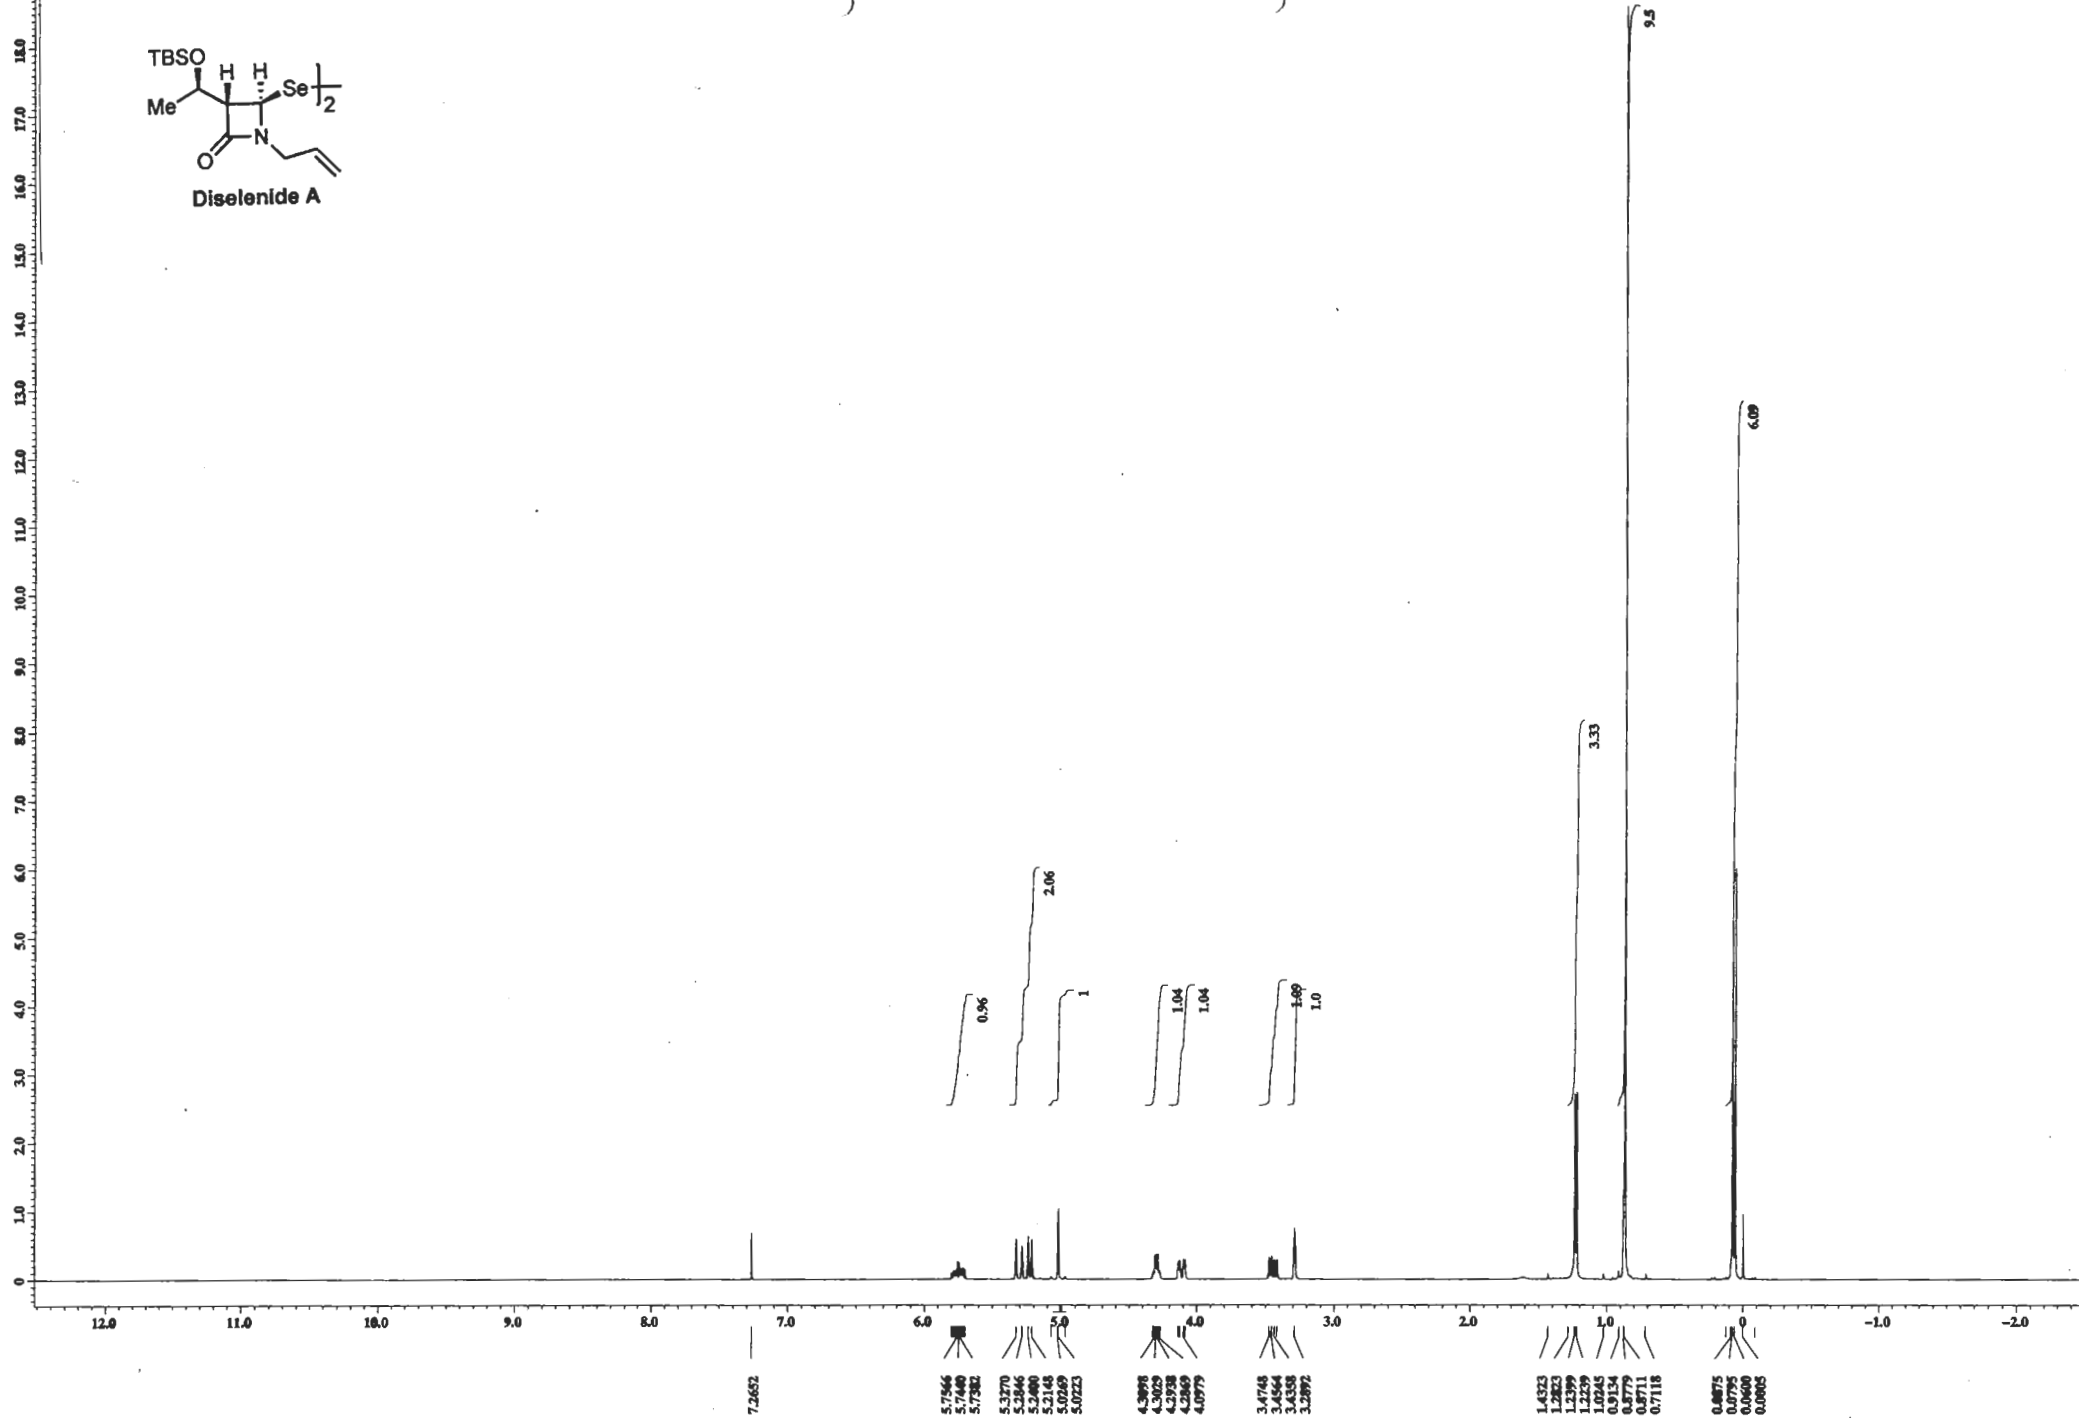



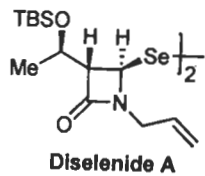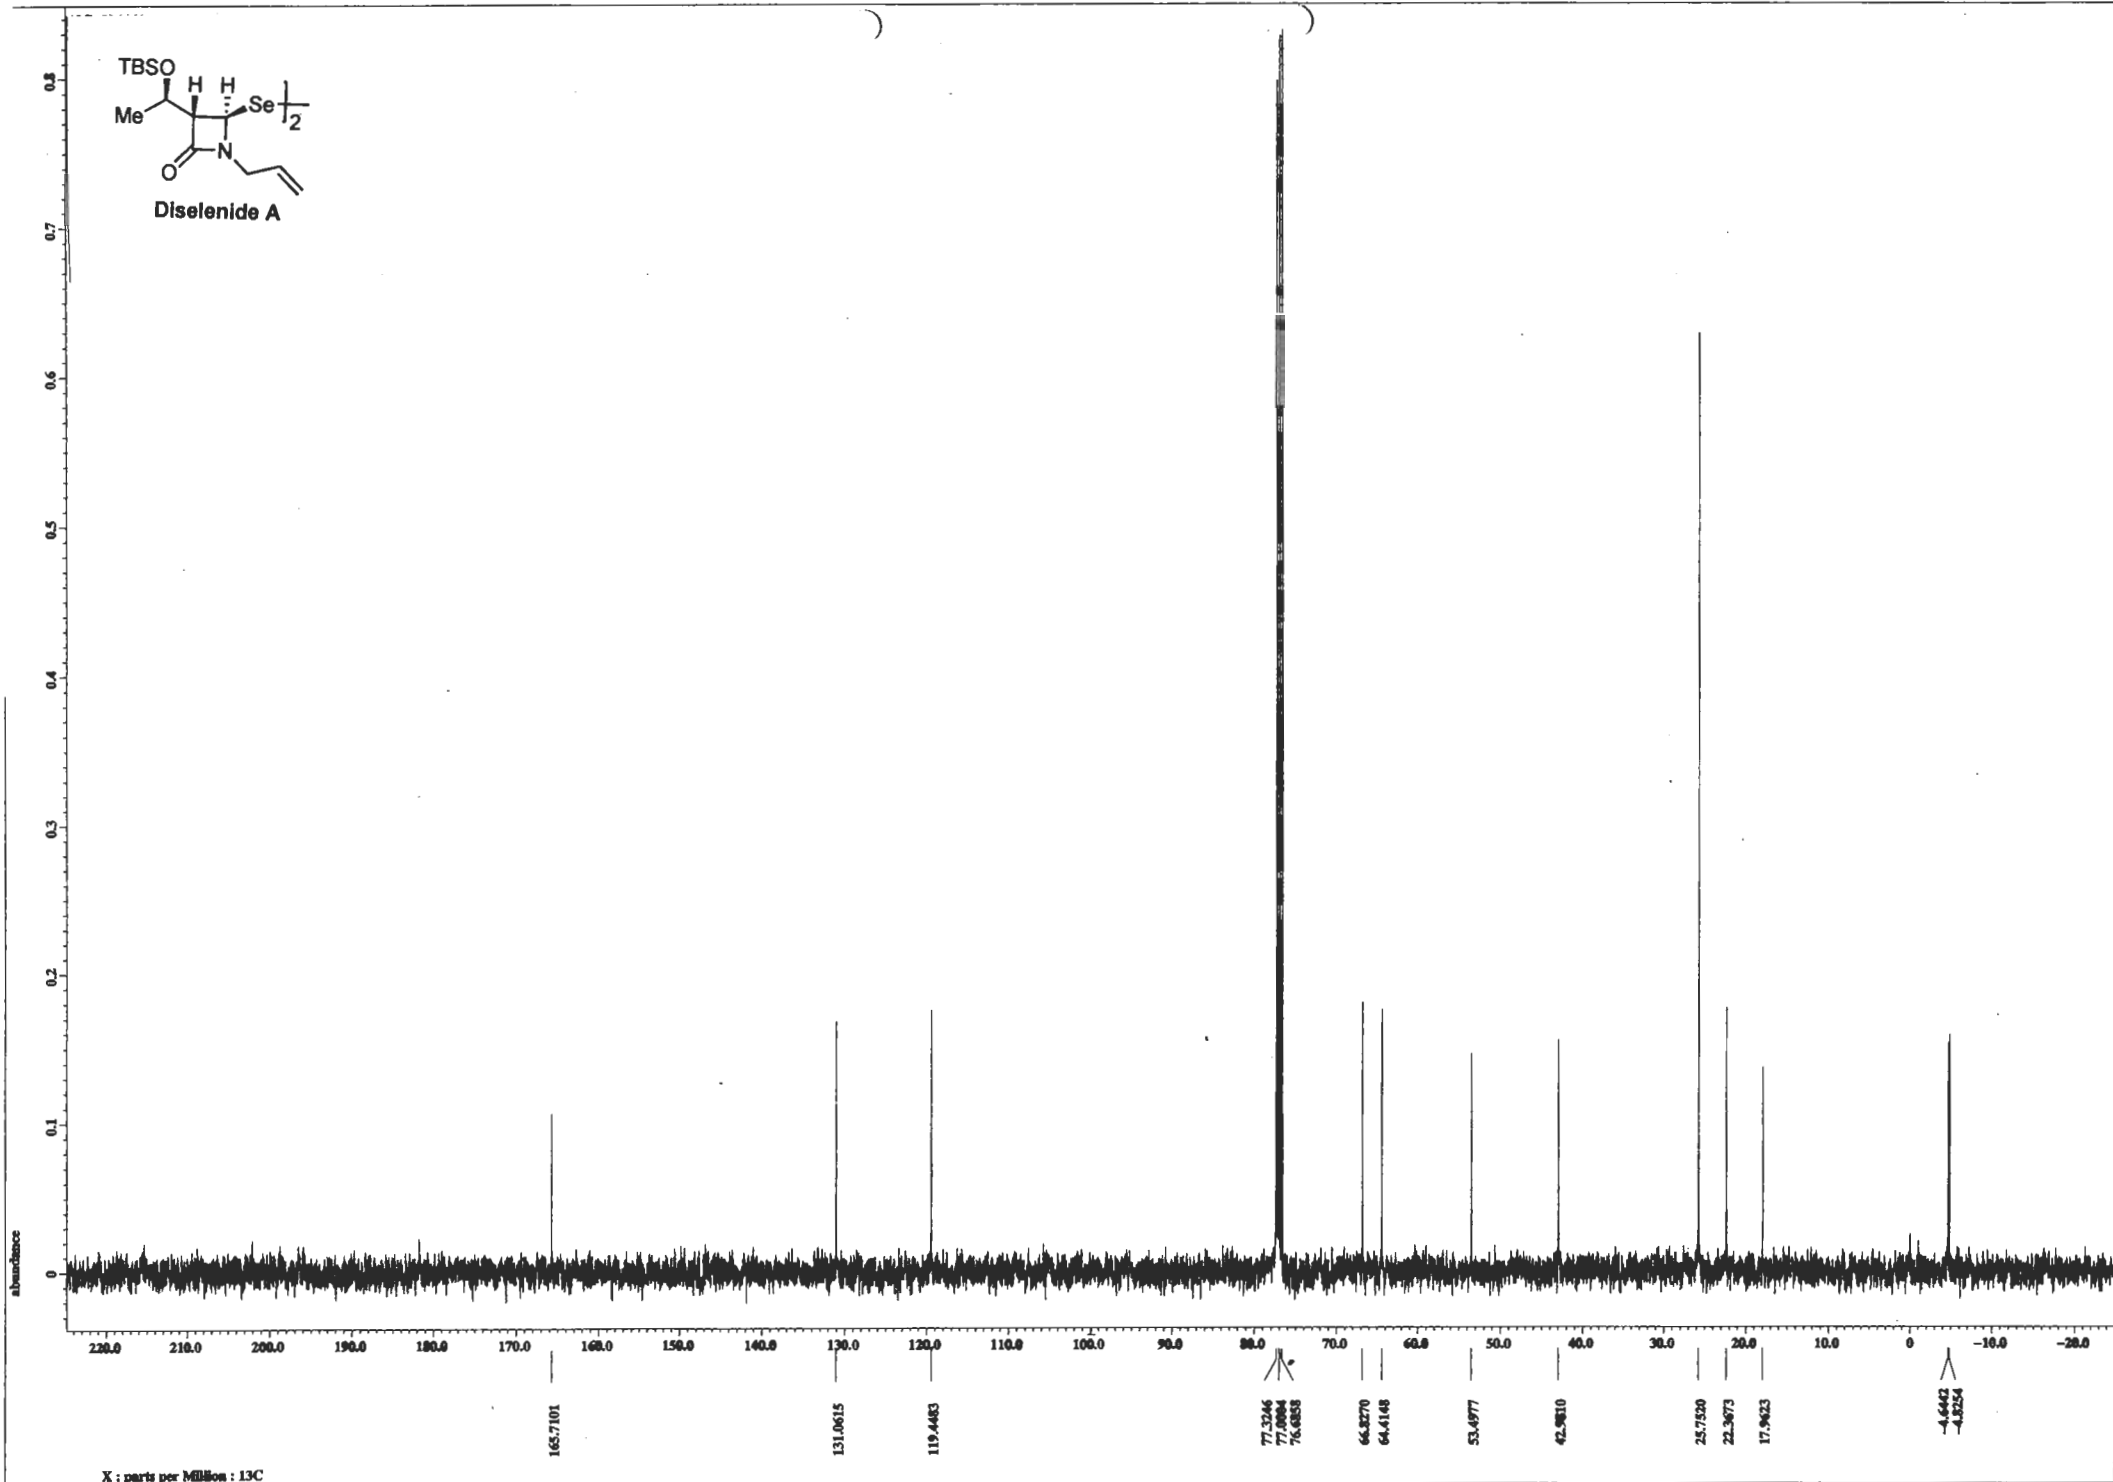

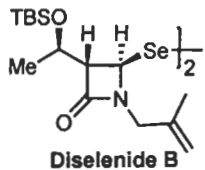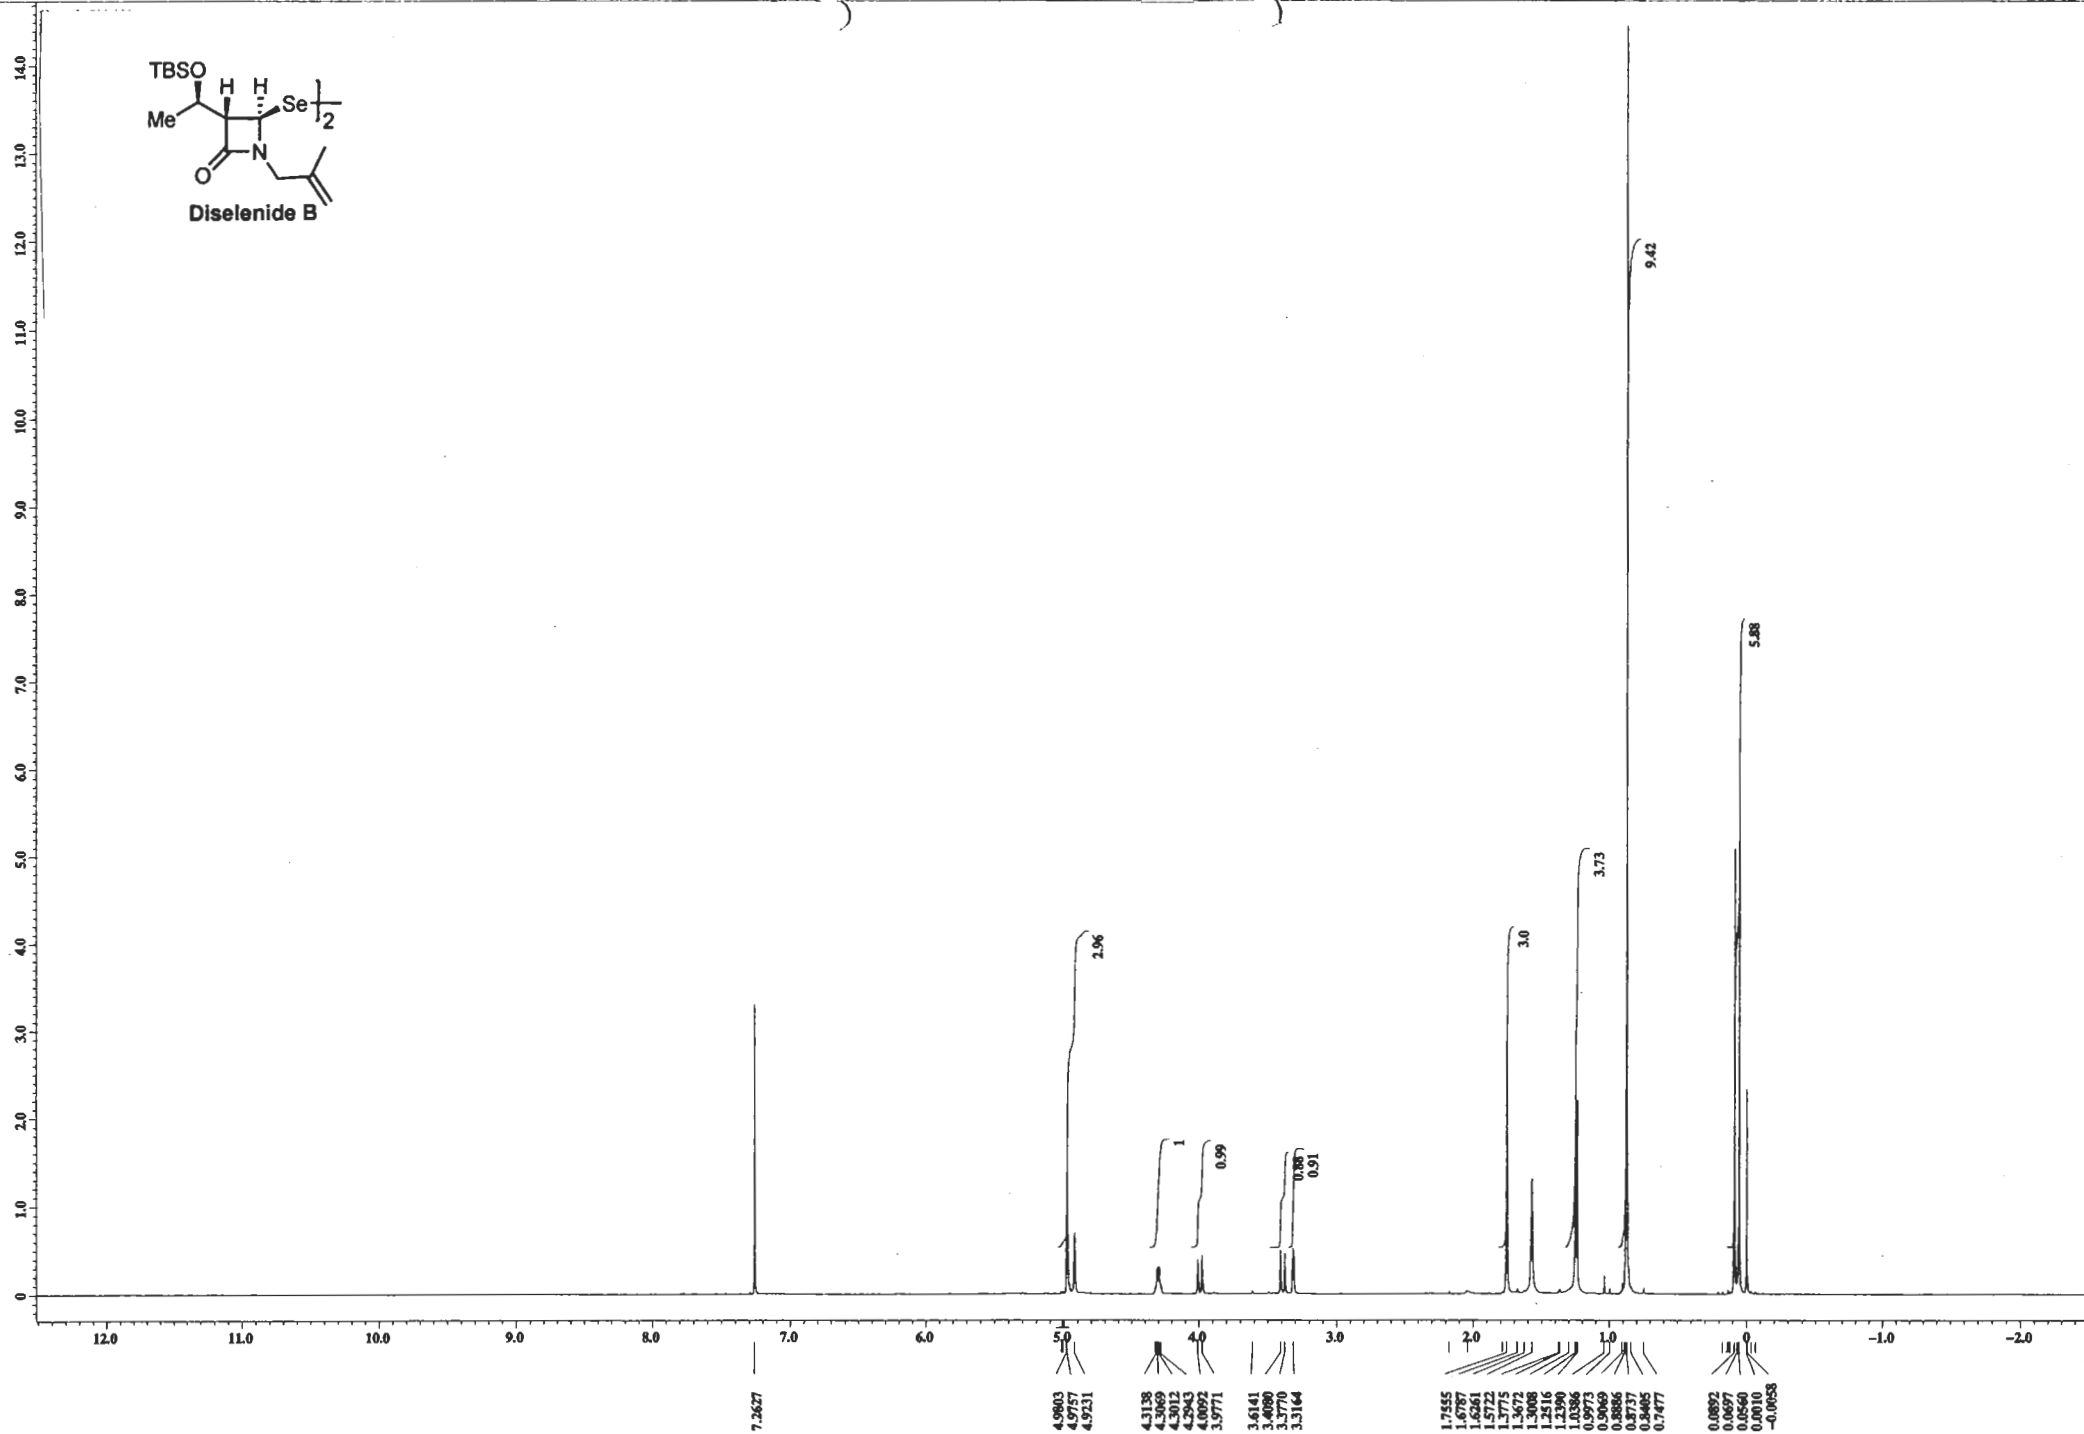

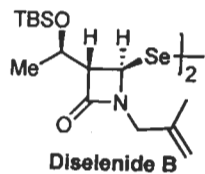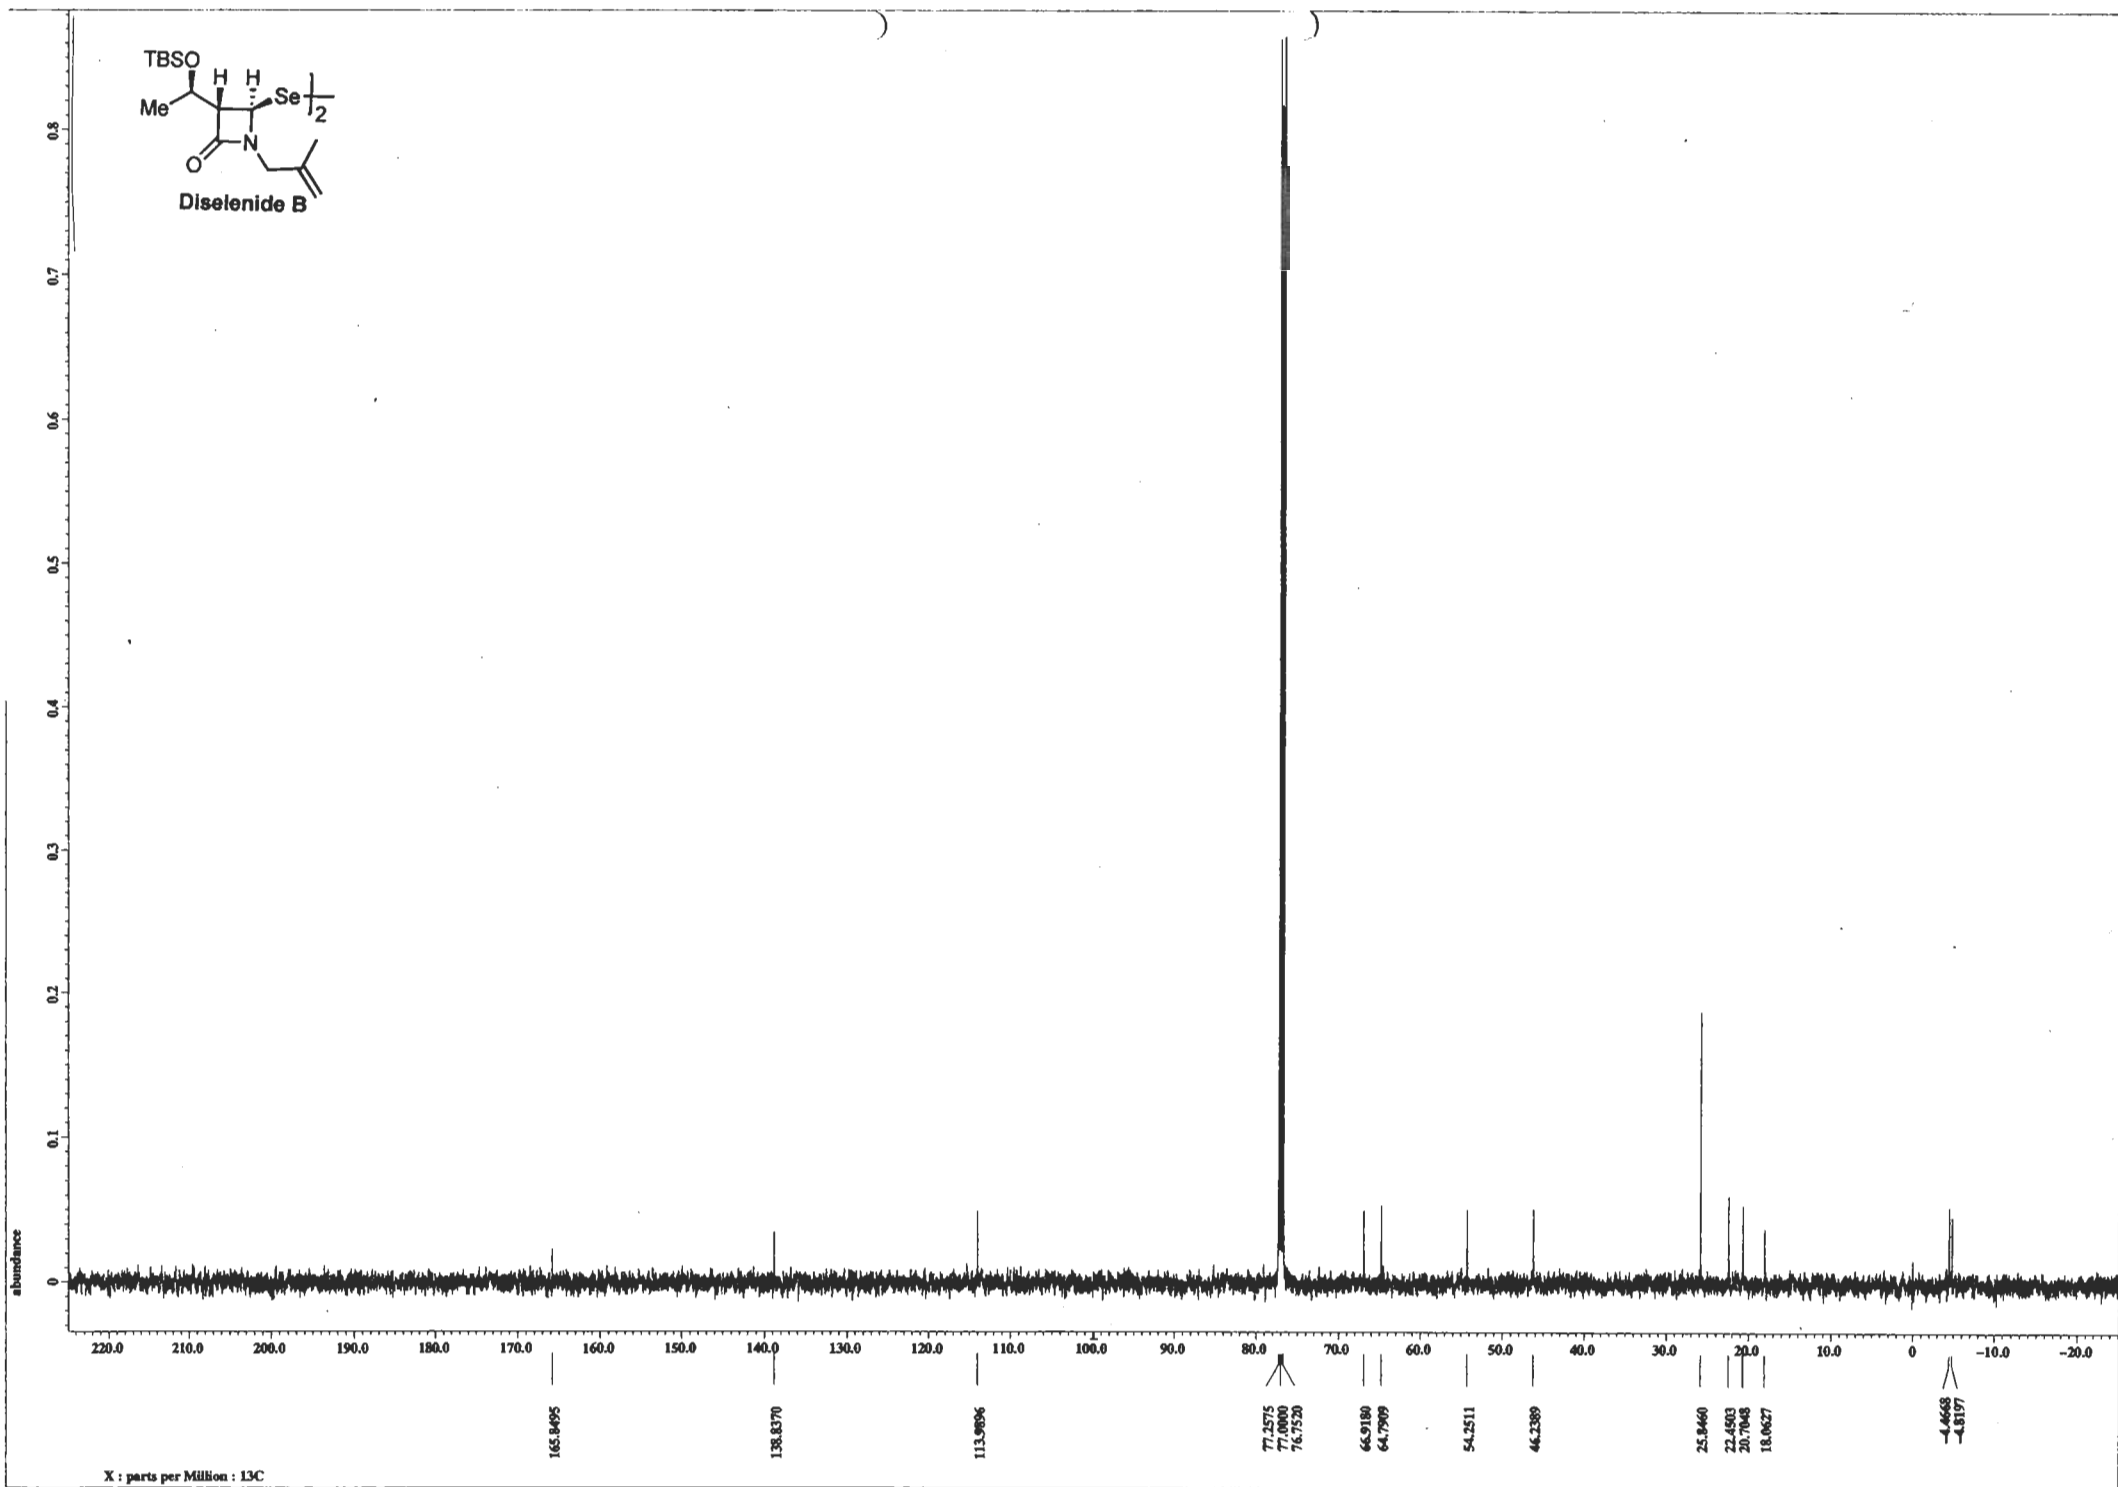

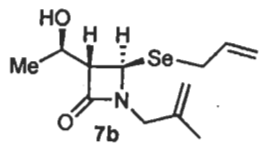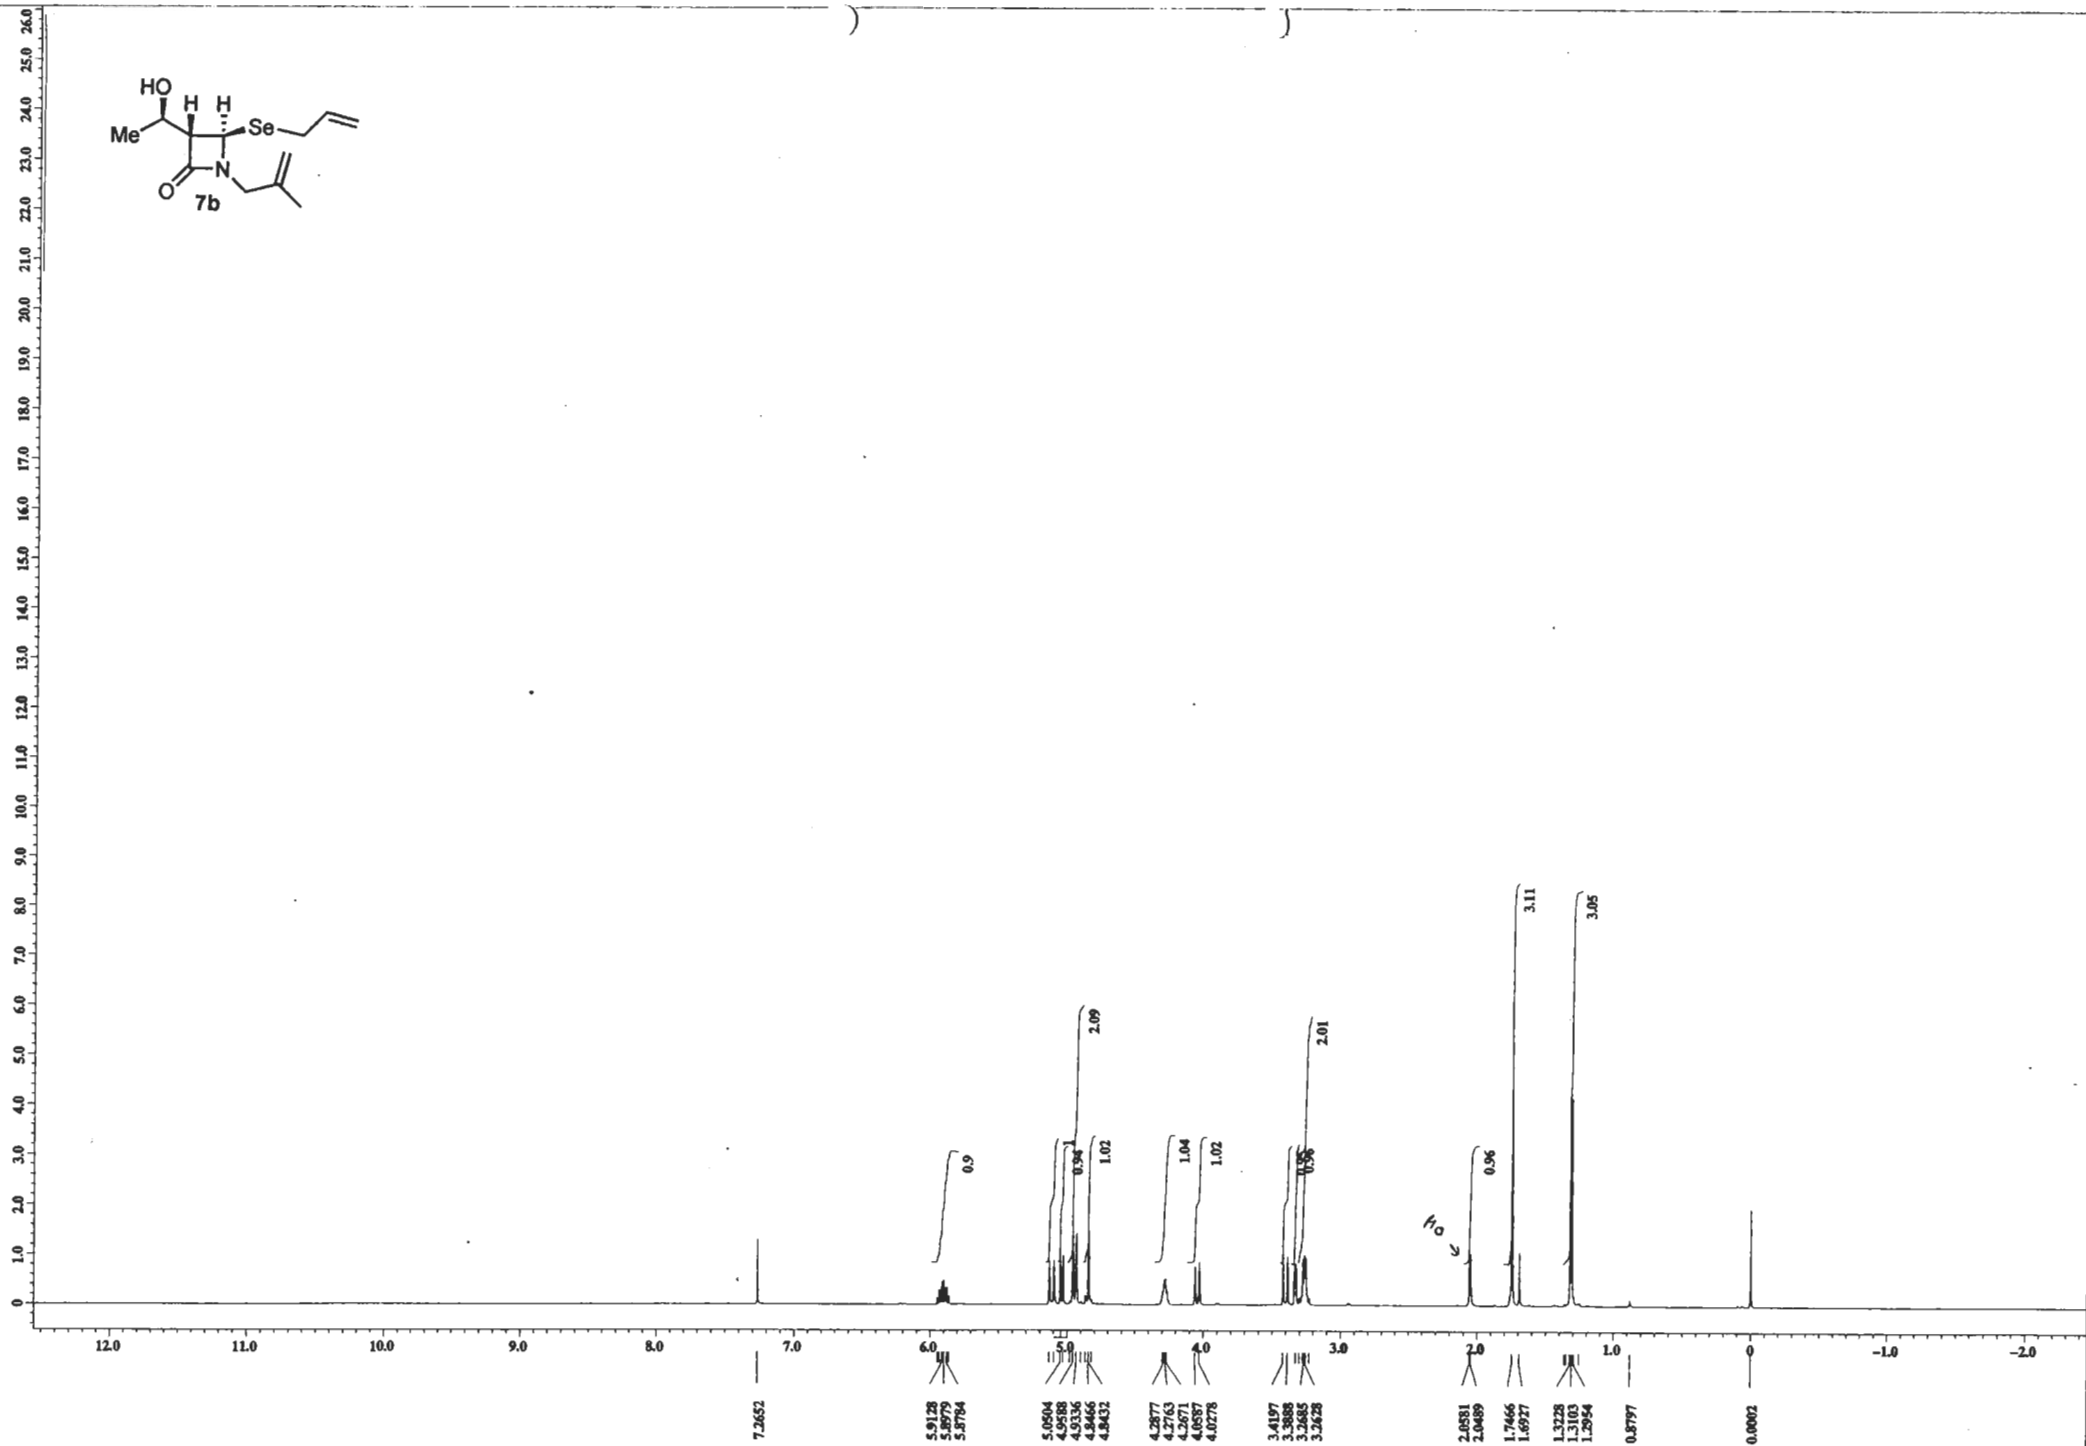

X : parts per Million : 1H

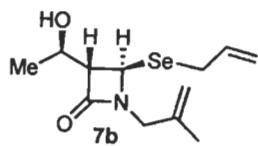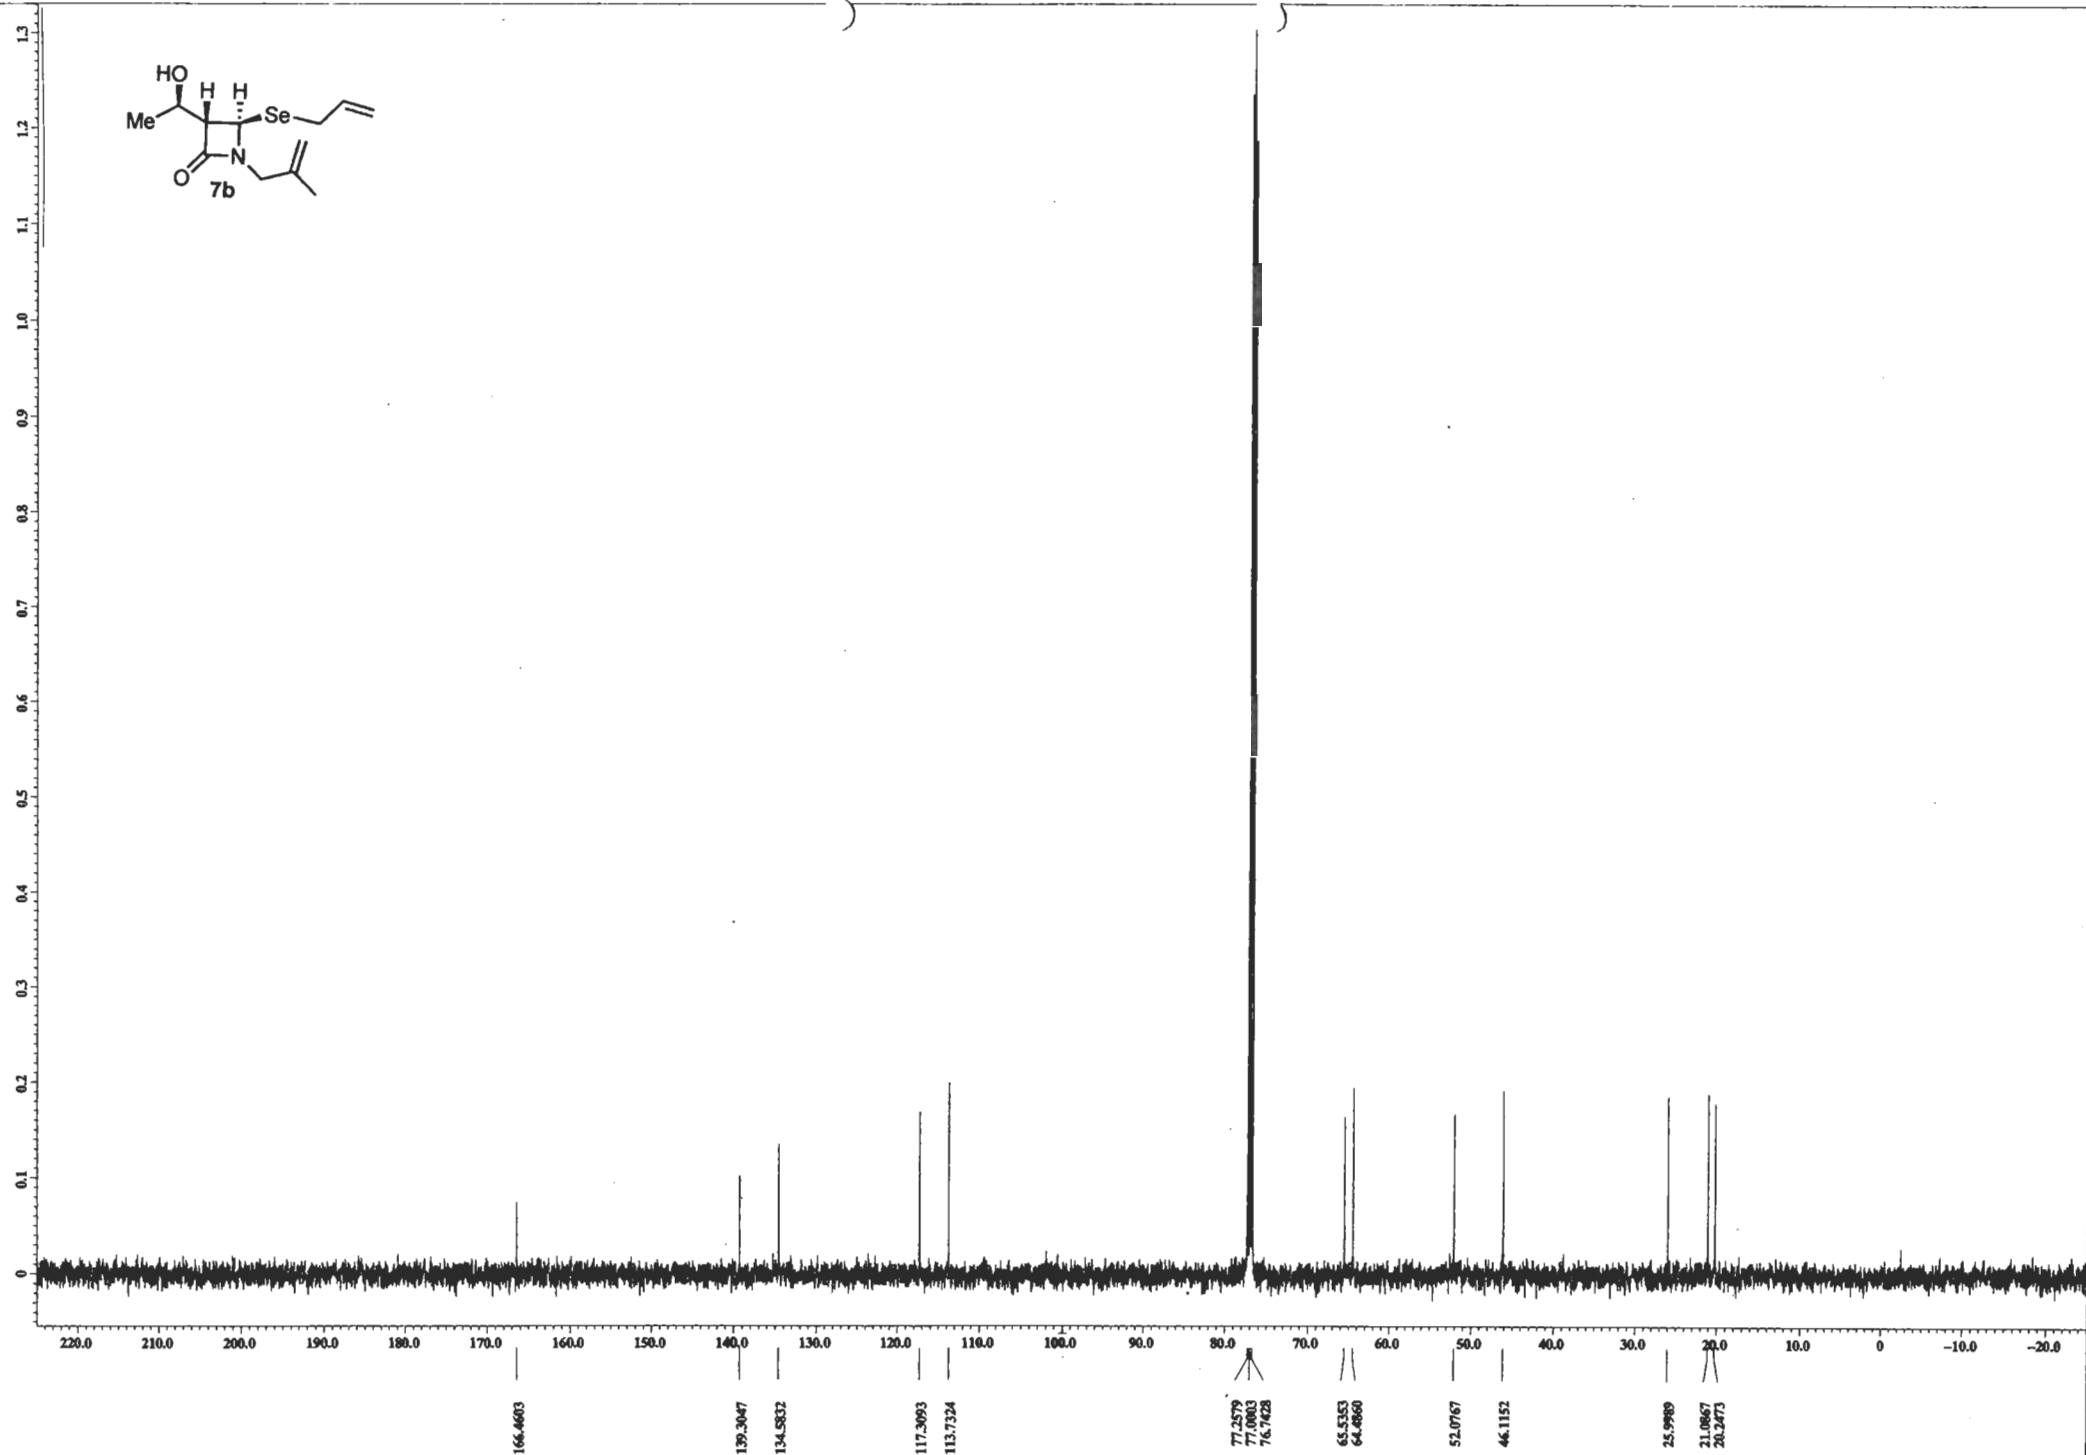

X : parts per Million : 13C

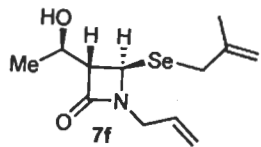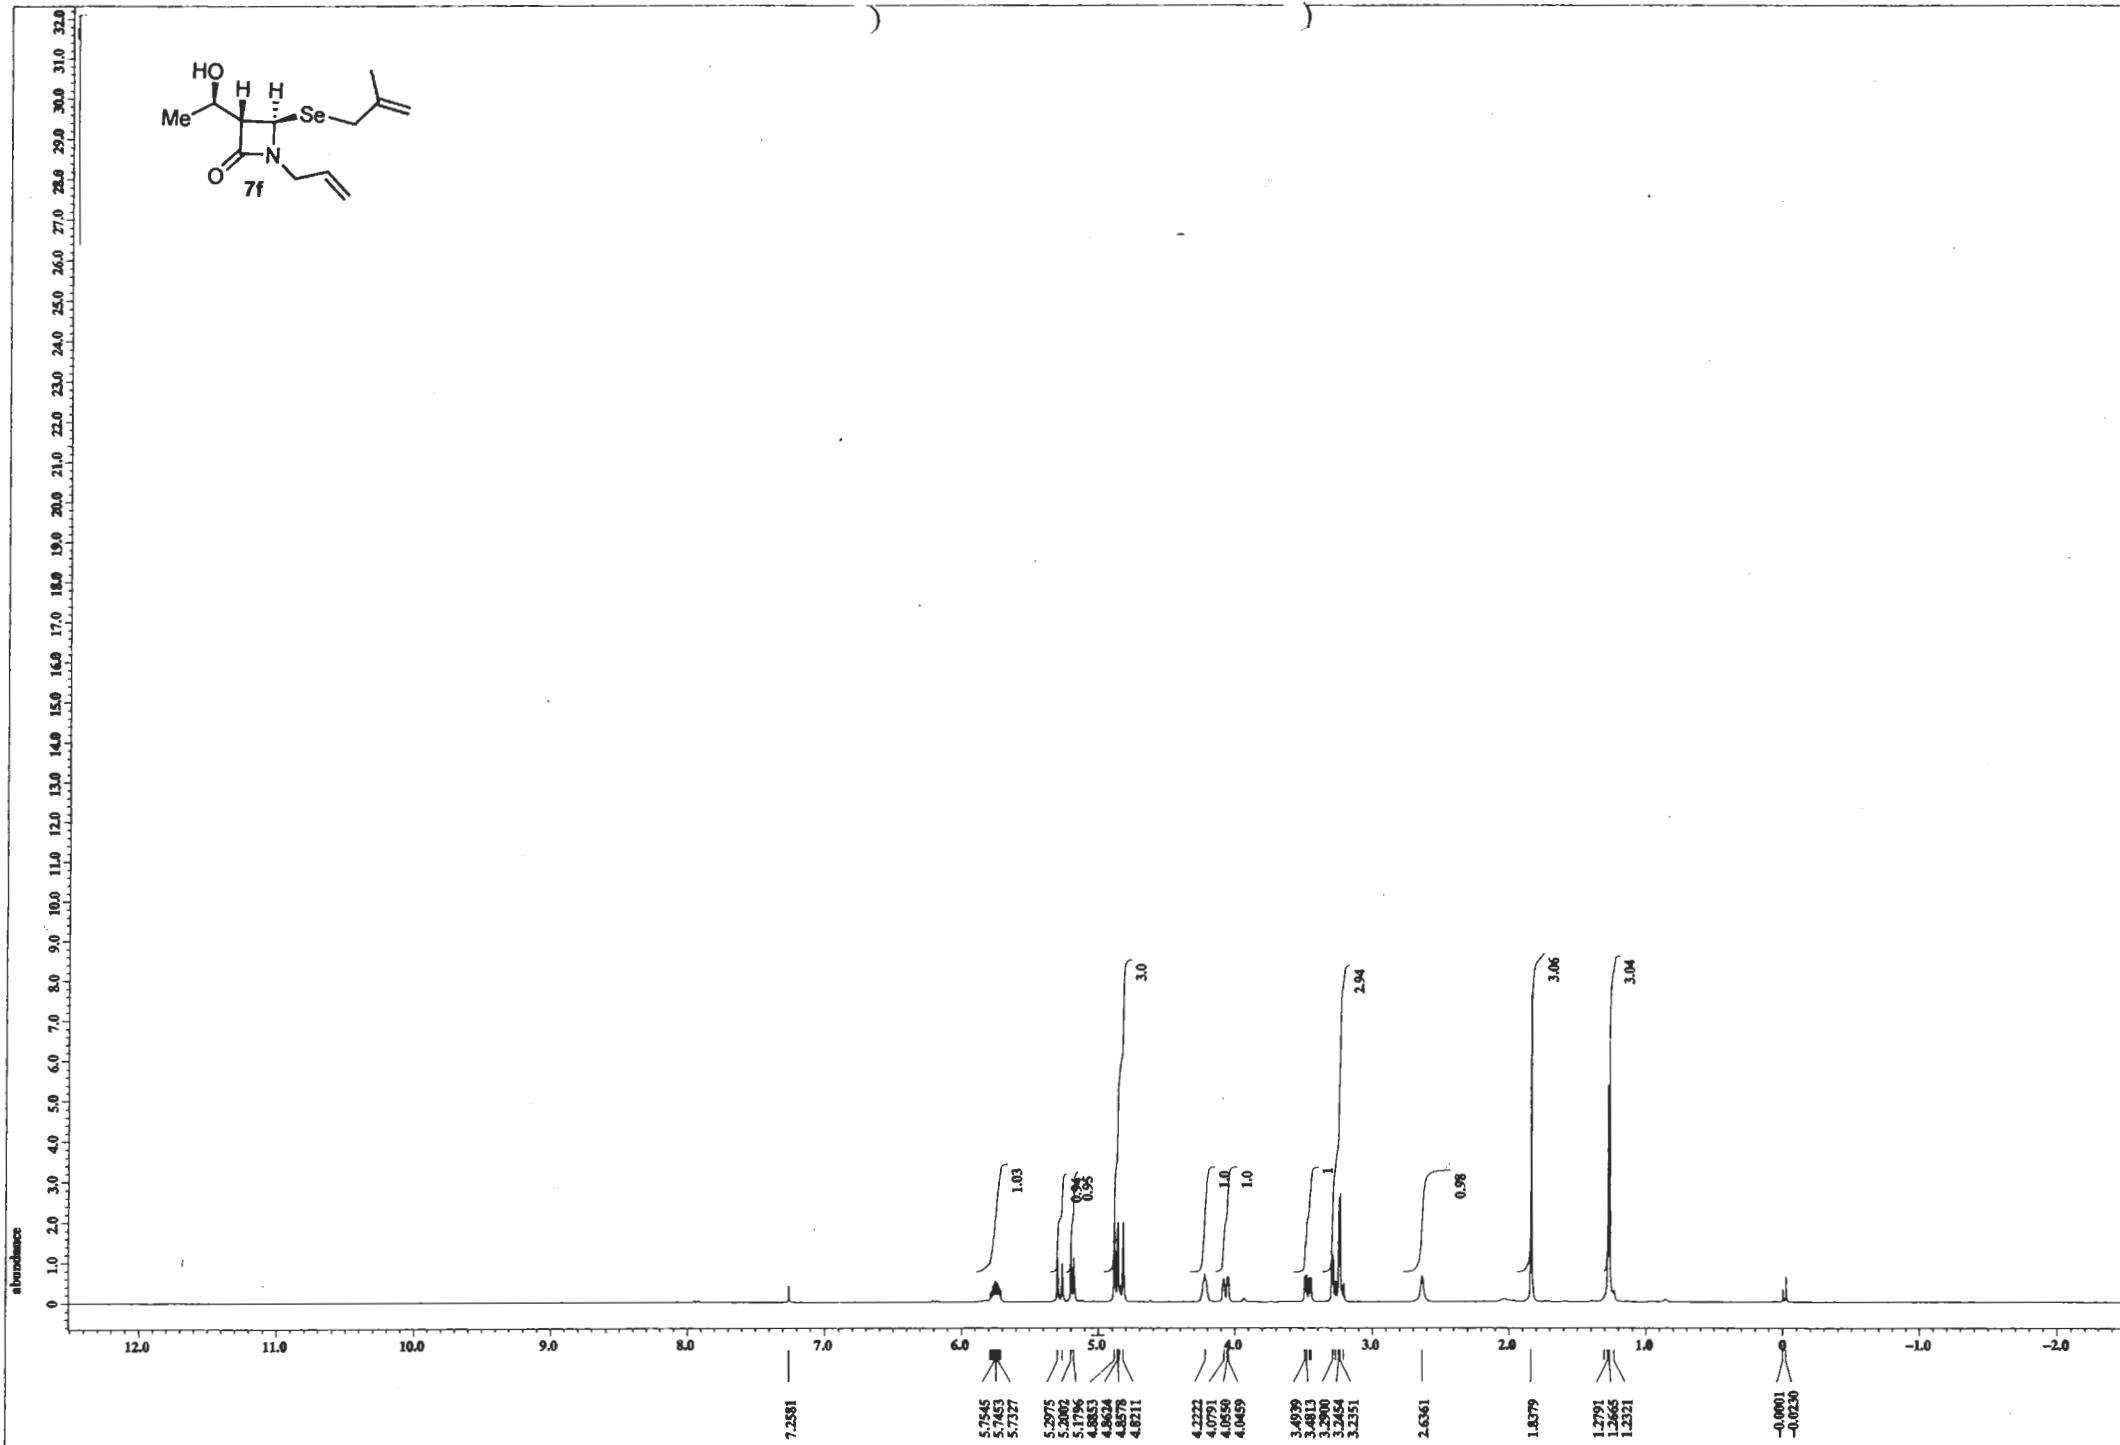

X : parts per Million : 1H

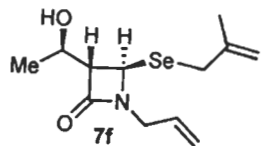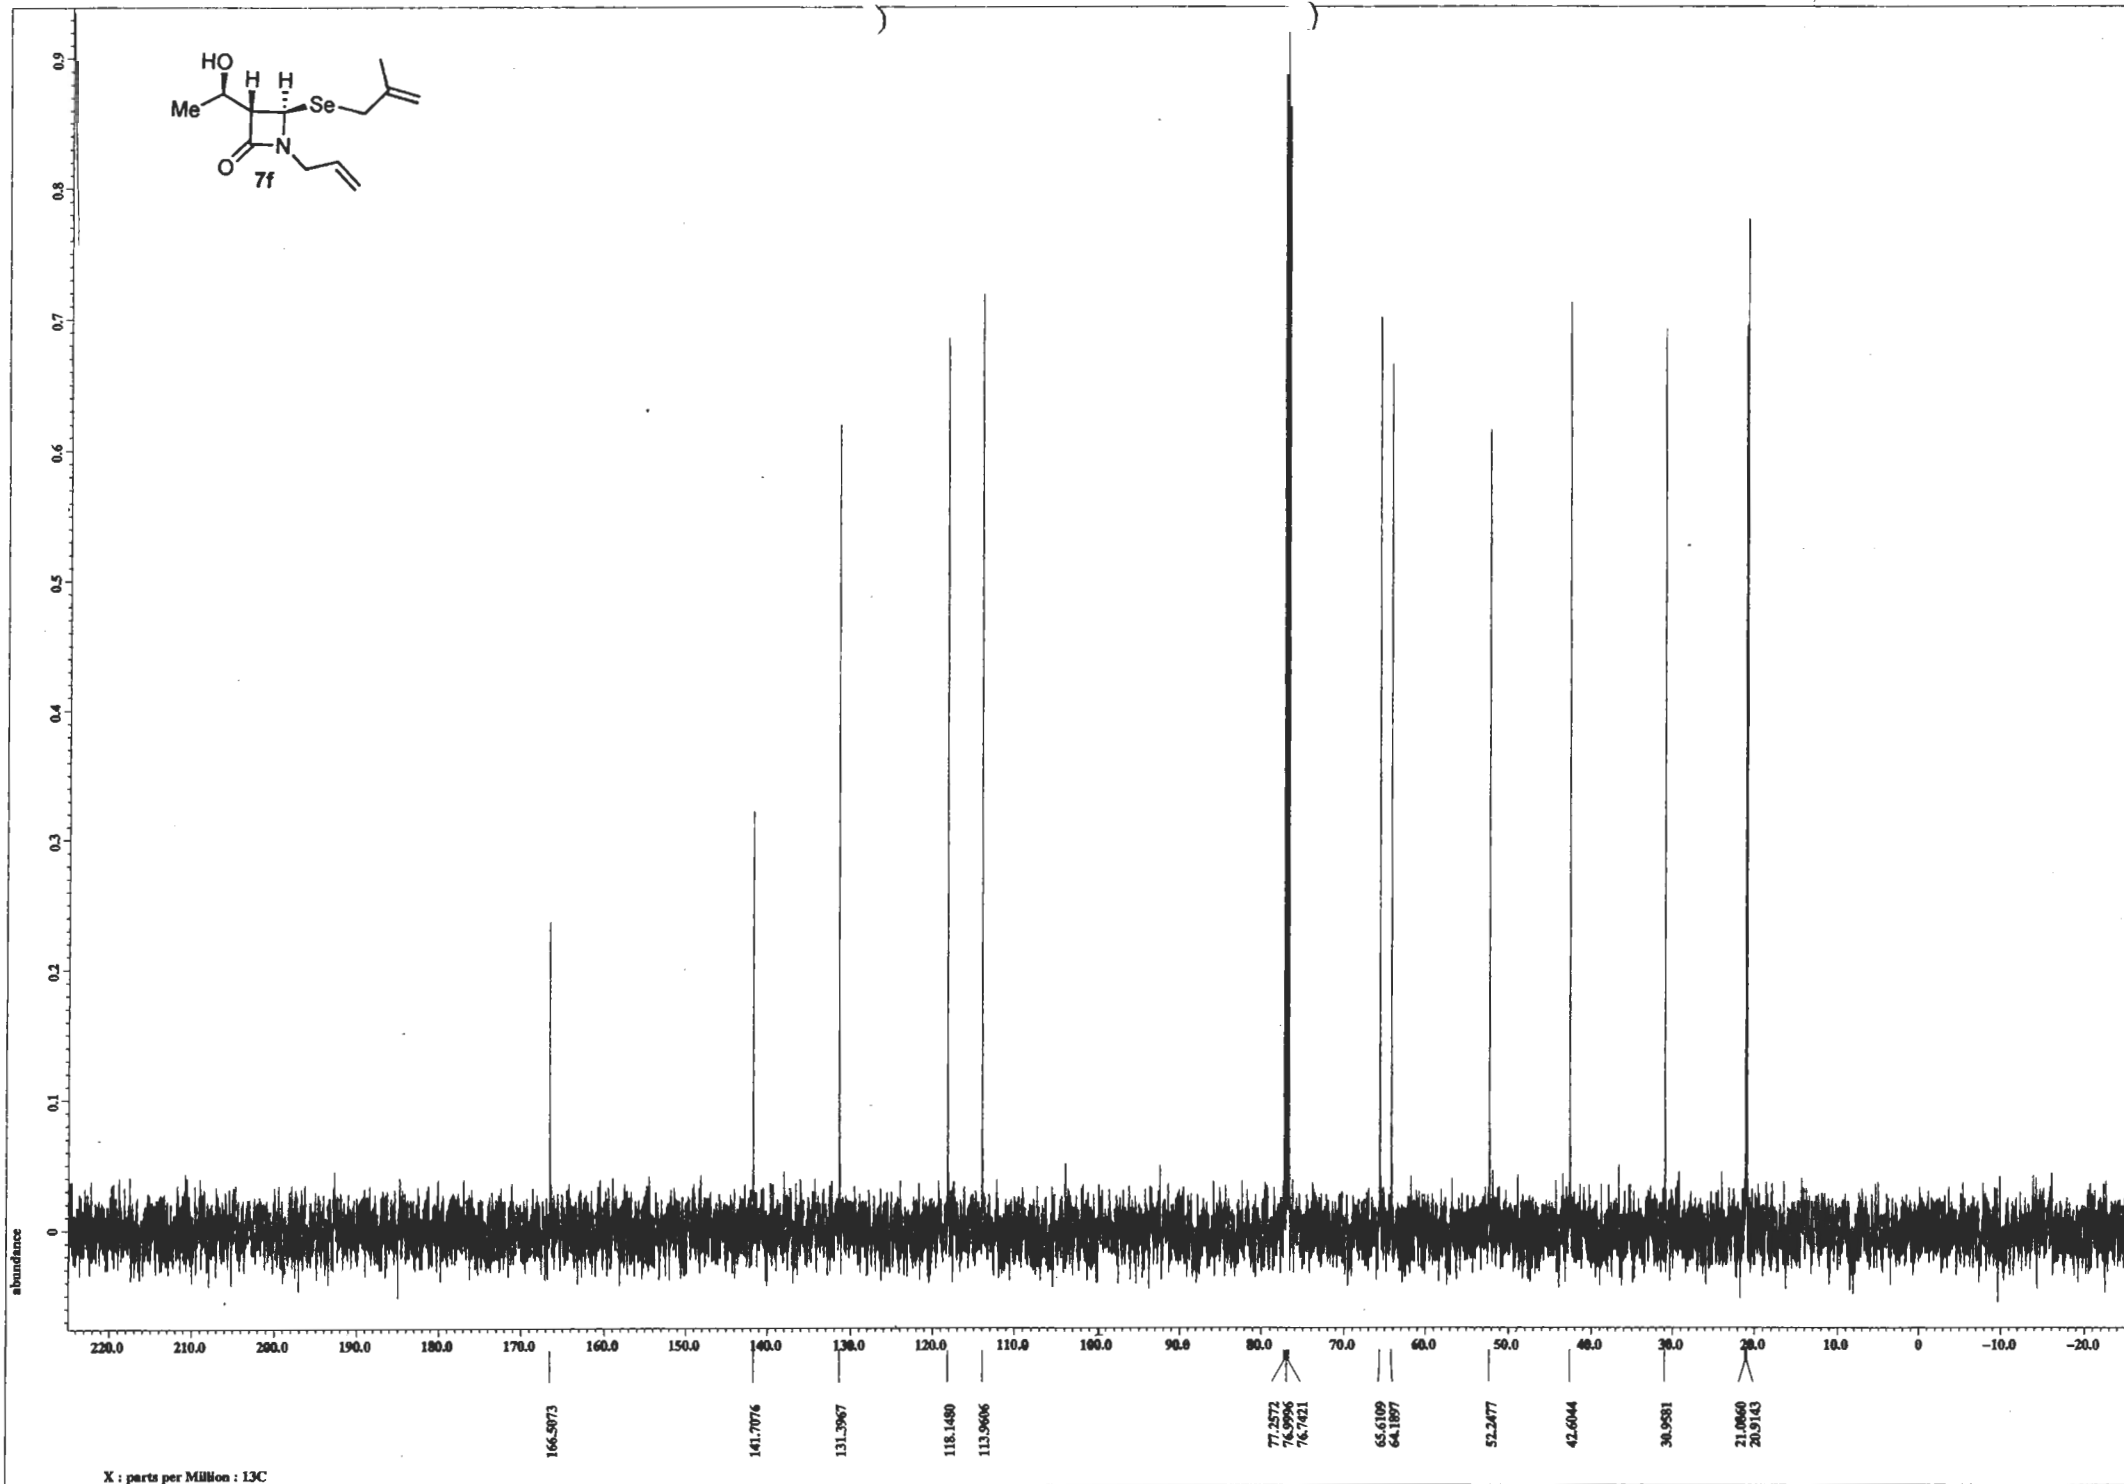

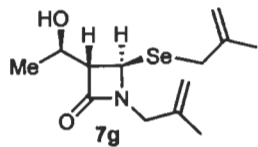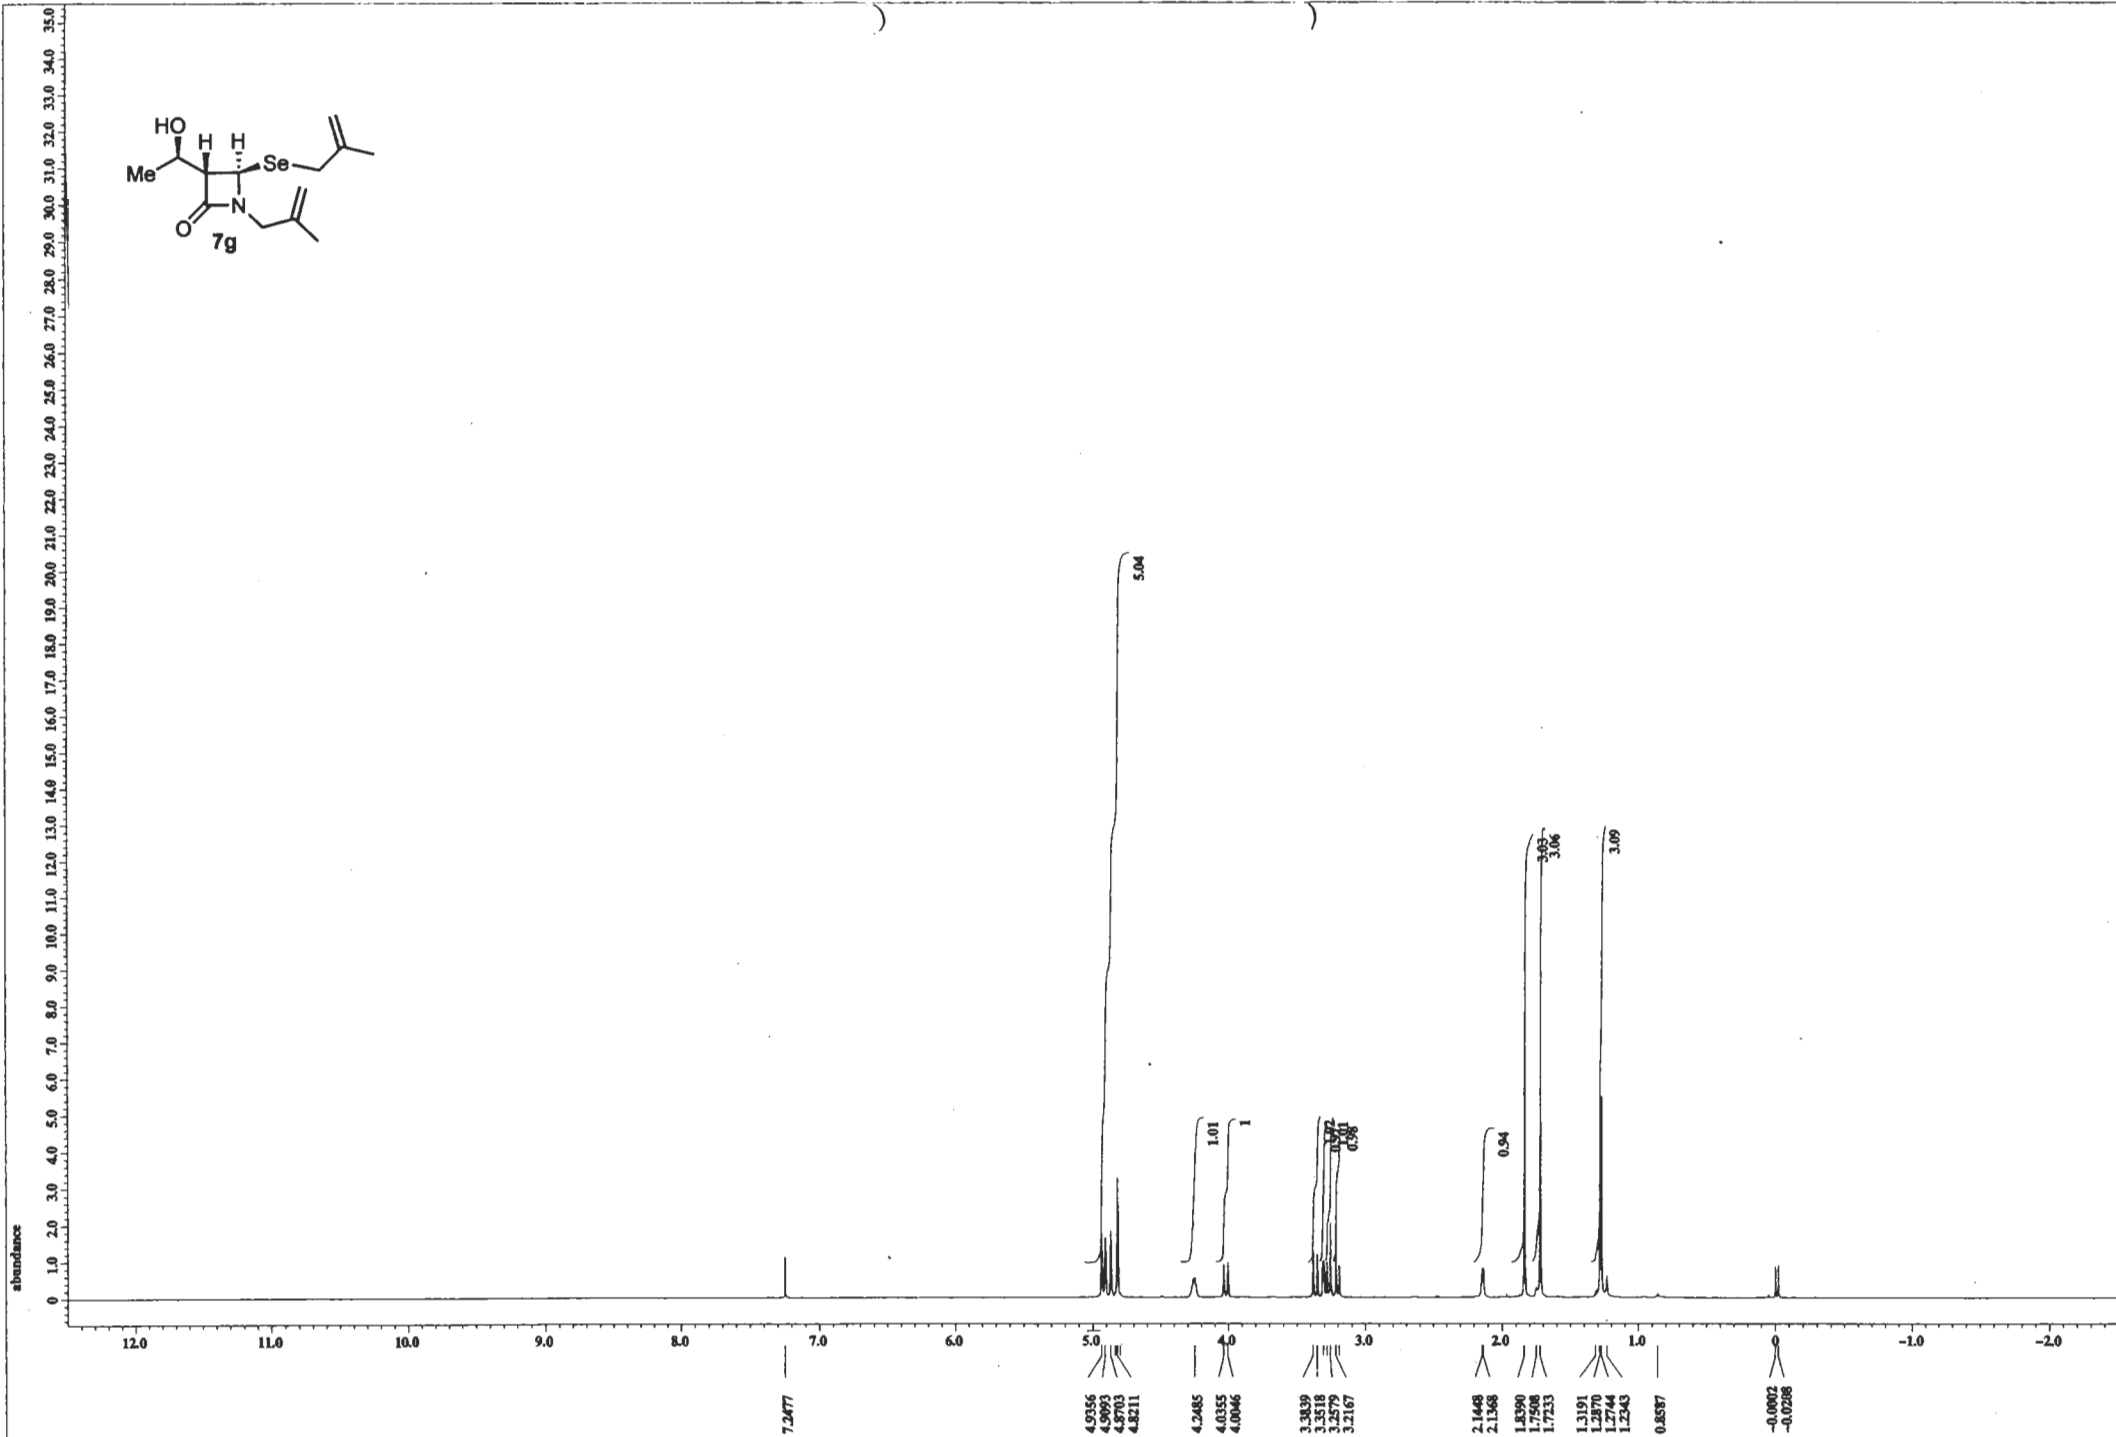

X : parts per Million : 1H



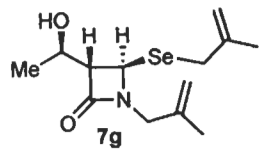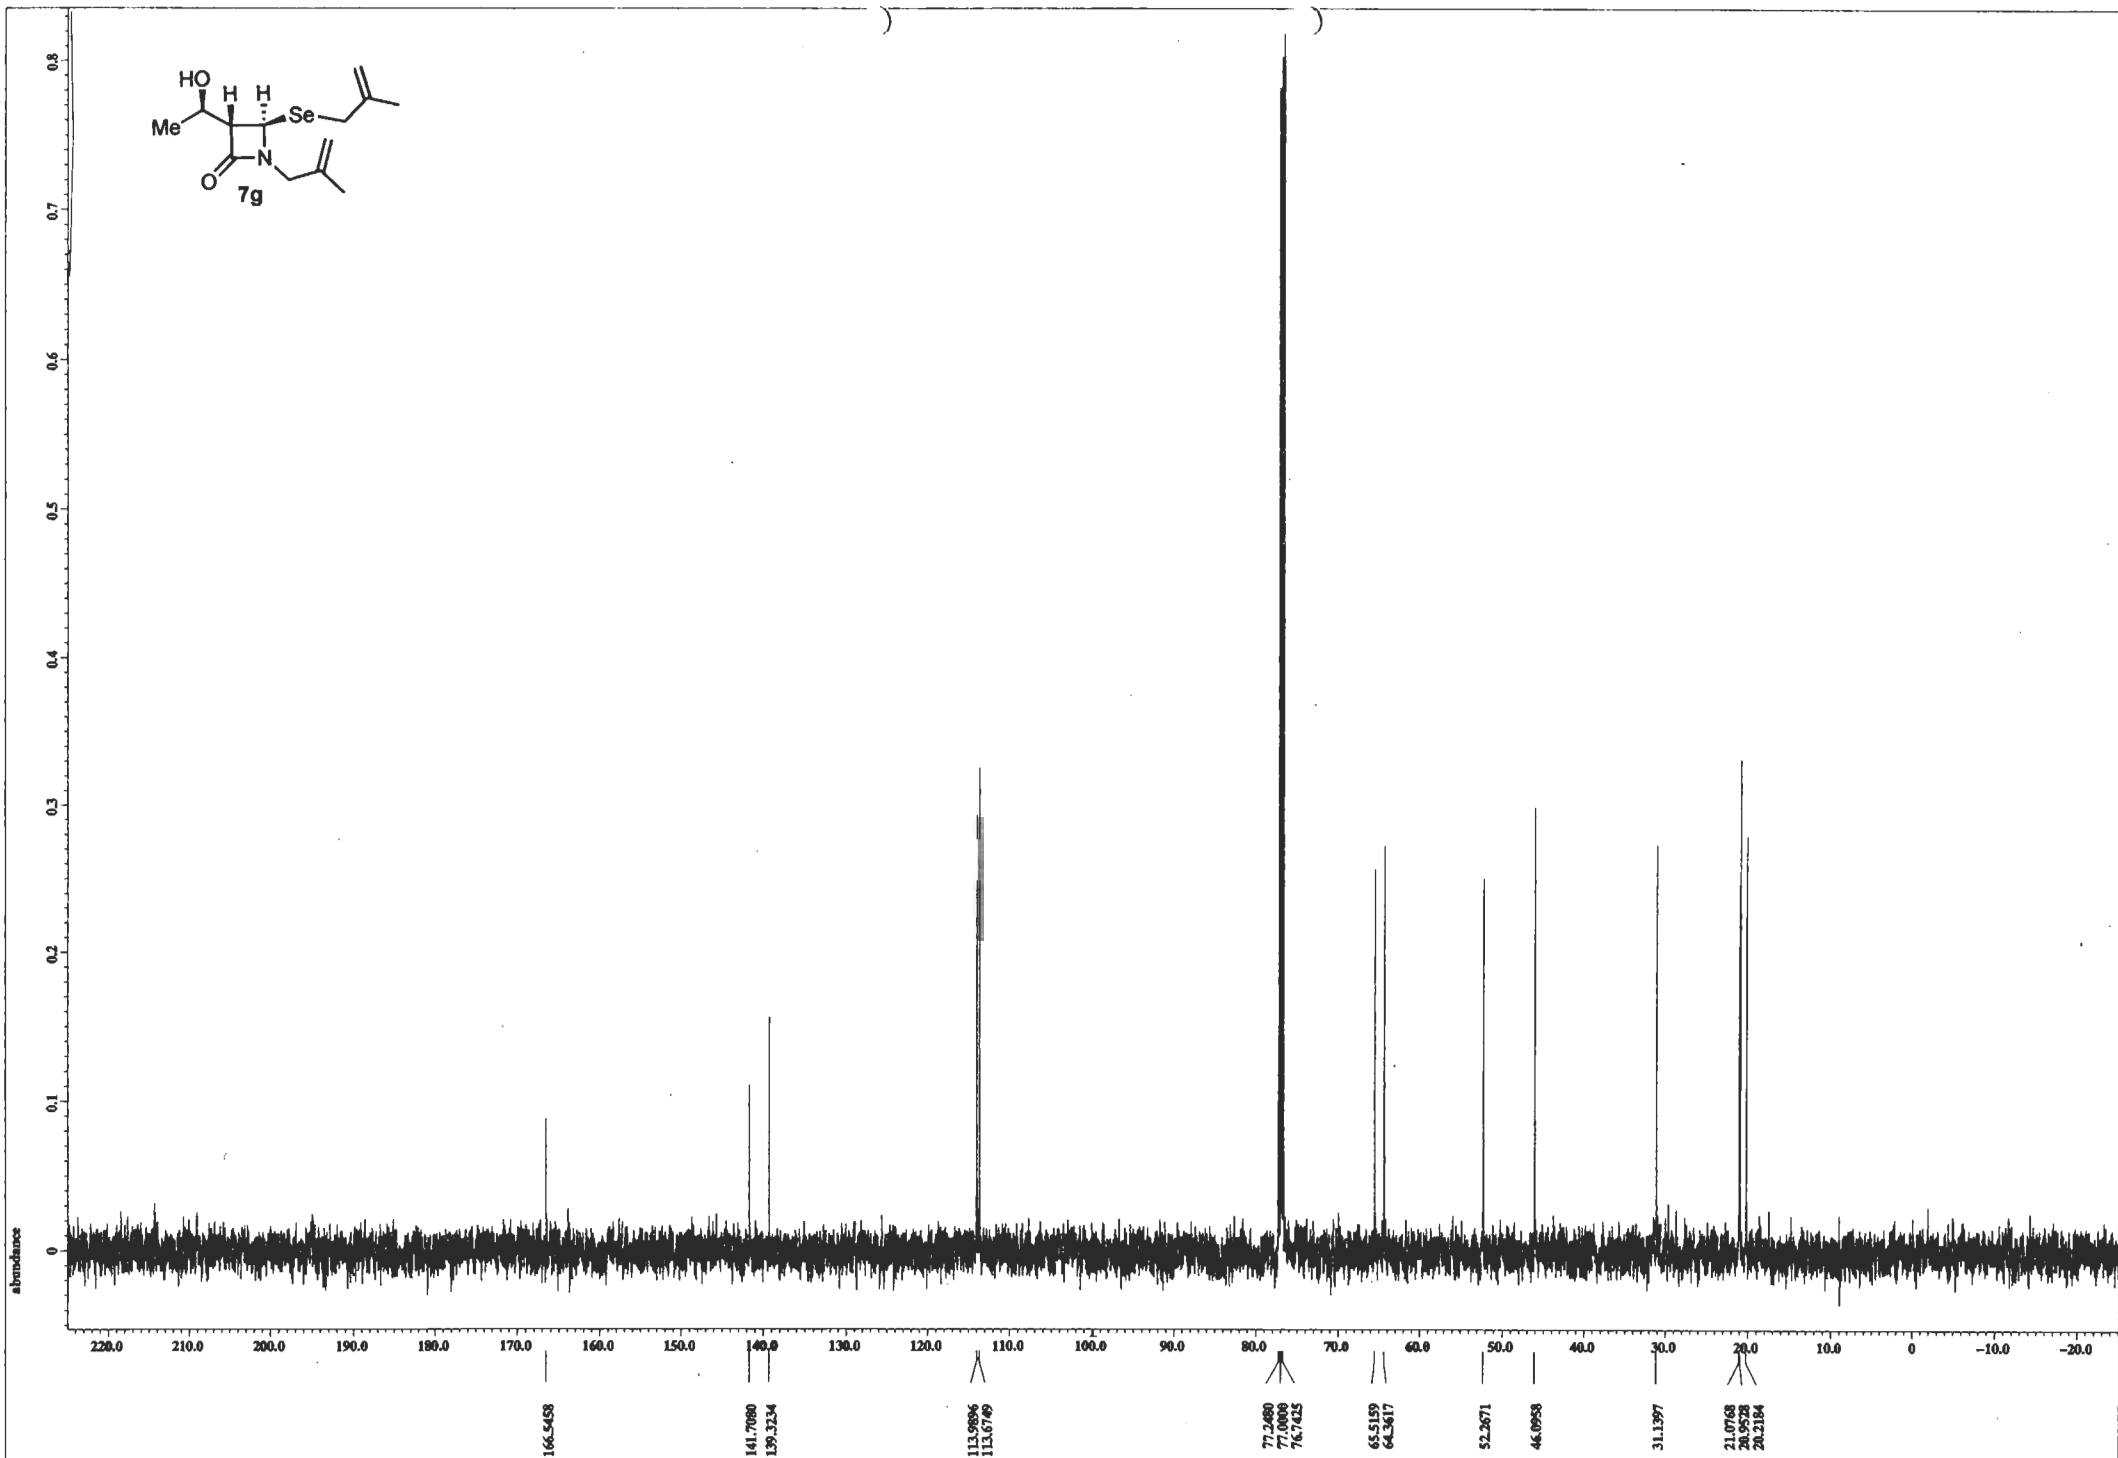

X : parts per Million : 13C

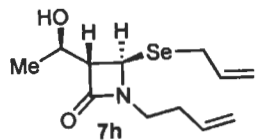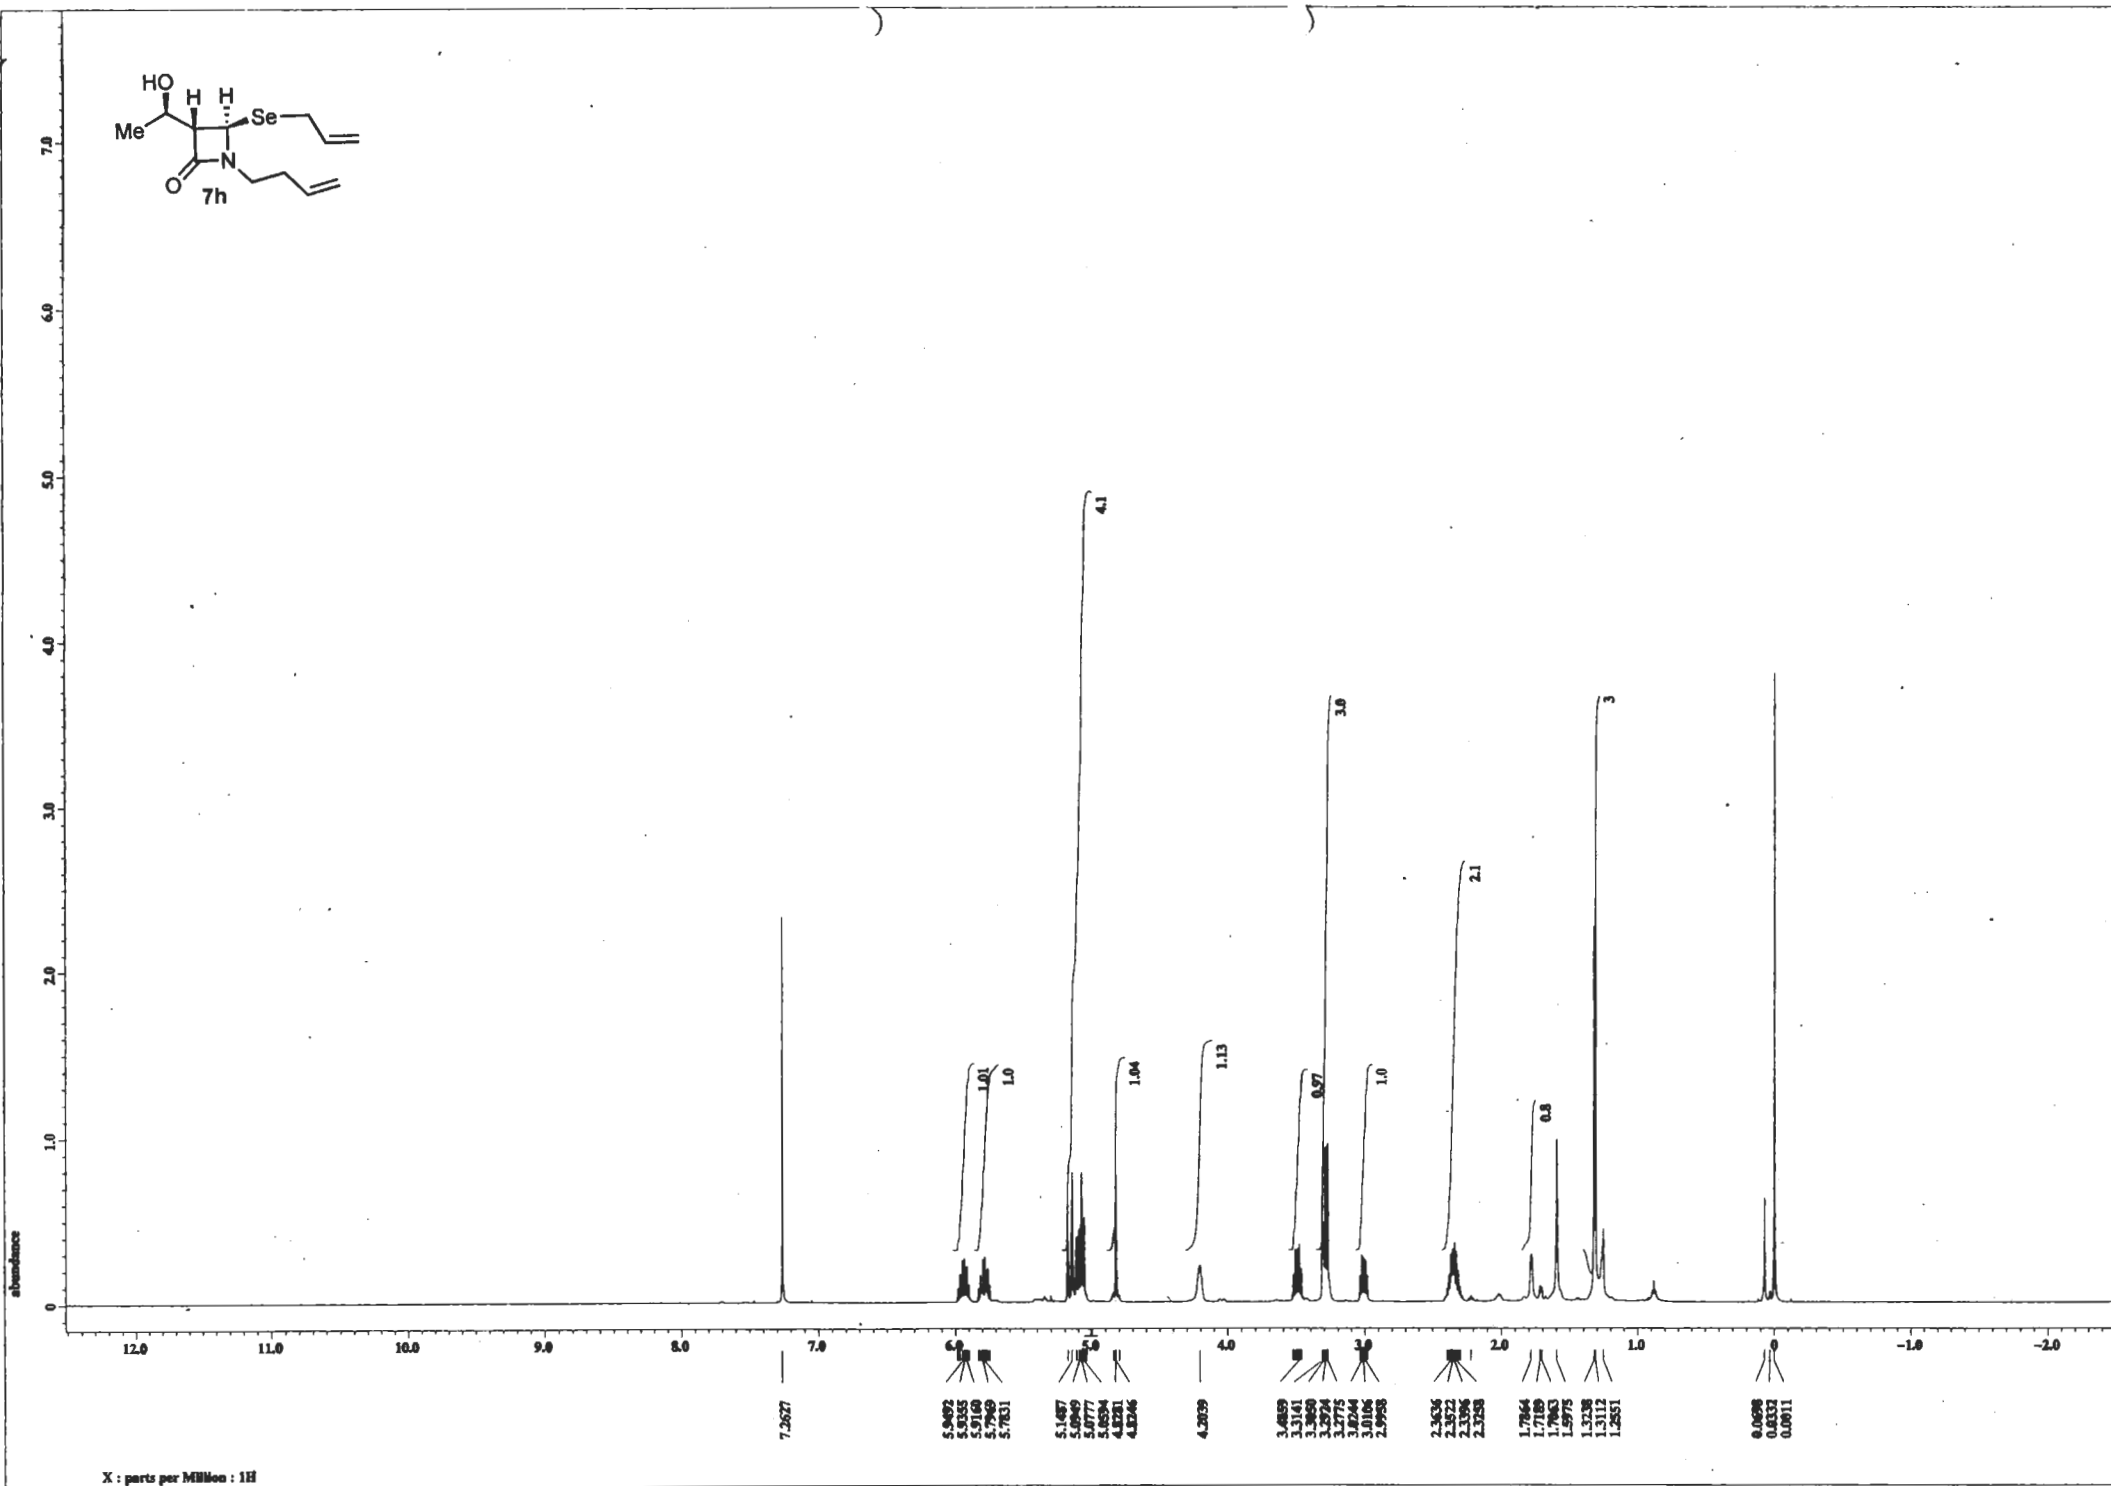

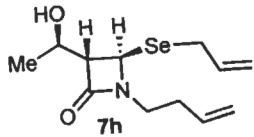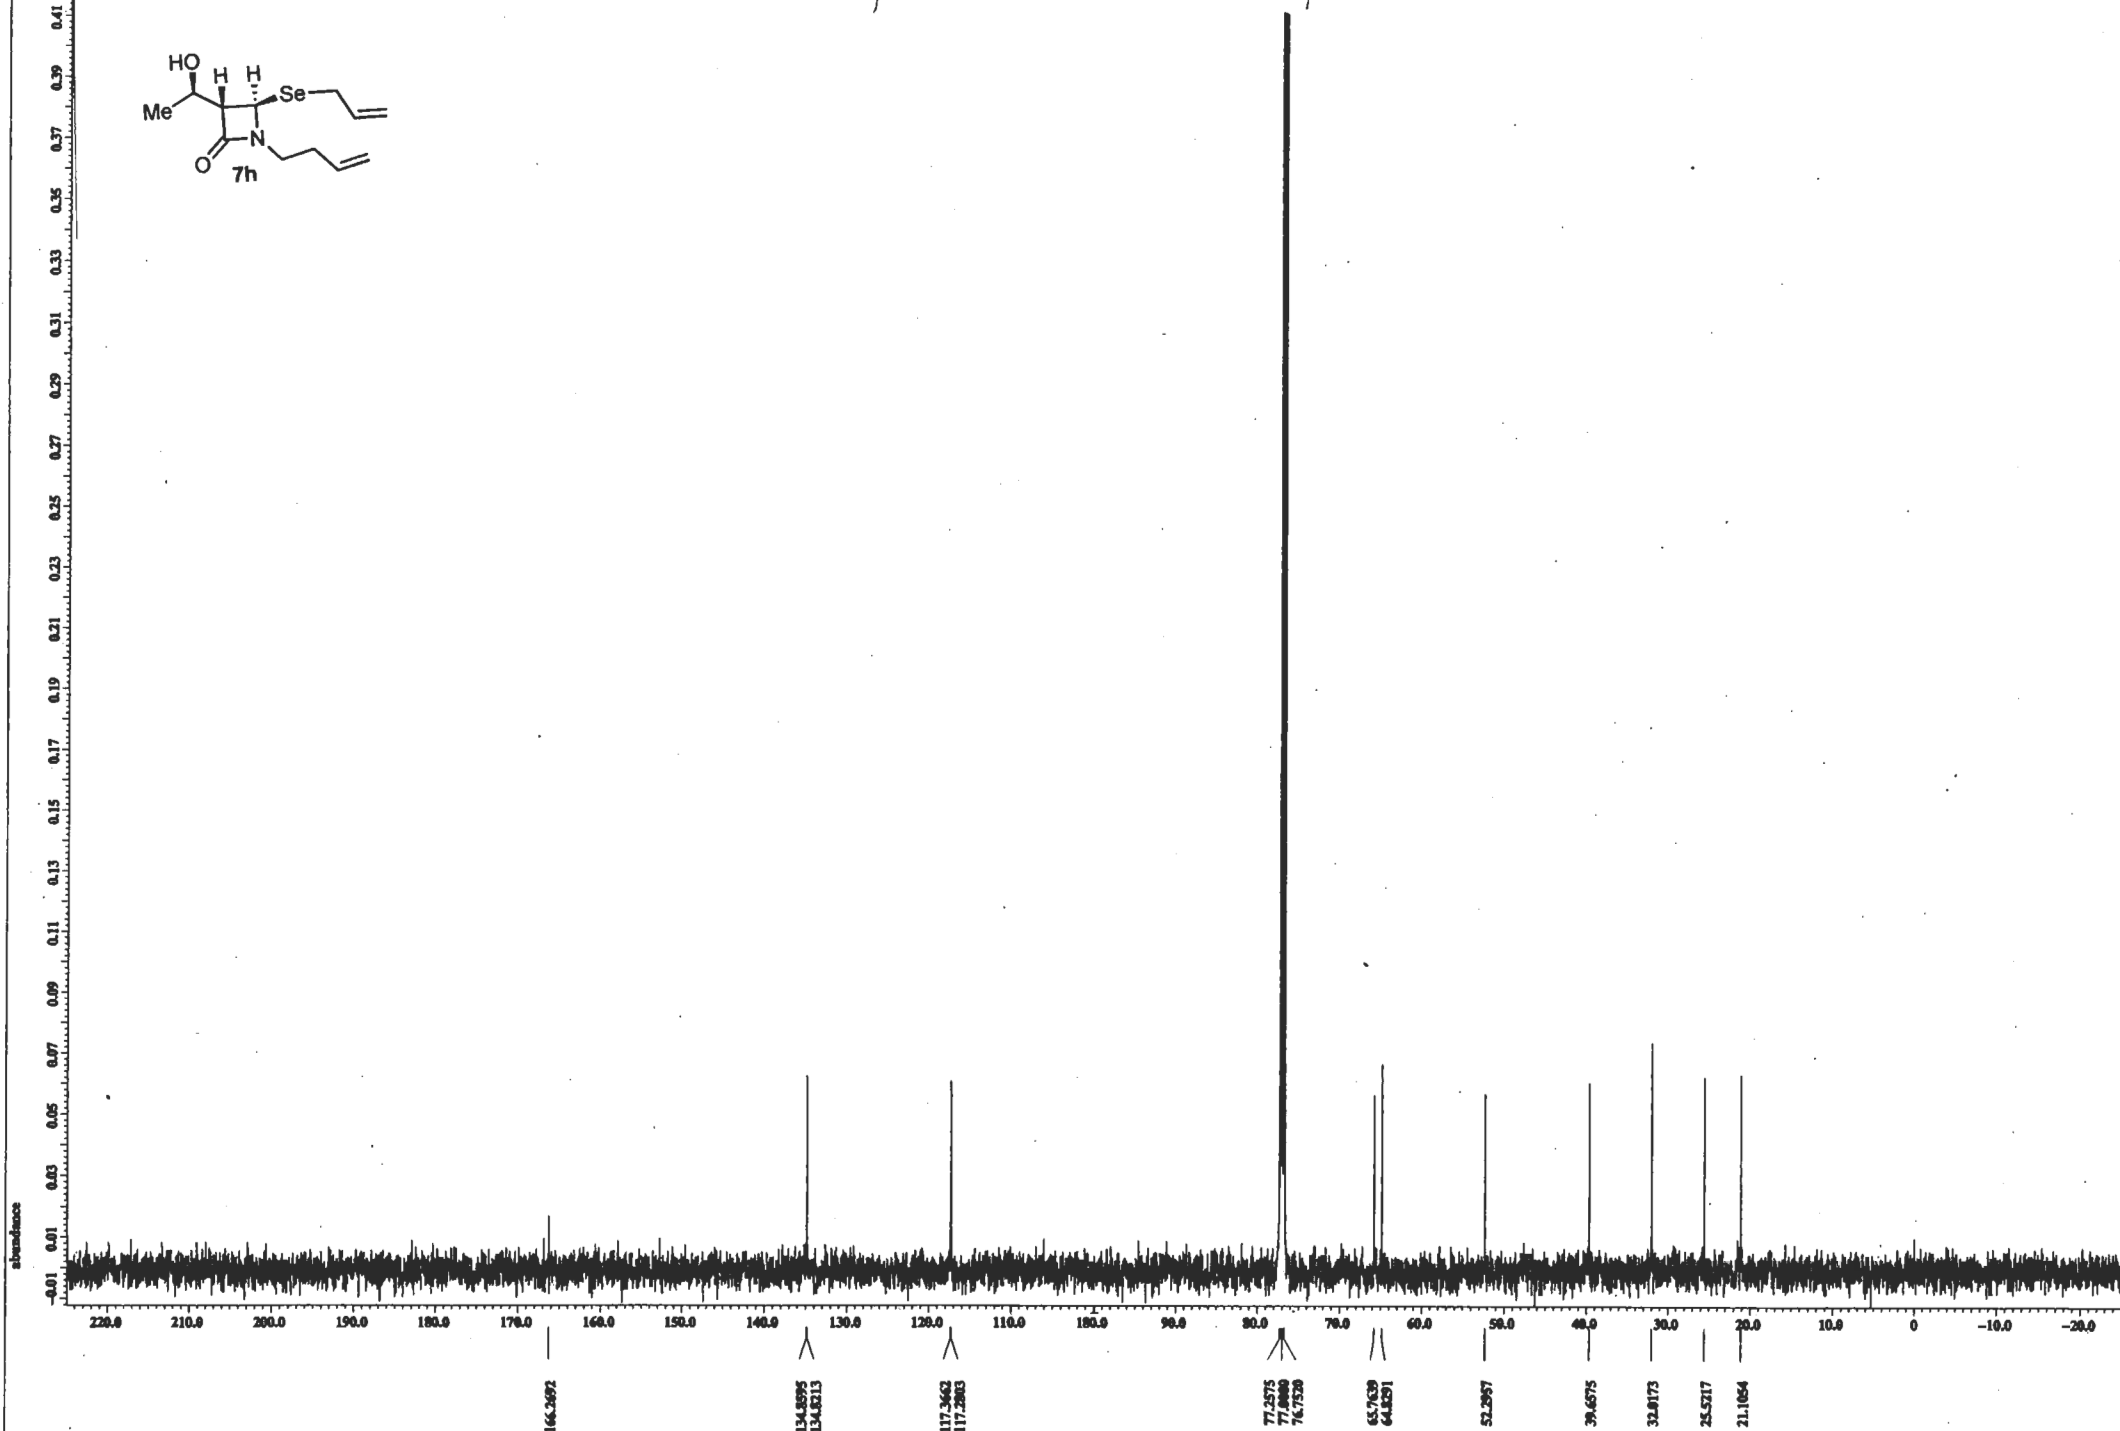

X : parts per Million : 13C

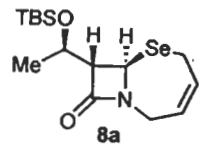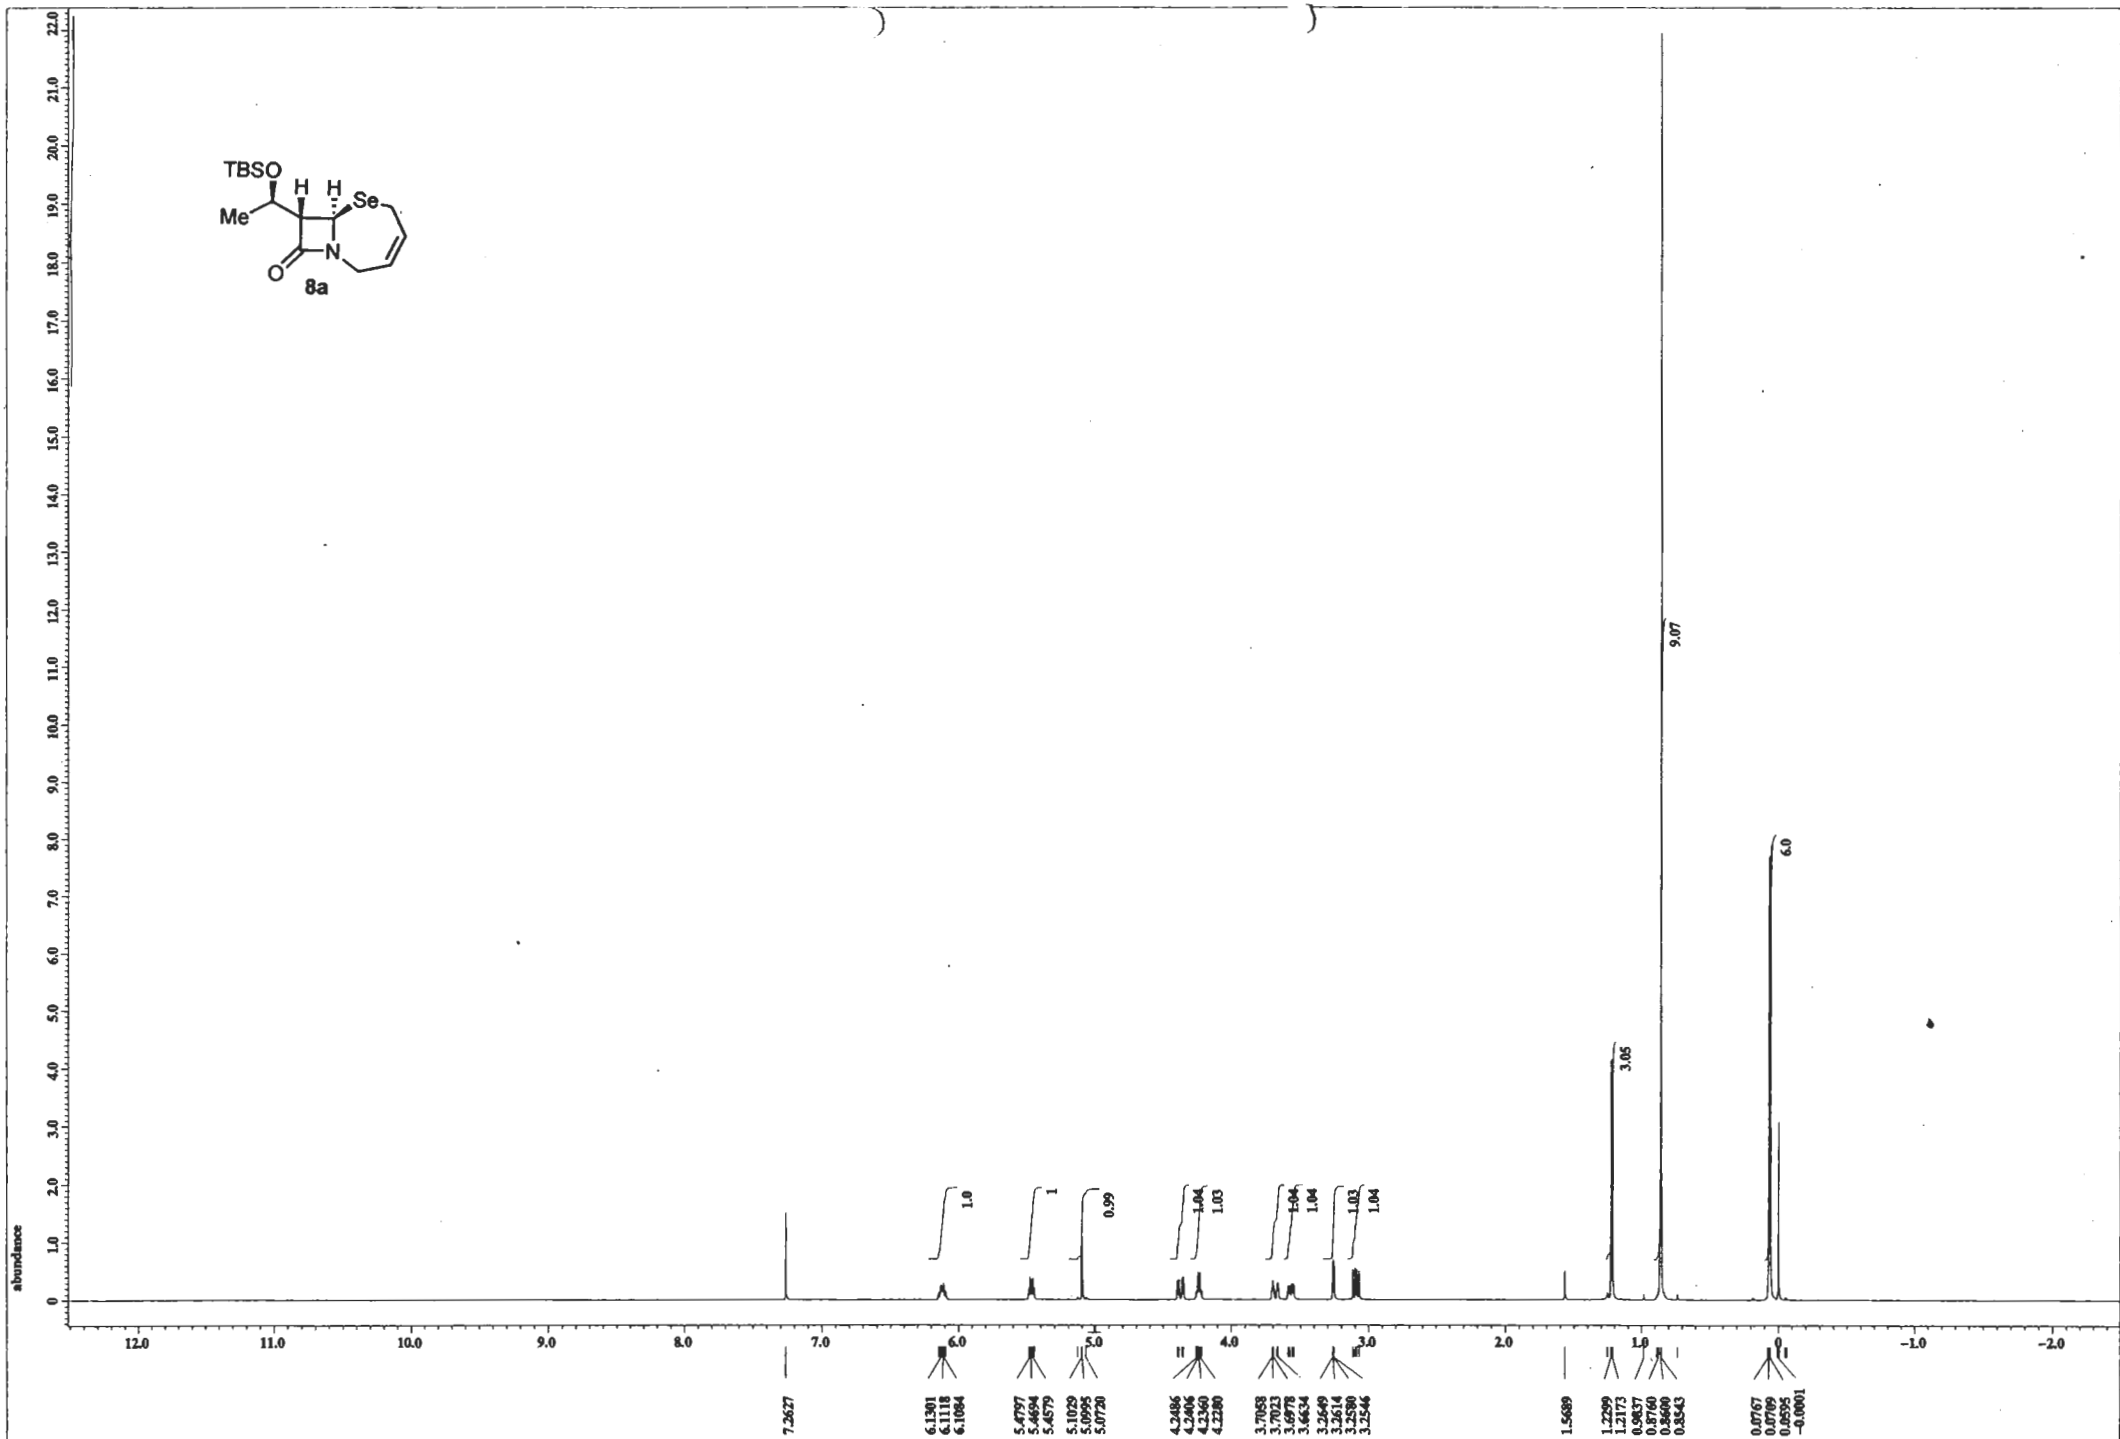

X : parts per Million : 1H

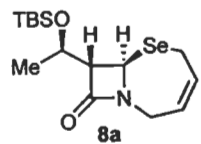

0.6  
0.5  
0.4  
0.3  
0.2  
0.1  
0

220.0 210.0 200.0 190.0 180.0 170.0 160.0 150.0 140.0 130.0 120.0 110.0 100.0 90.0 80.0 70.0 60.0 50.0 40.0 30.0 20.0 10.0 0 -10.0 -20.0

164.2124  
131.9907  
125.2929  
77.2579  
77.0004  
76.7524  
68.4731  
64.7818  
49.5014  
40.5449  
25.6556  
22.4603  
17.8723  
16.2794  
-0.0120  
-4.2184  
-5.1436

X : parts per Million : 13C

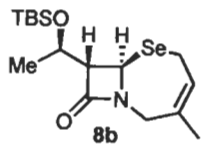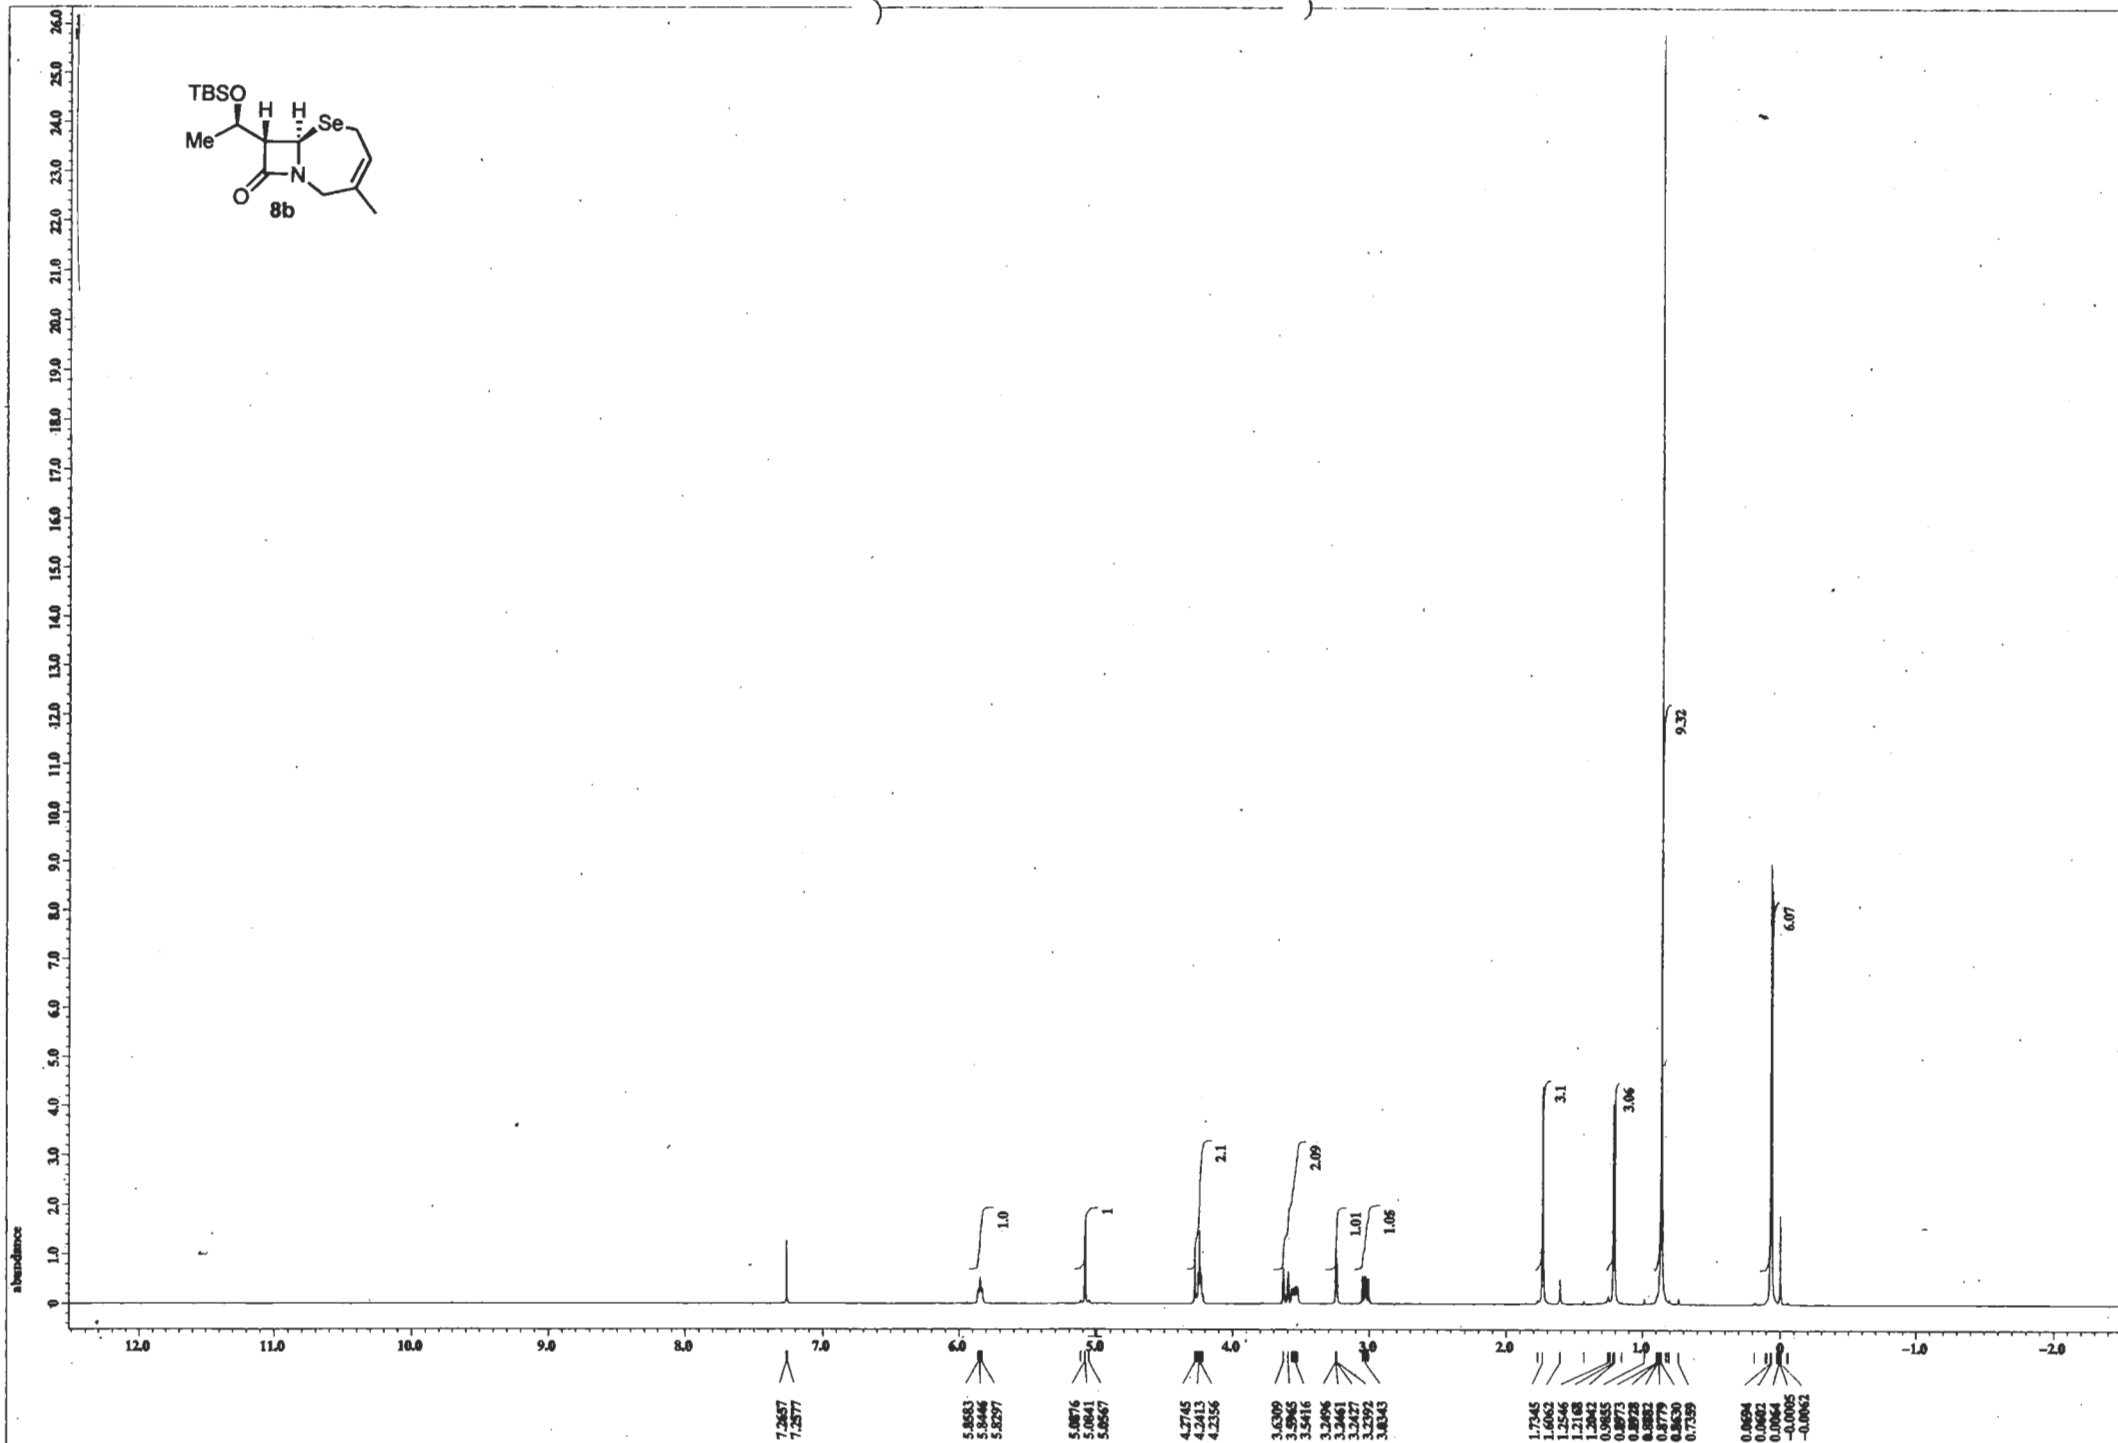

X : parts per Million : 1H

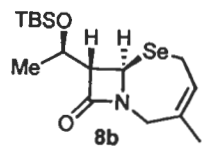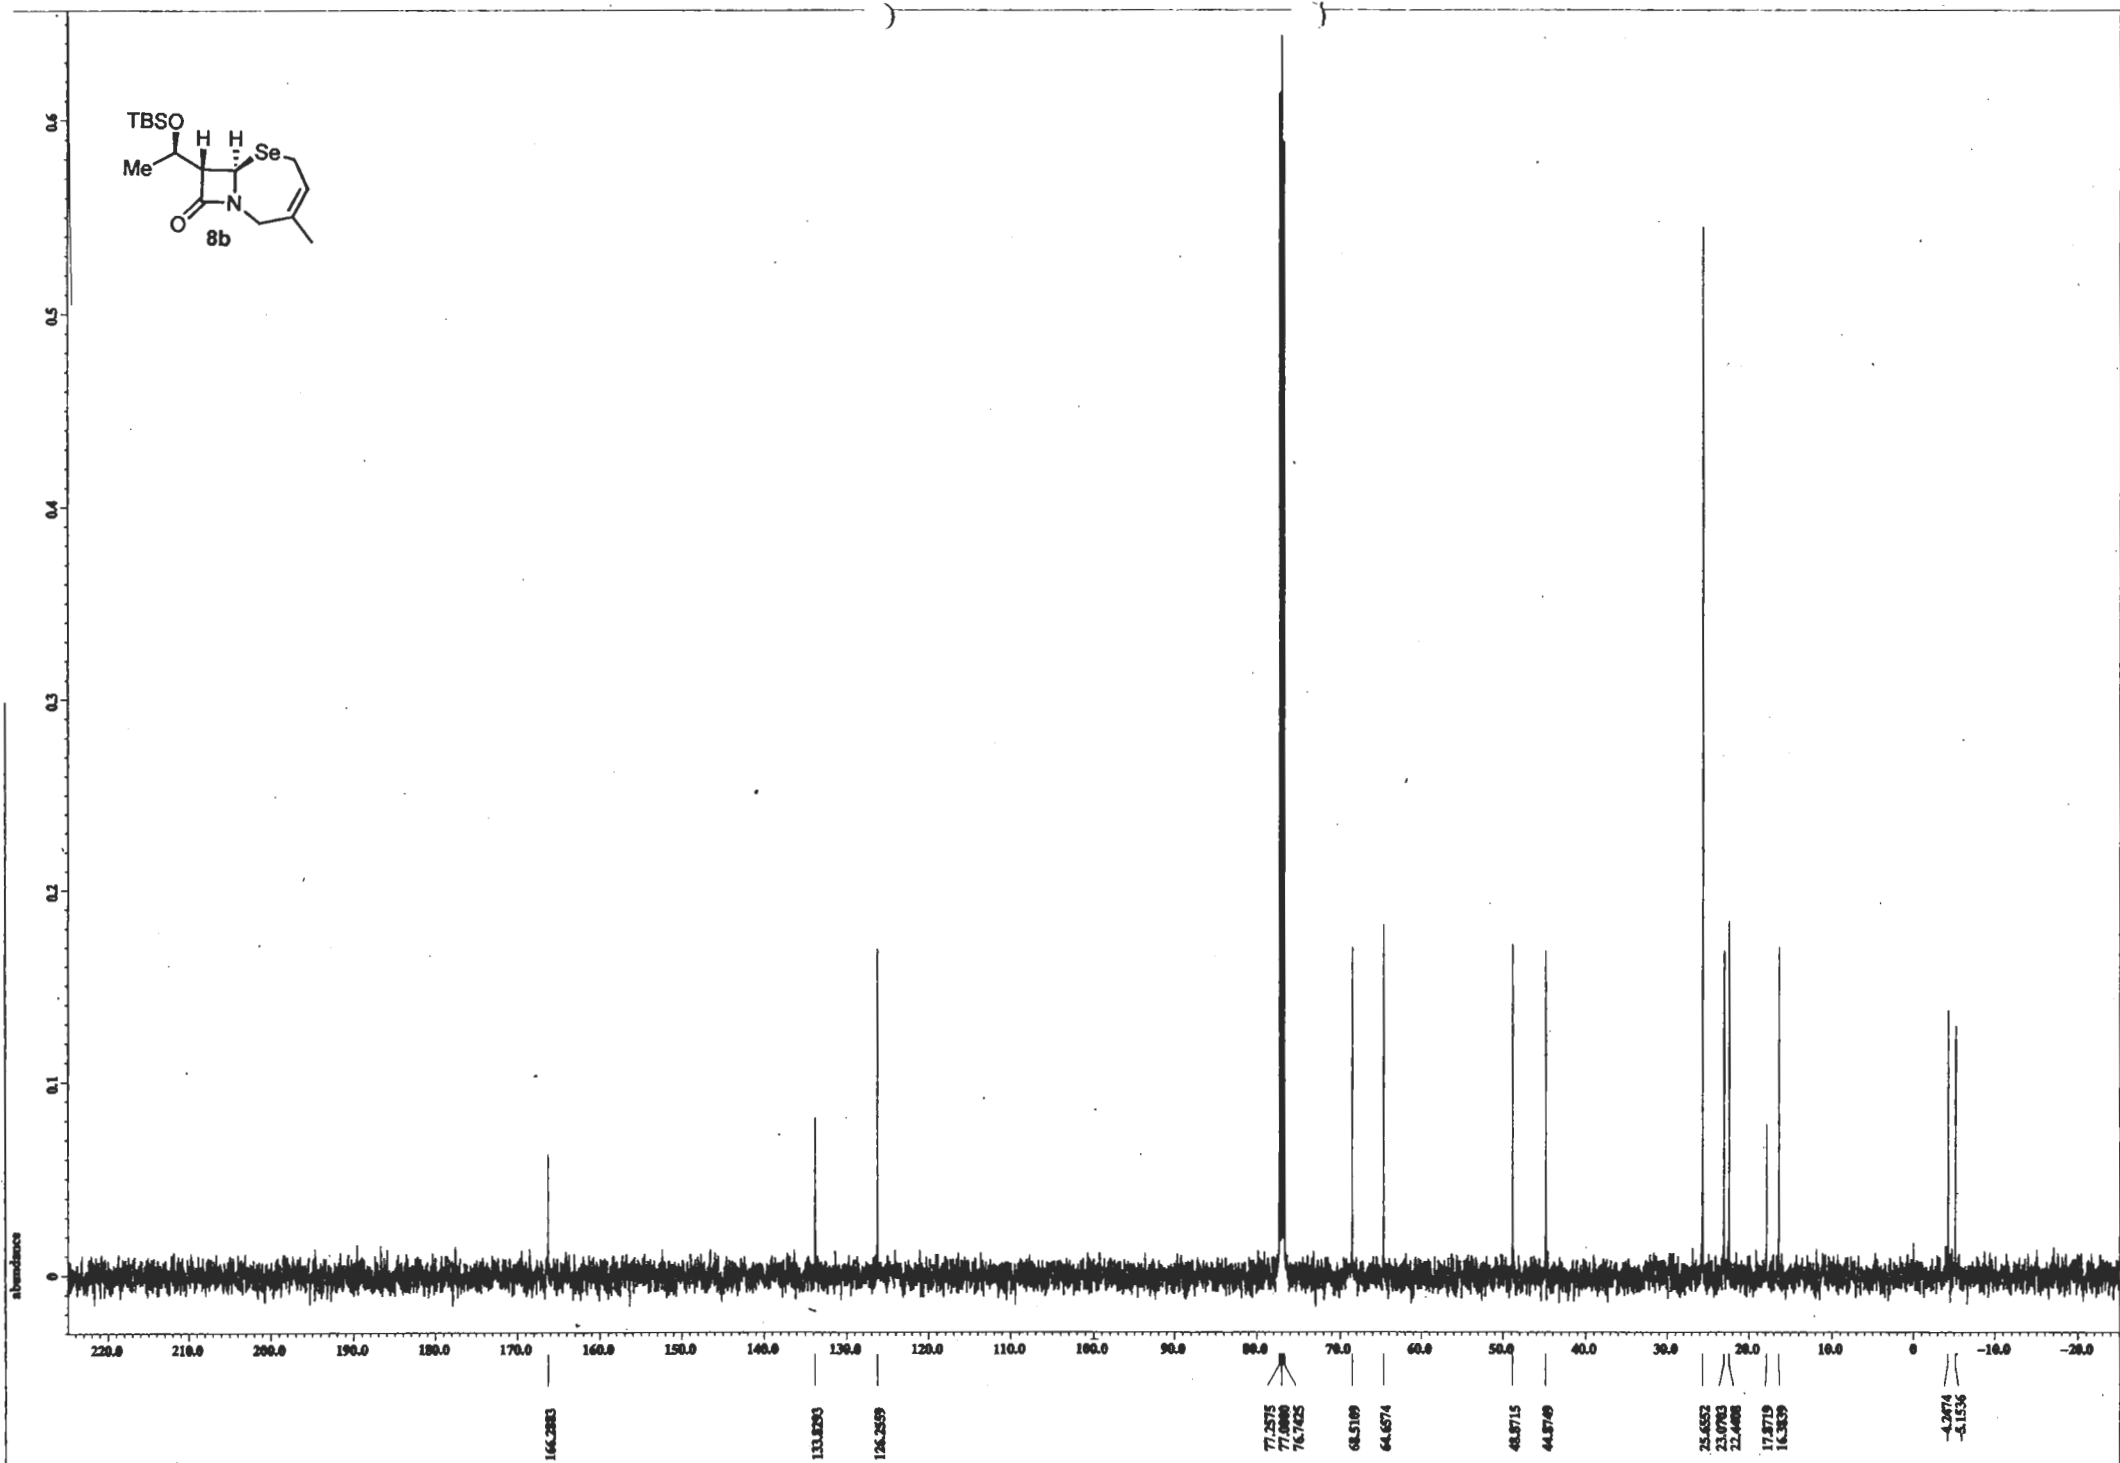

X : parts per Million : 13C

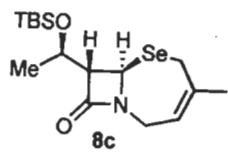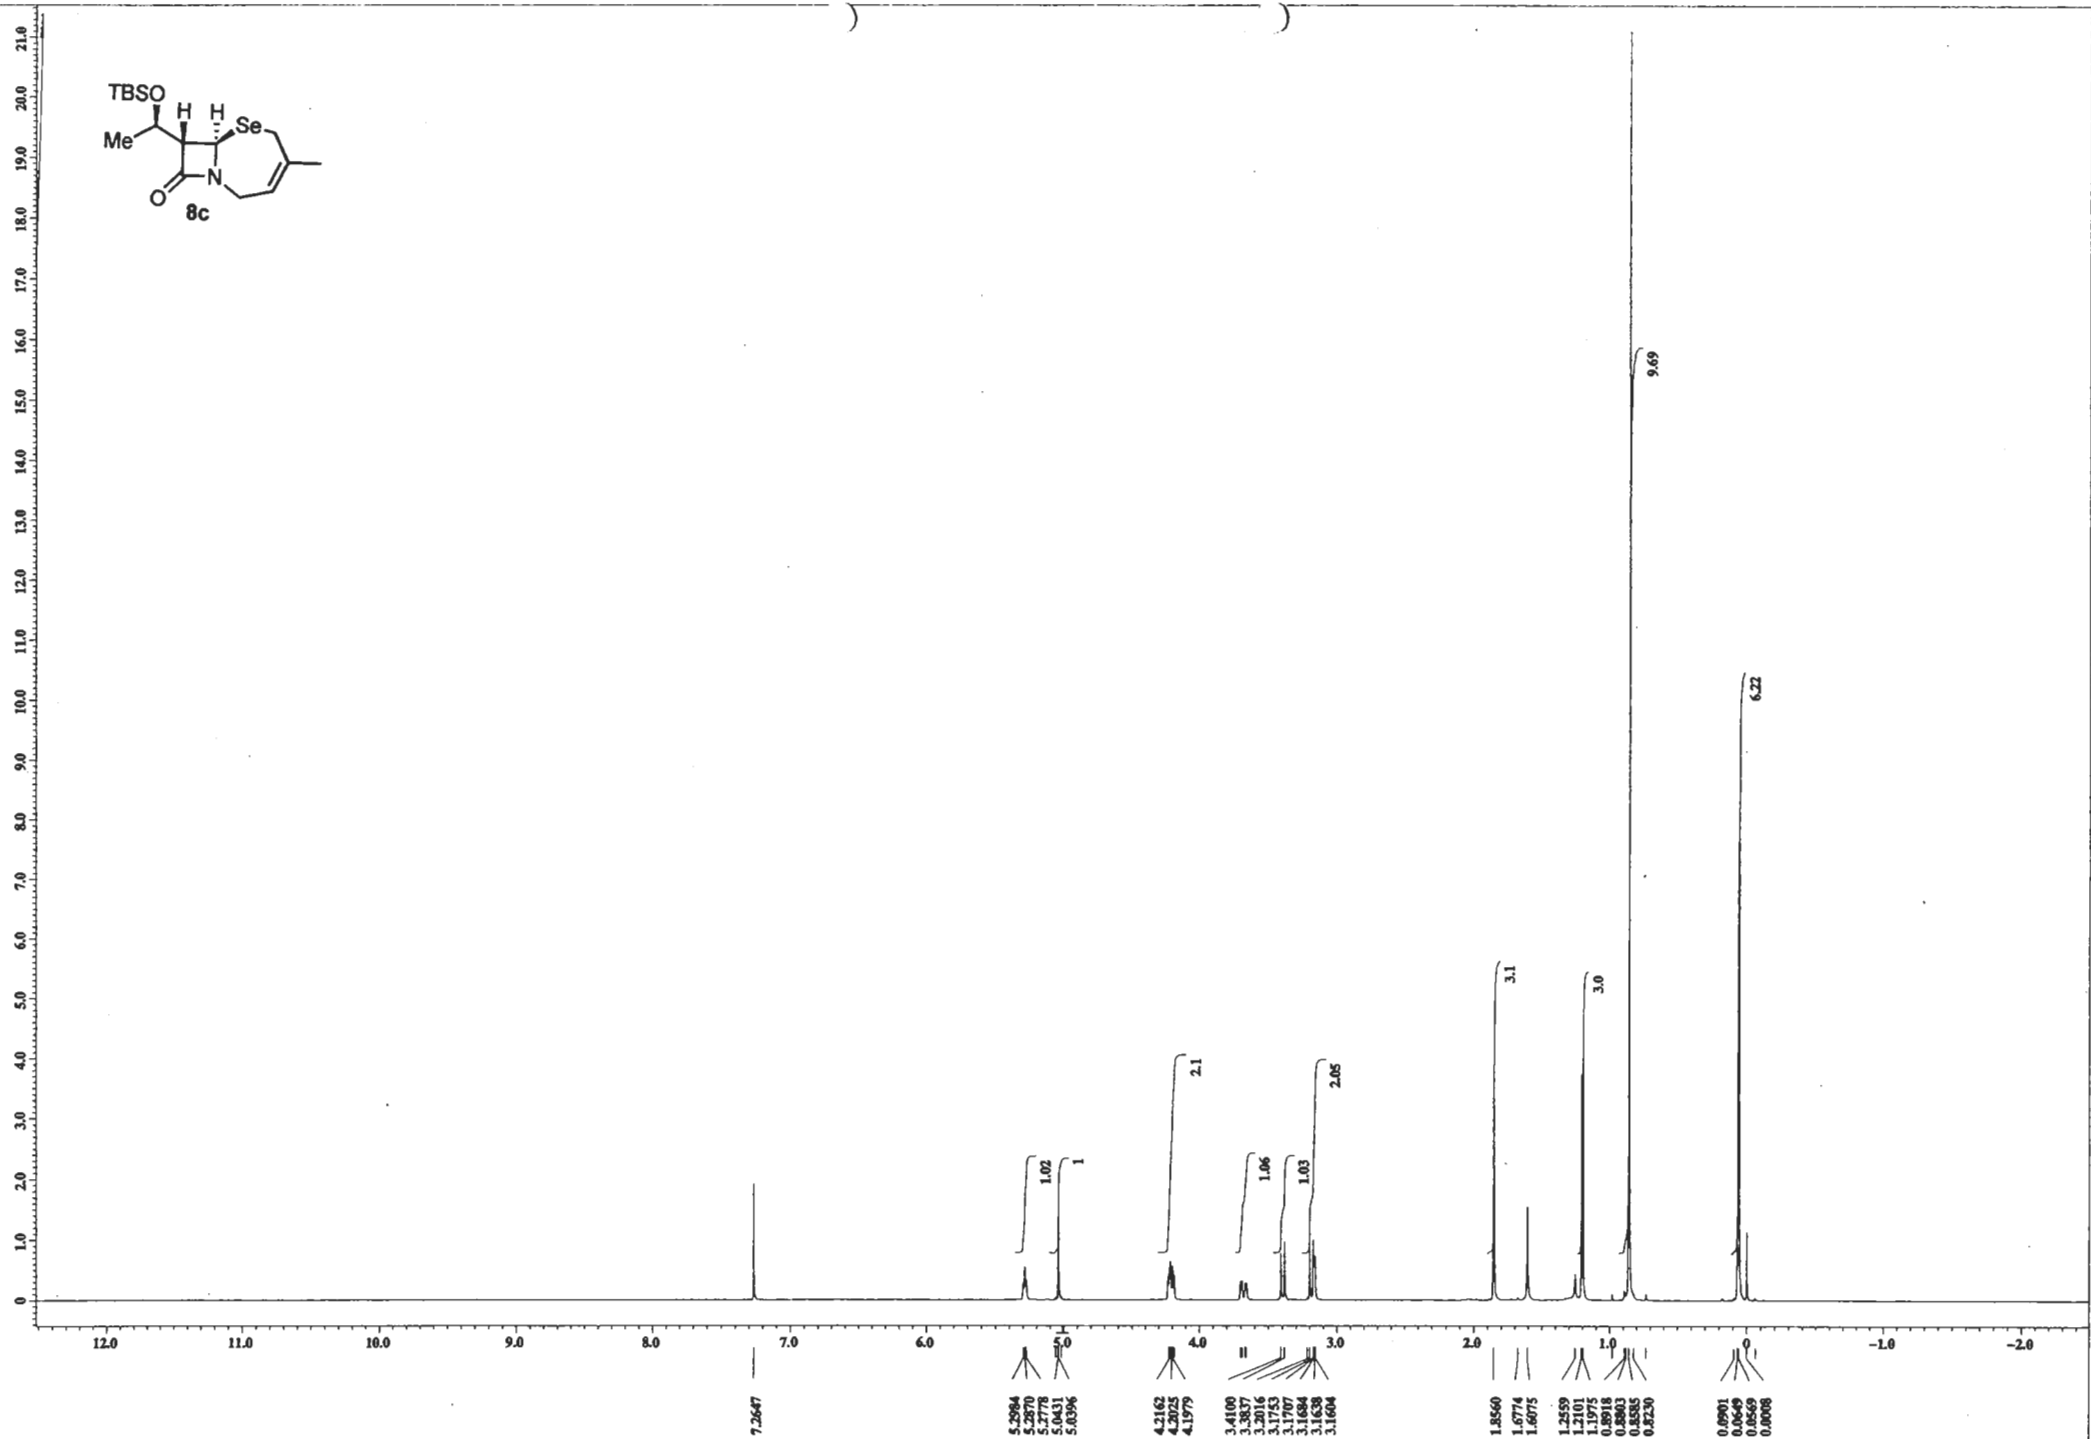

X : parts per Million : 1H





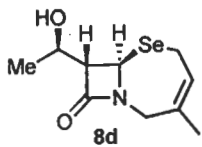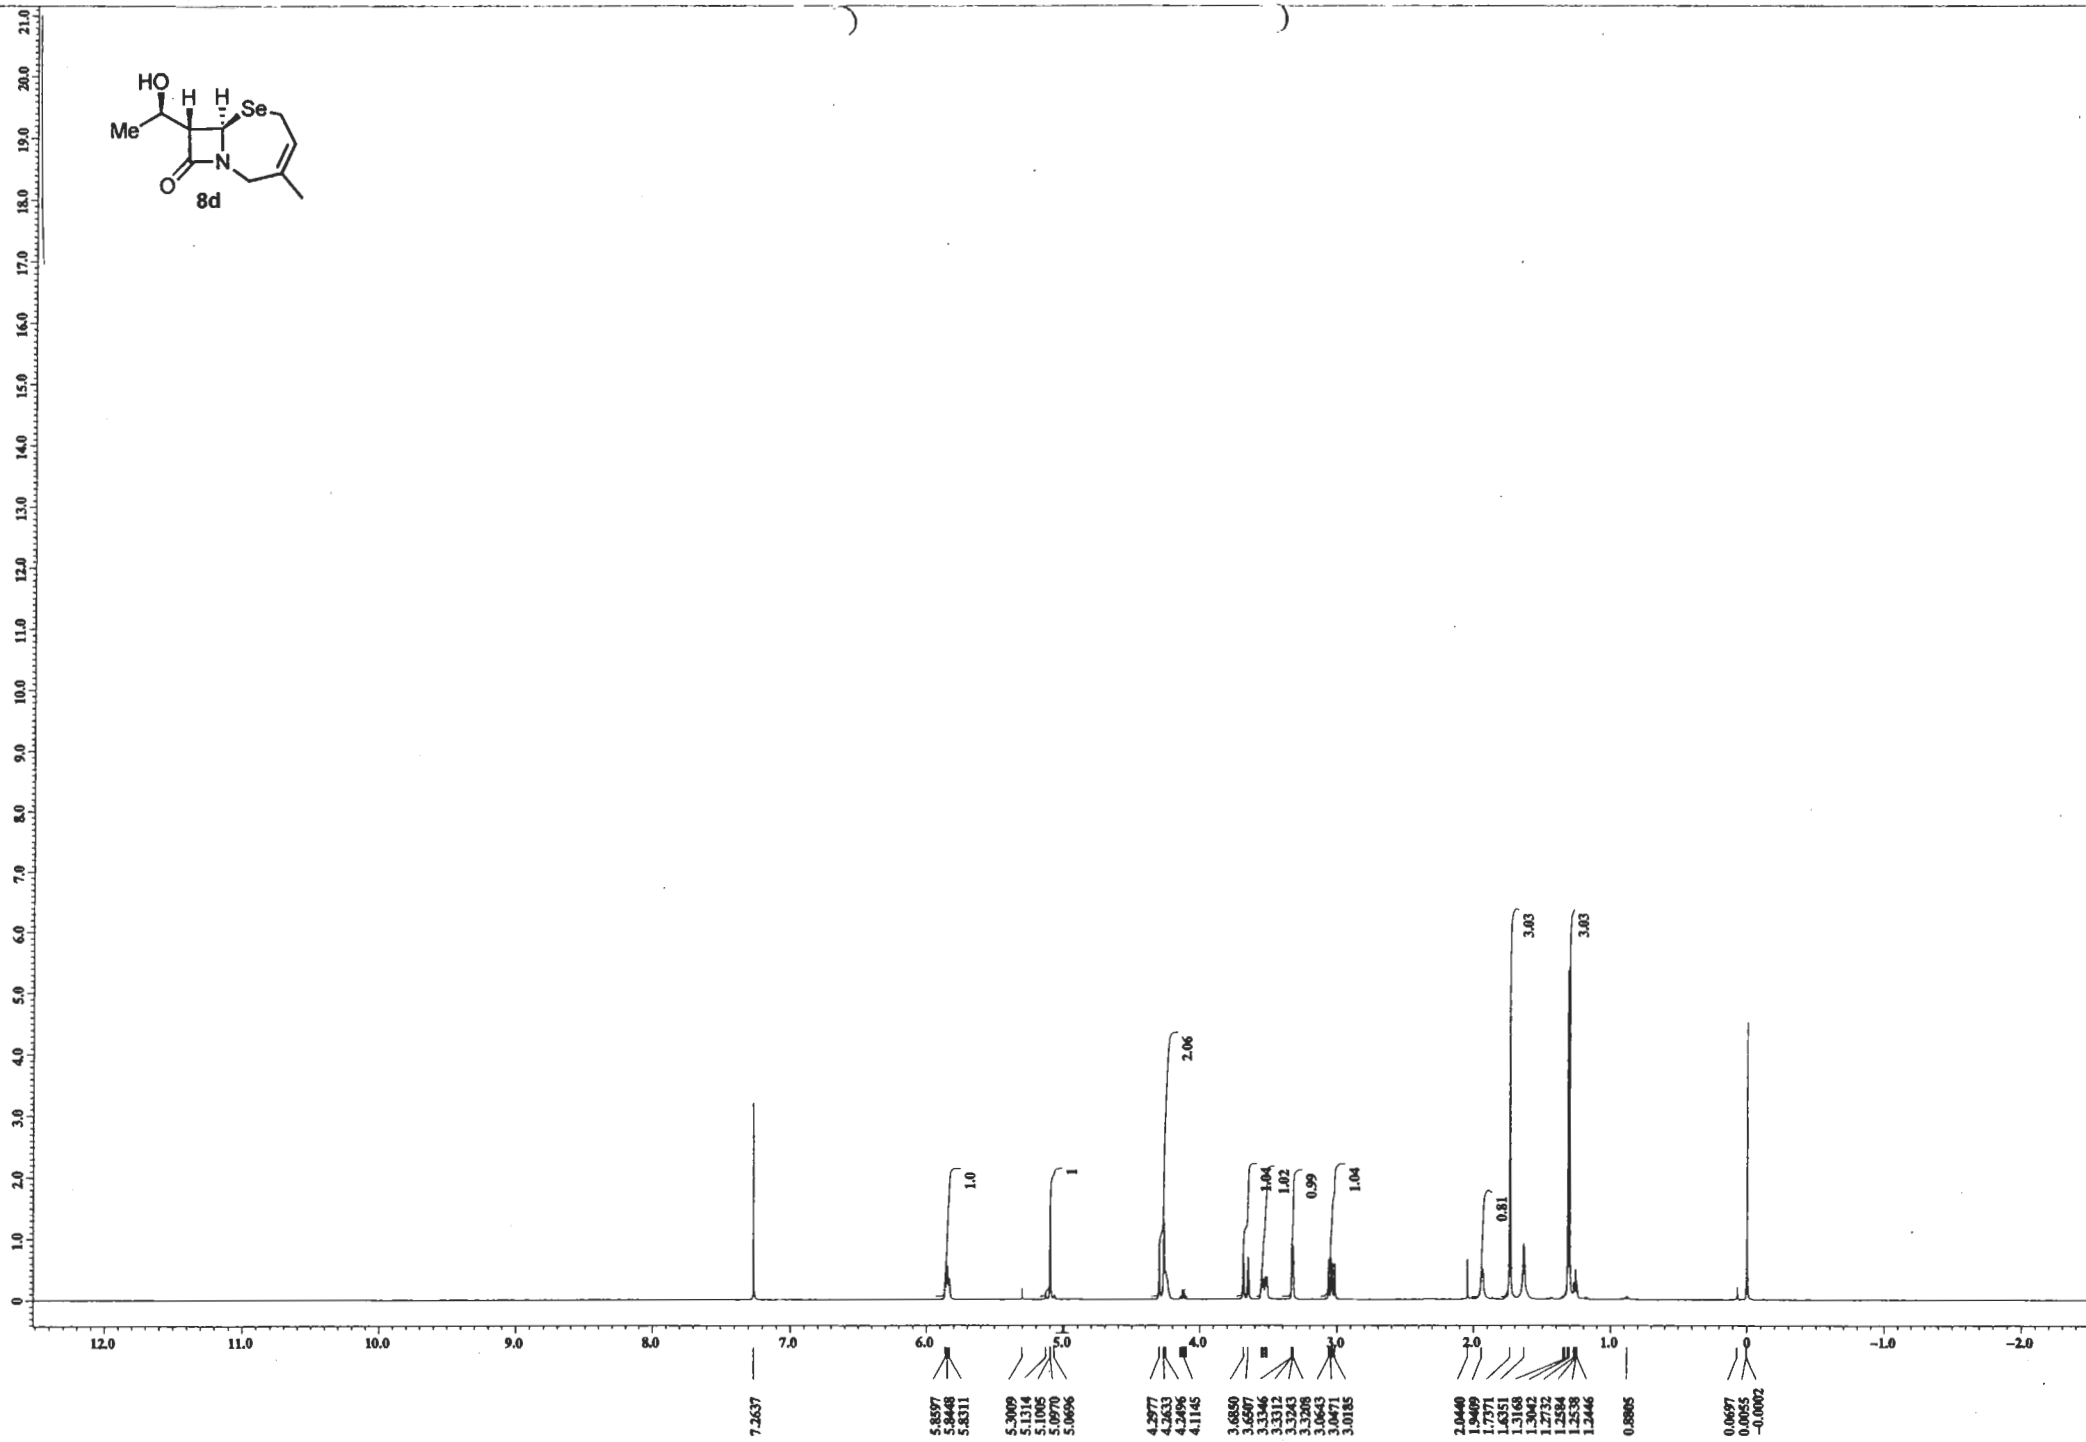

X : parts per Million : 1H

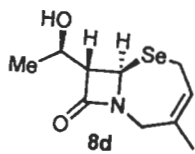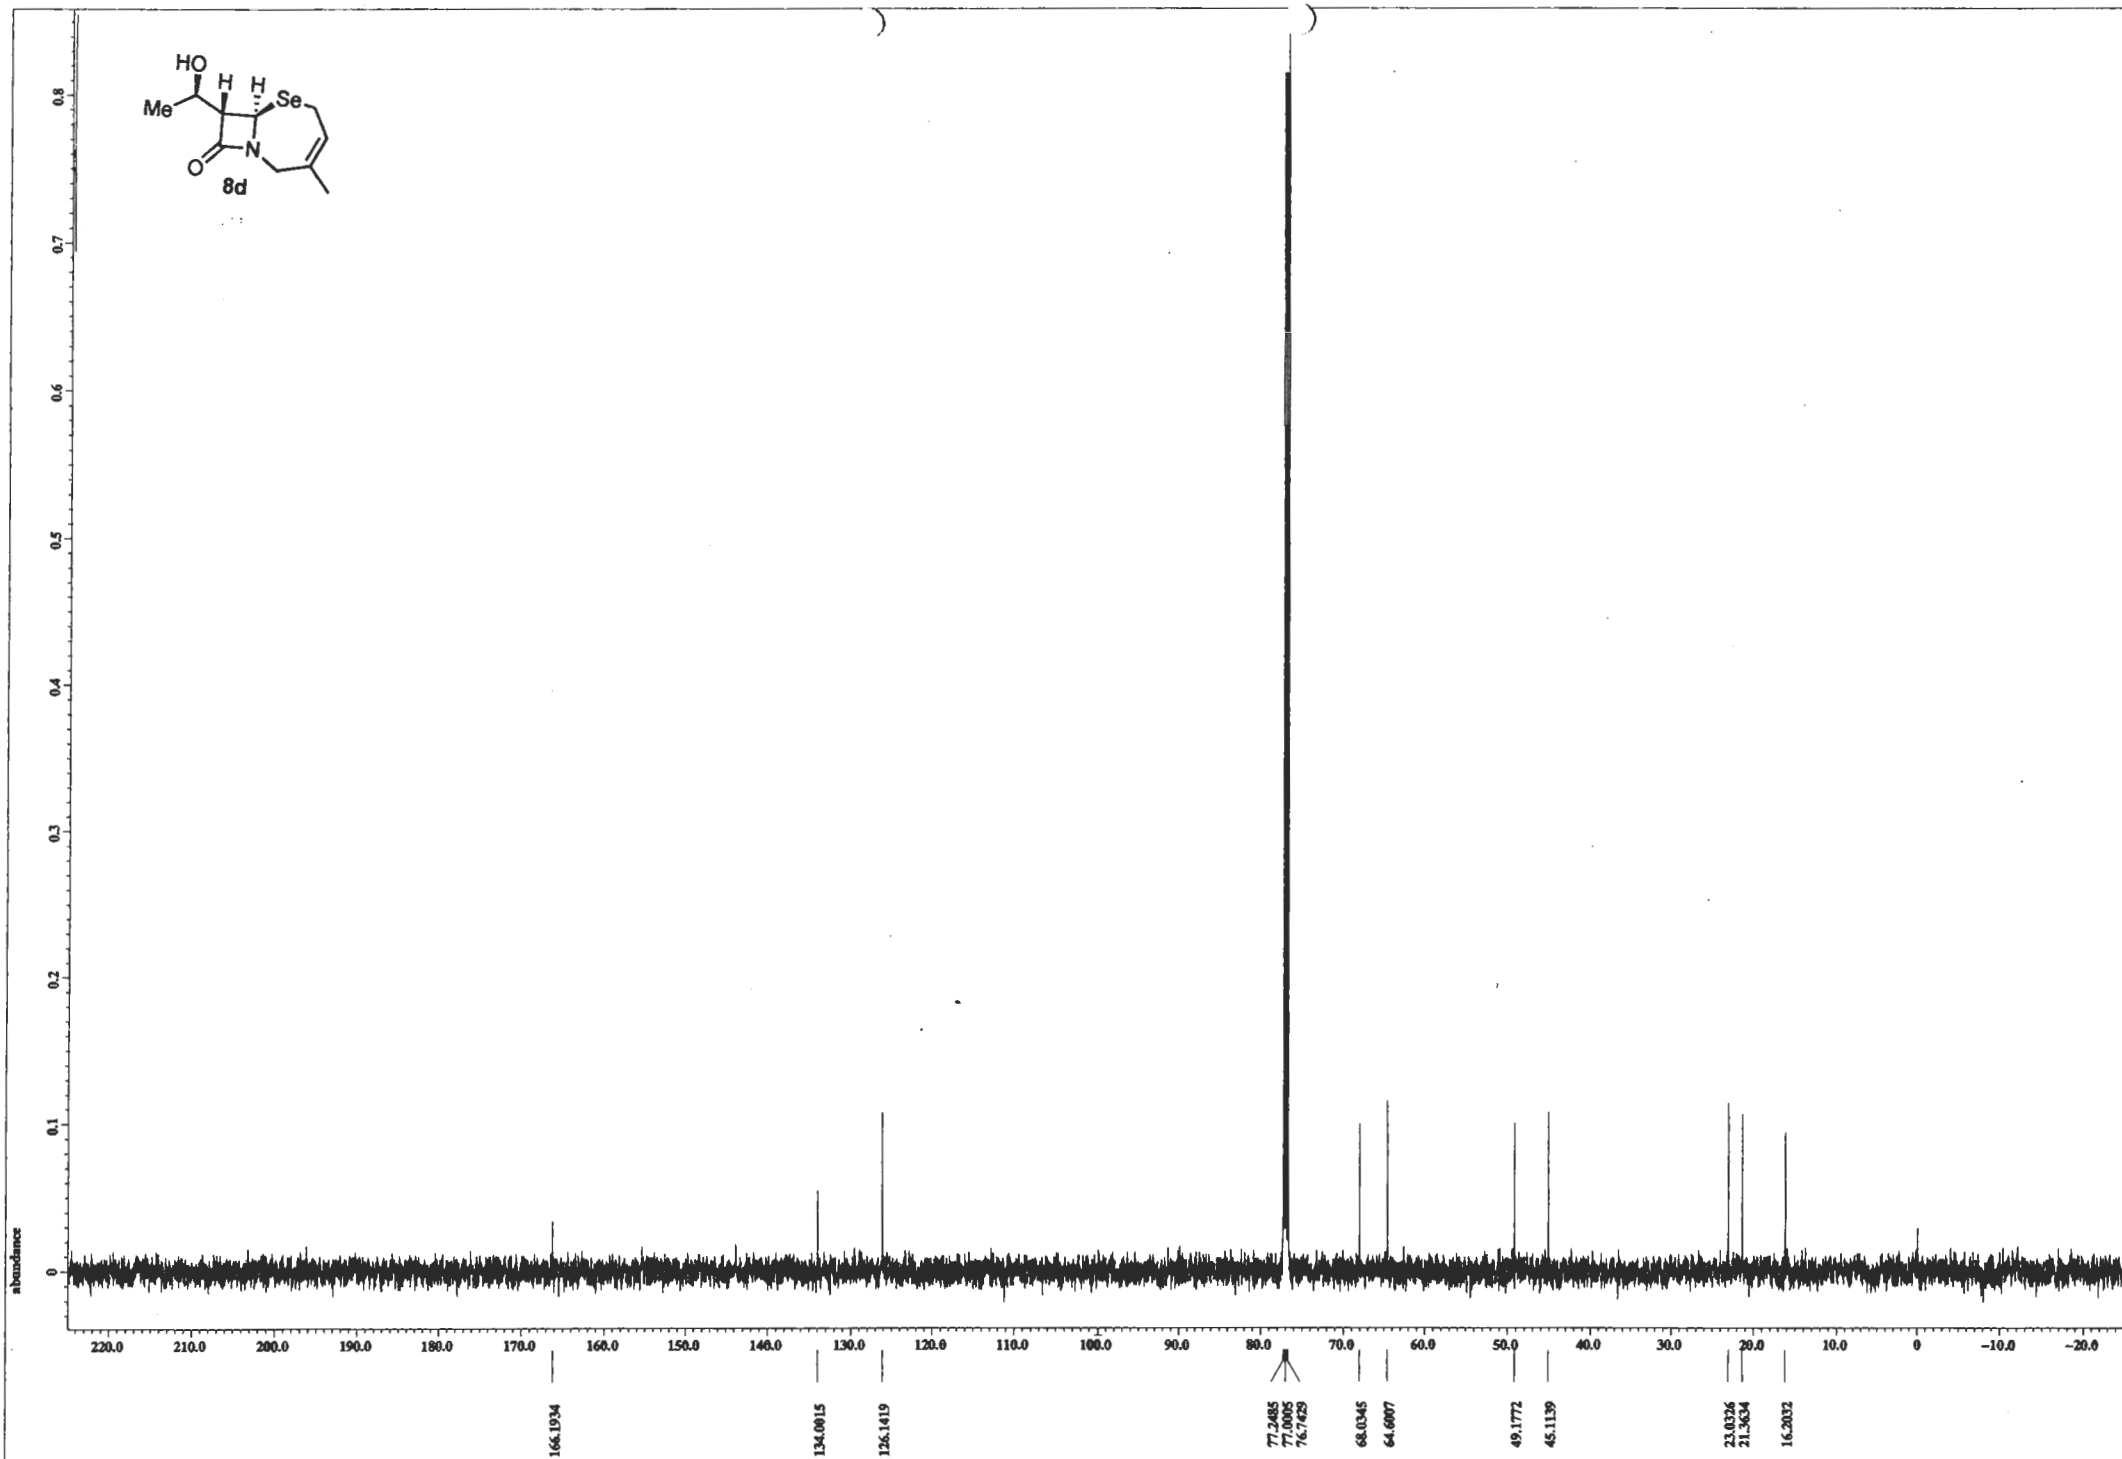

X : parts per Million :  $^{13}\text{C}$

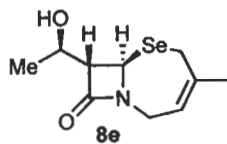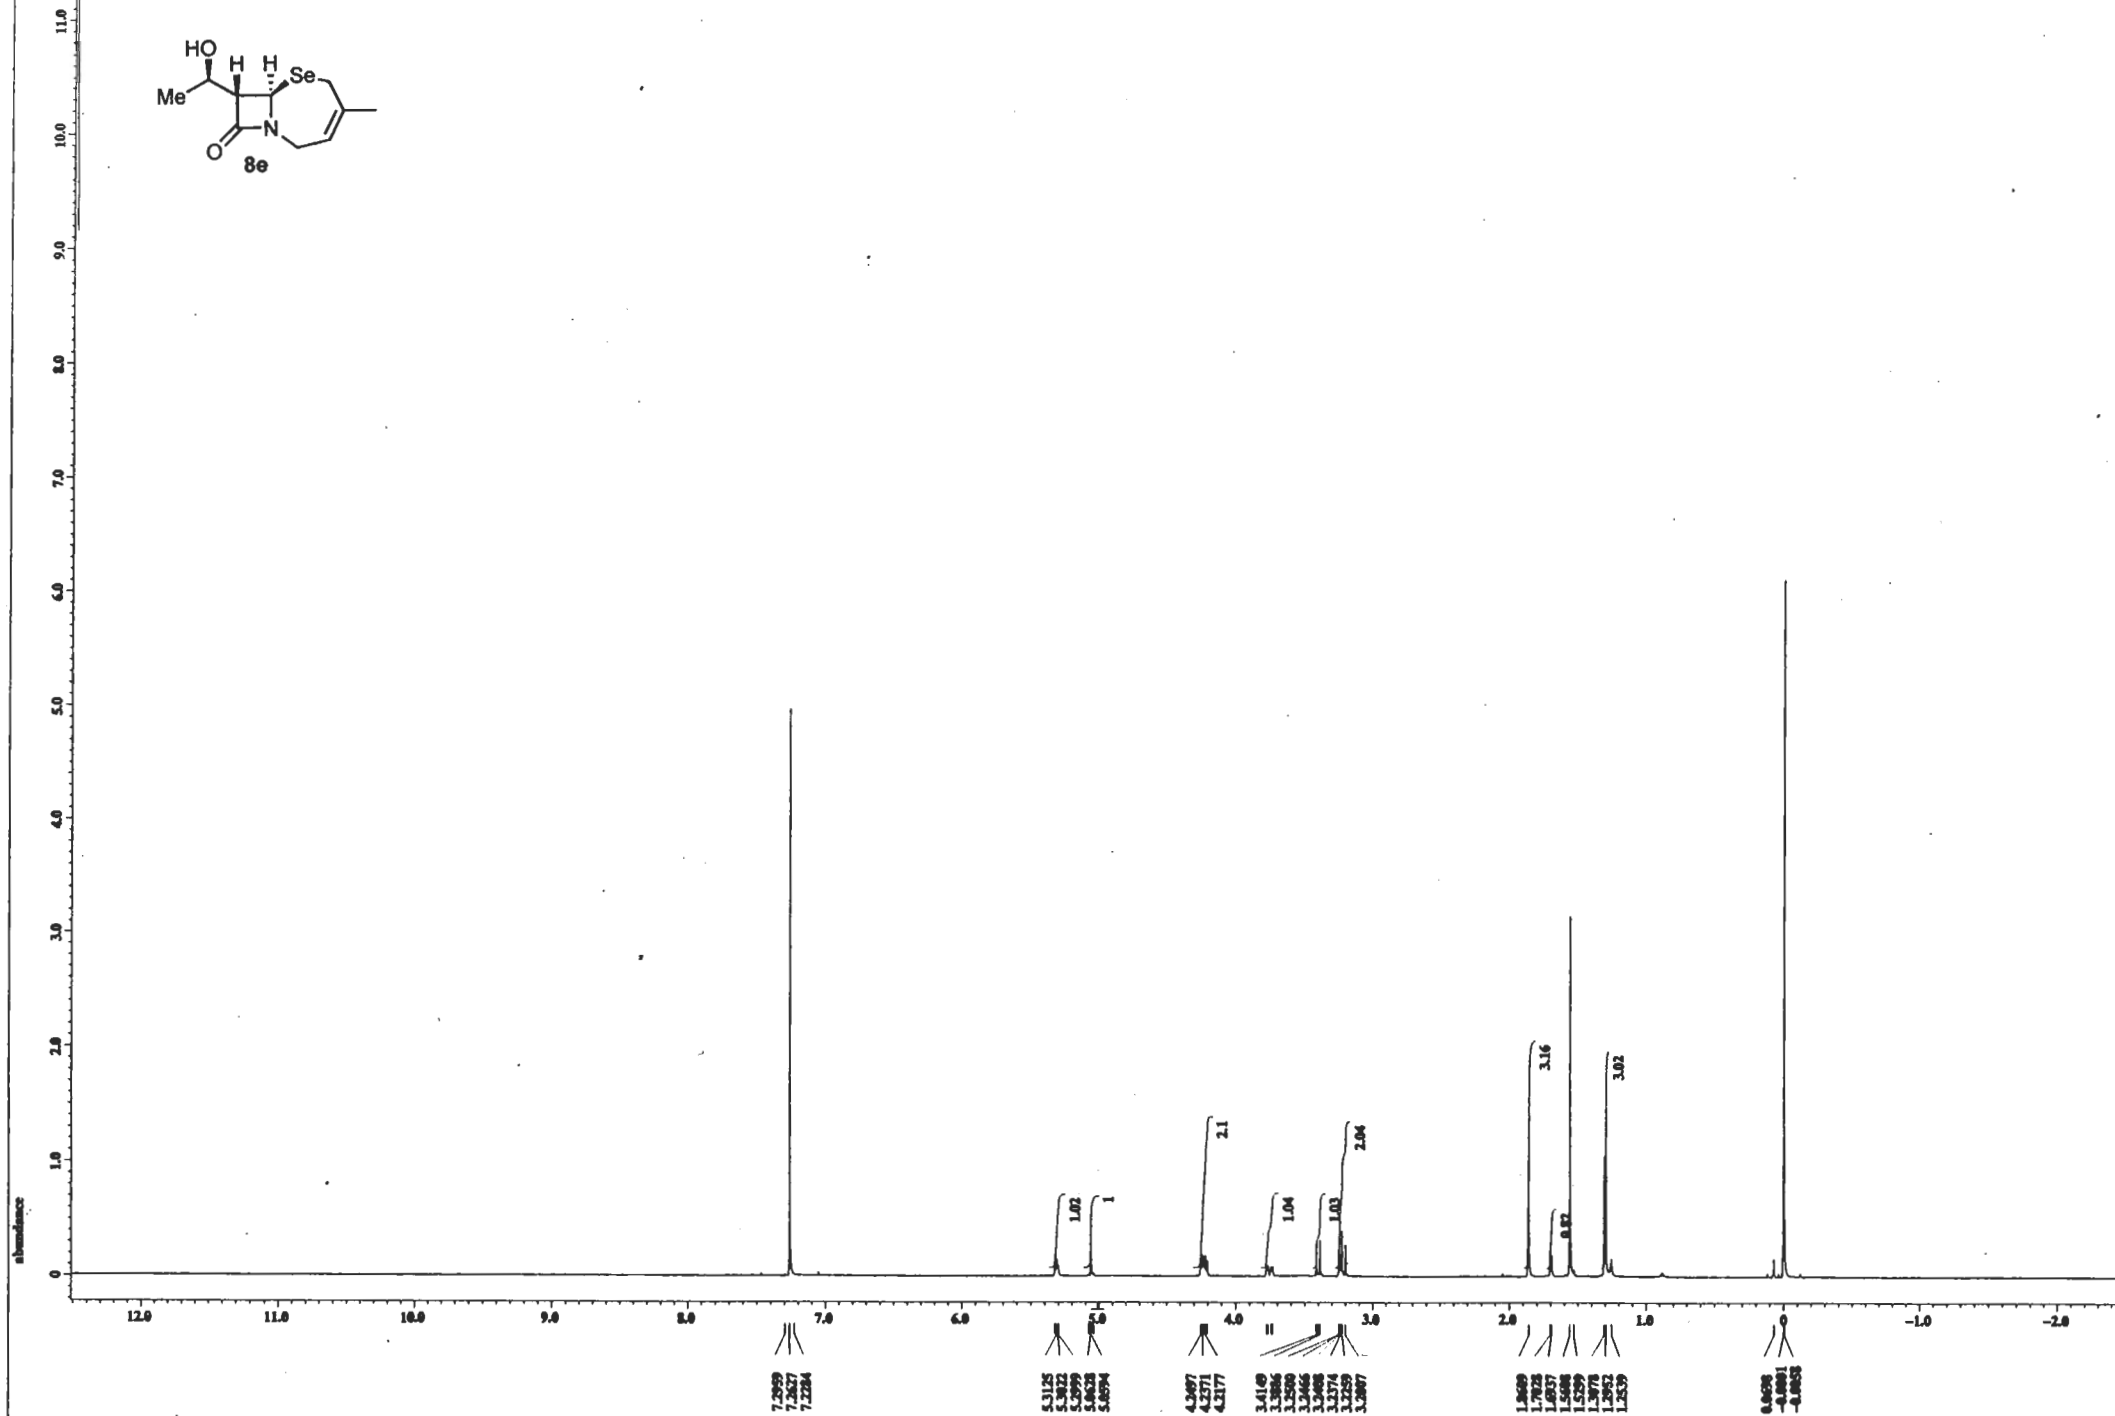

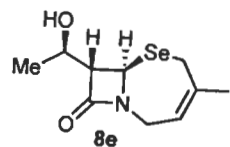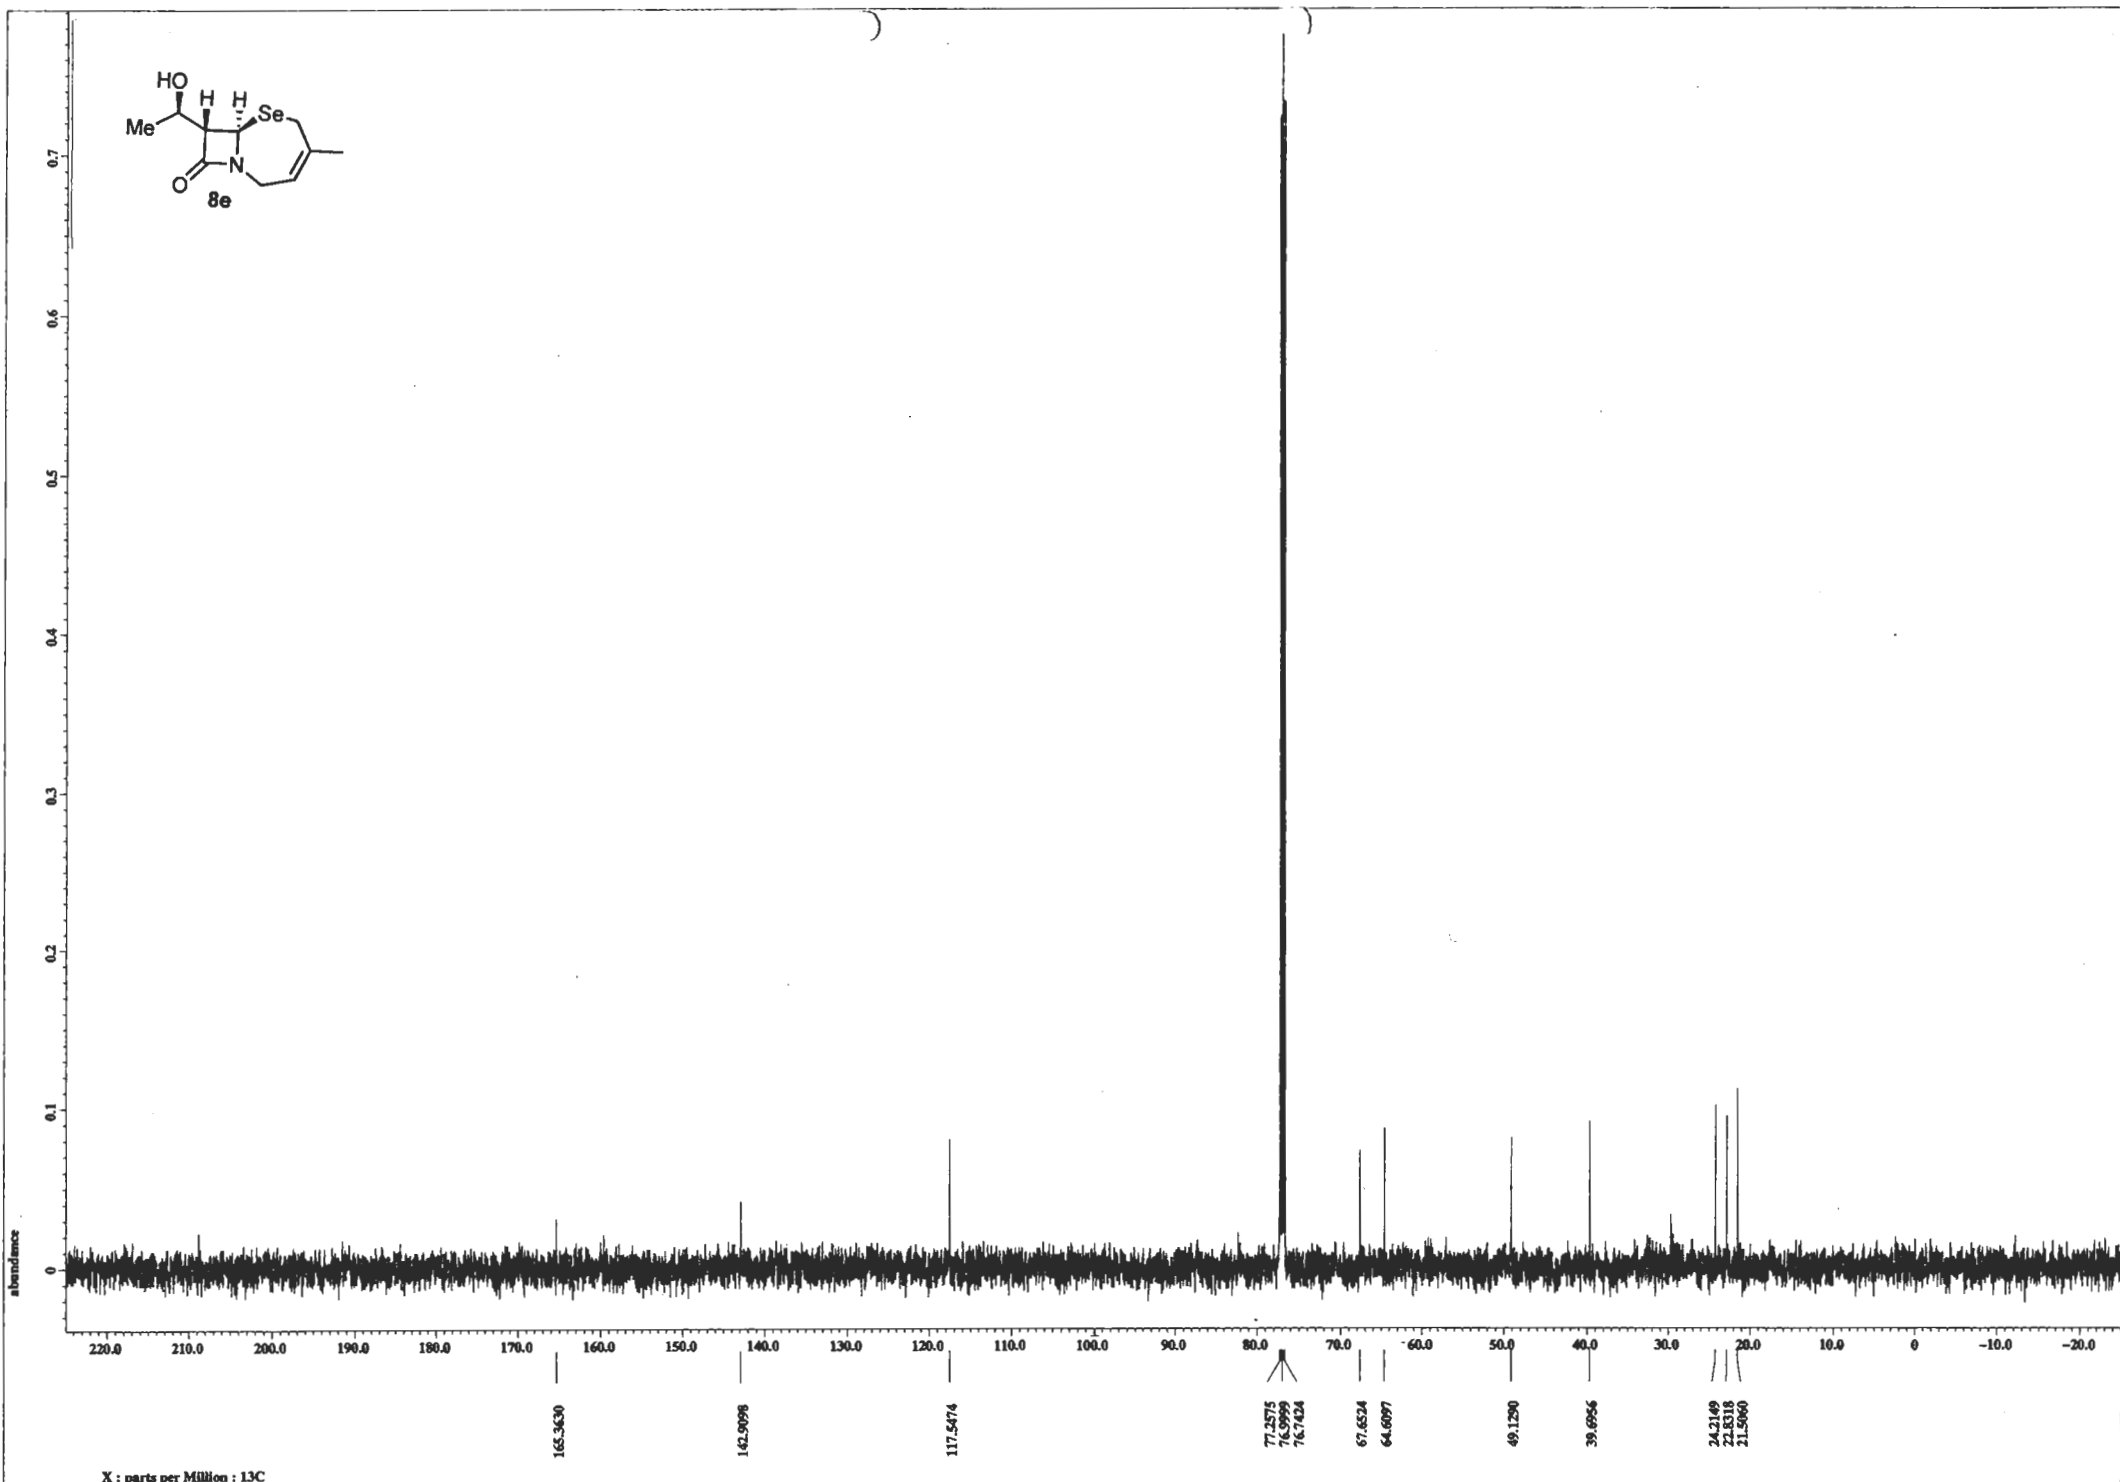

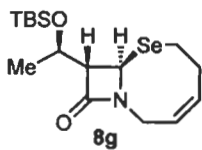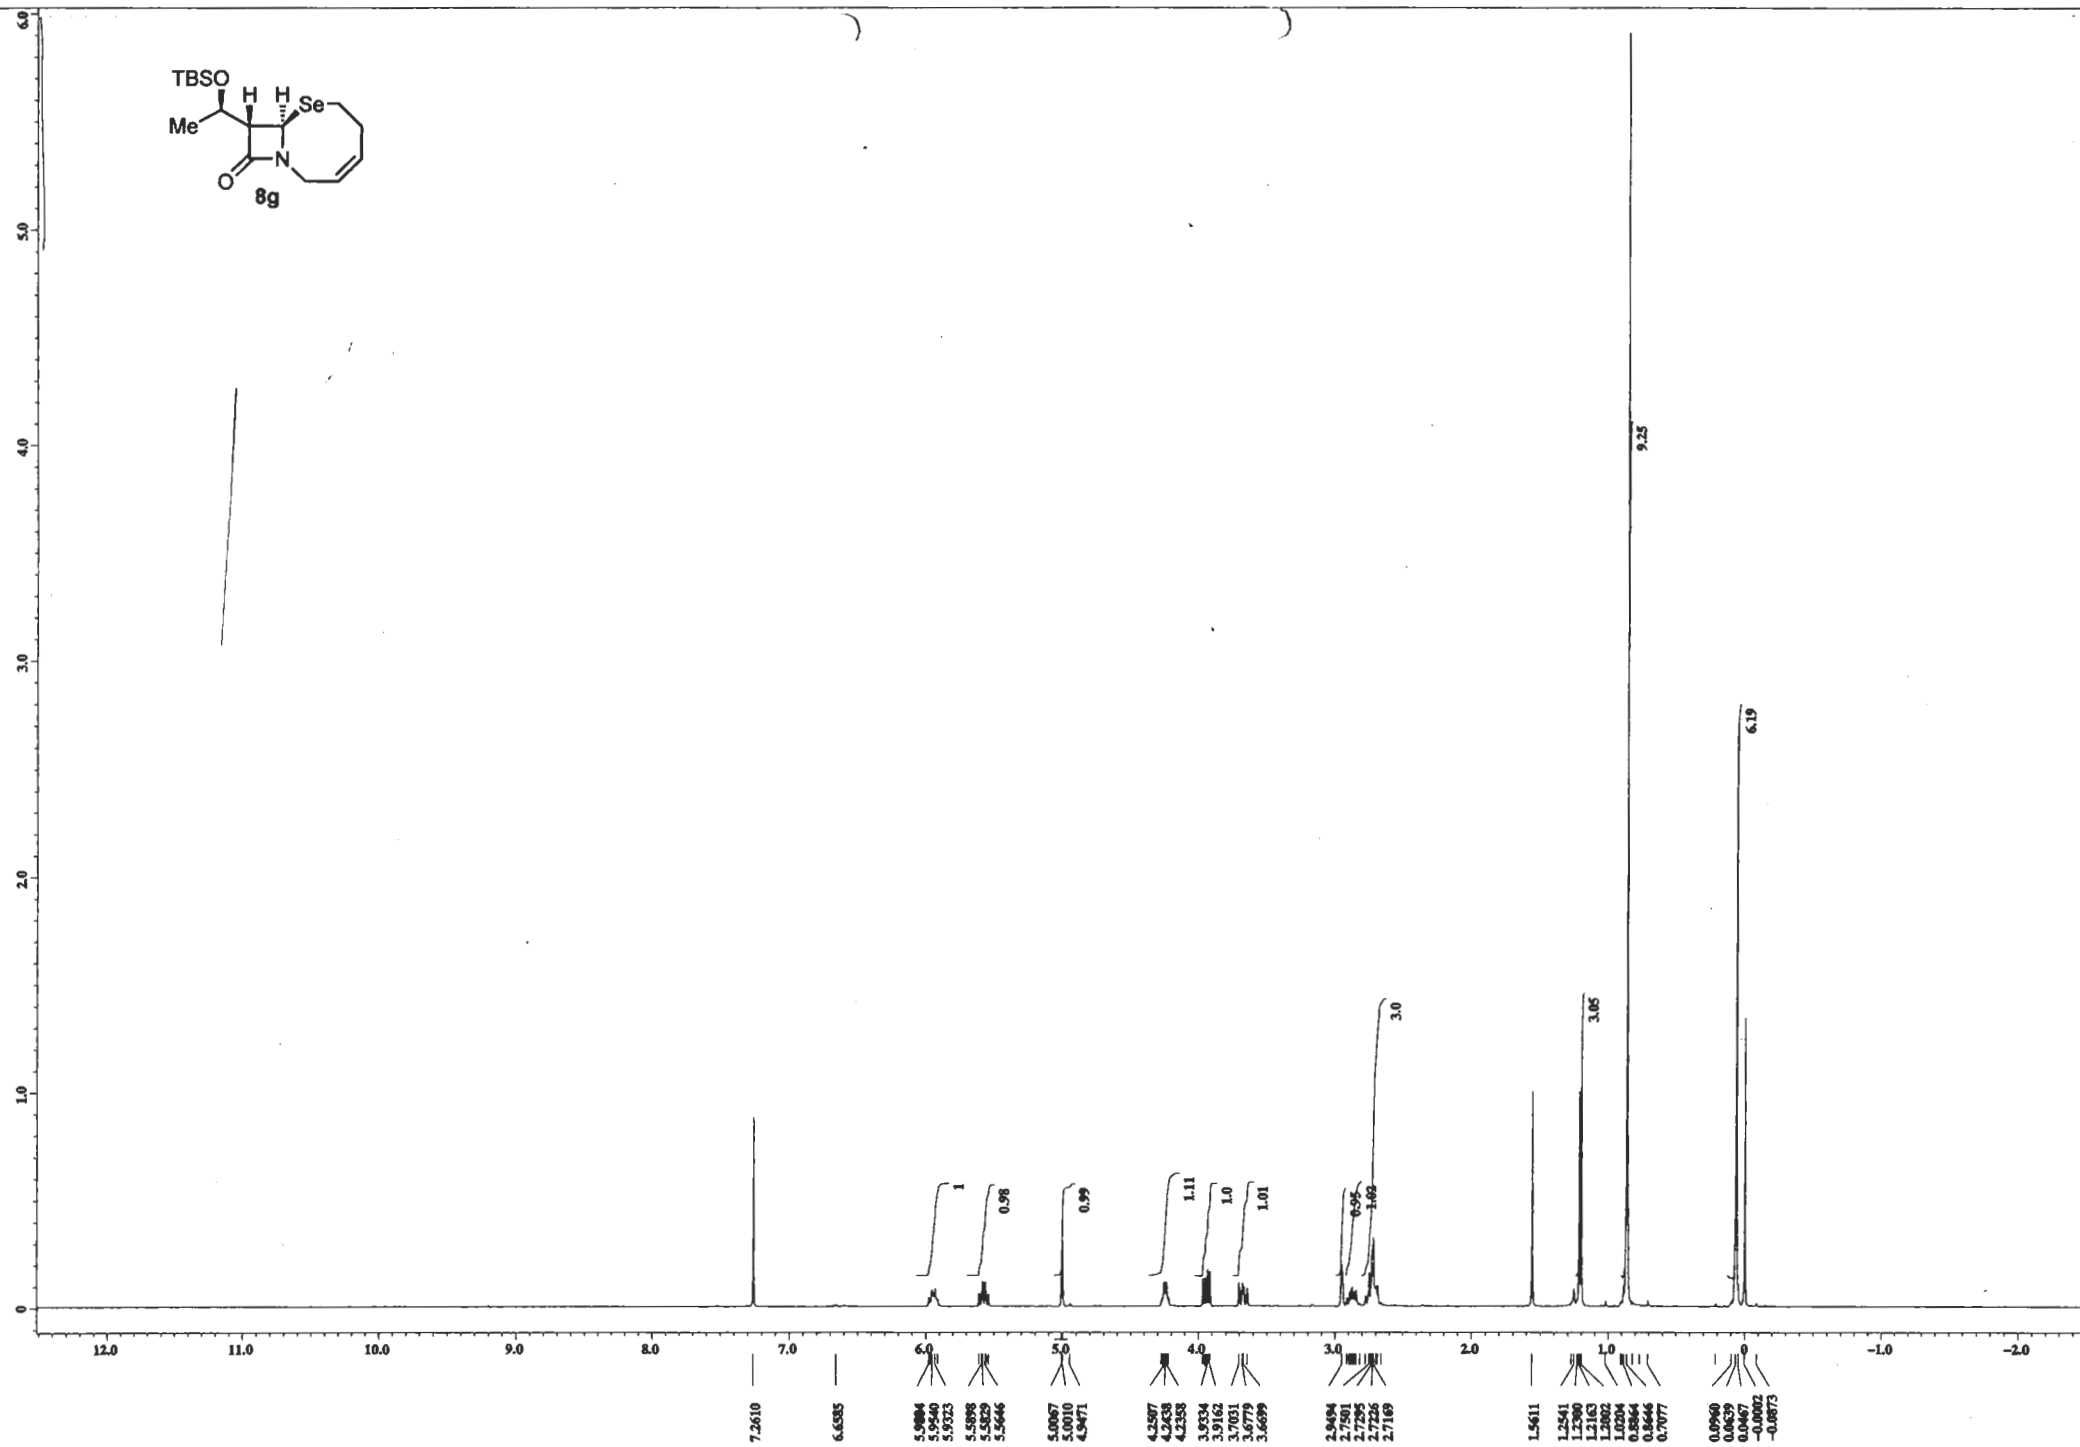

X : parts per Million : 1H

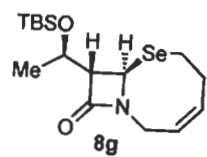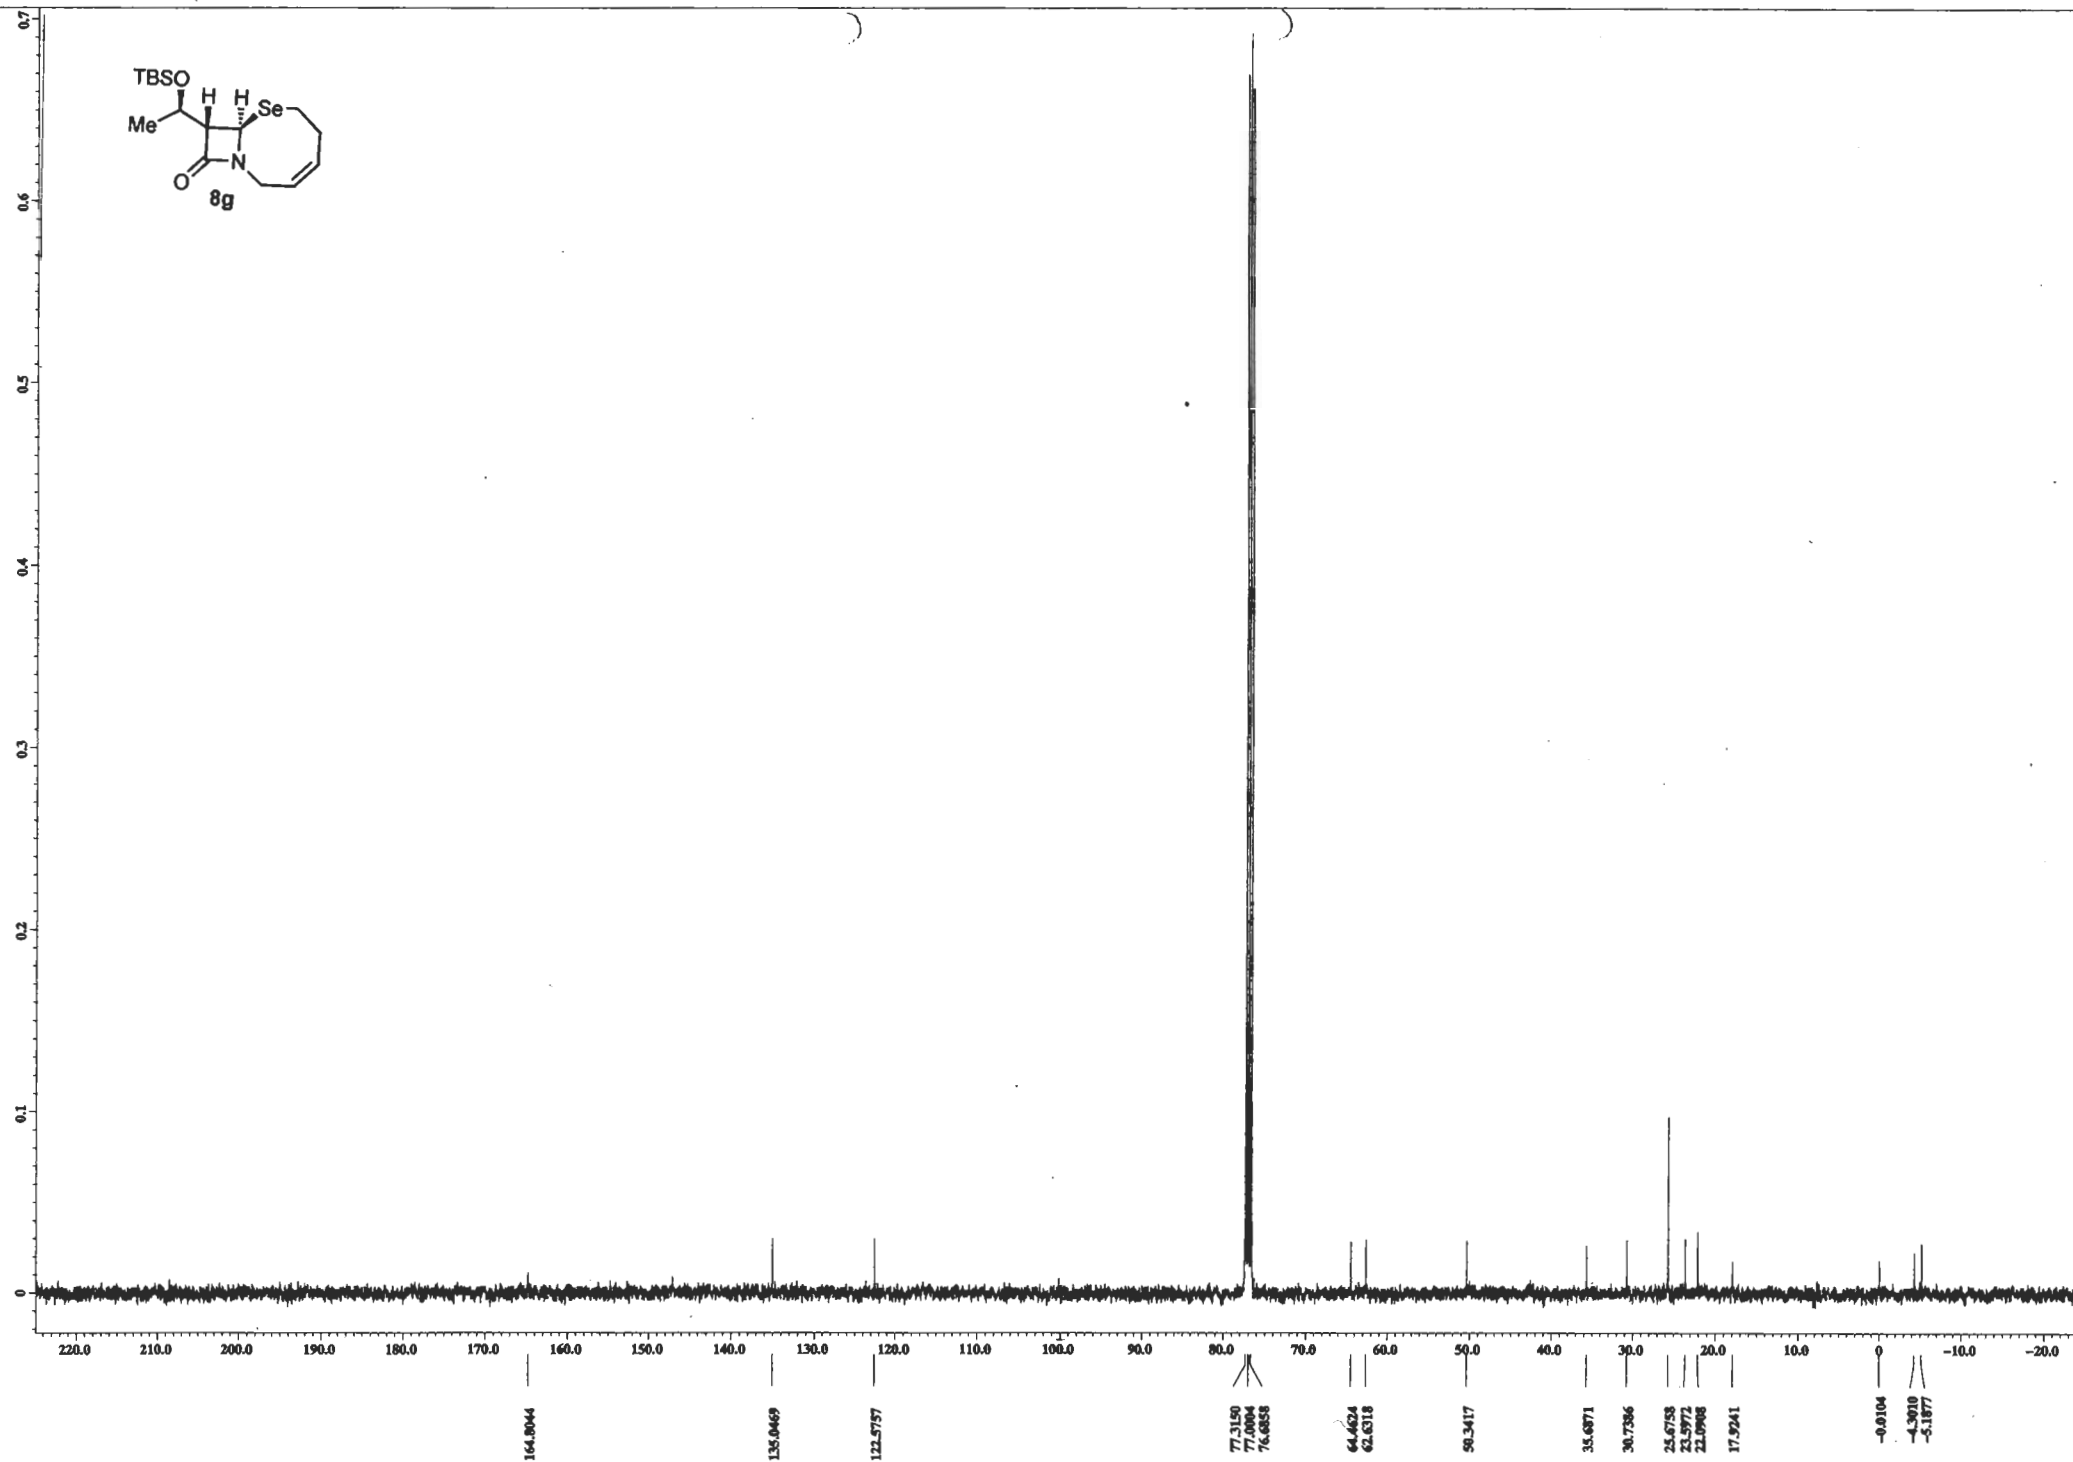

X : parts per Million : 13C

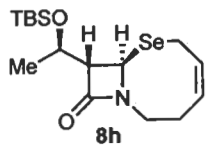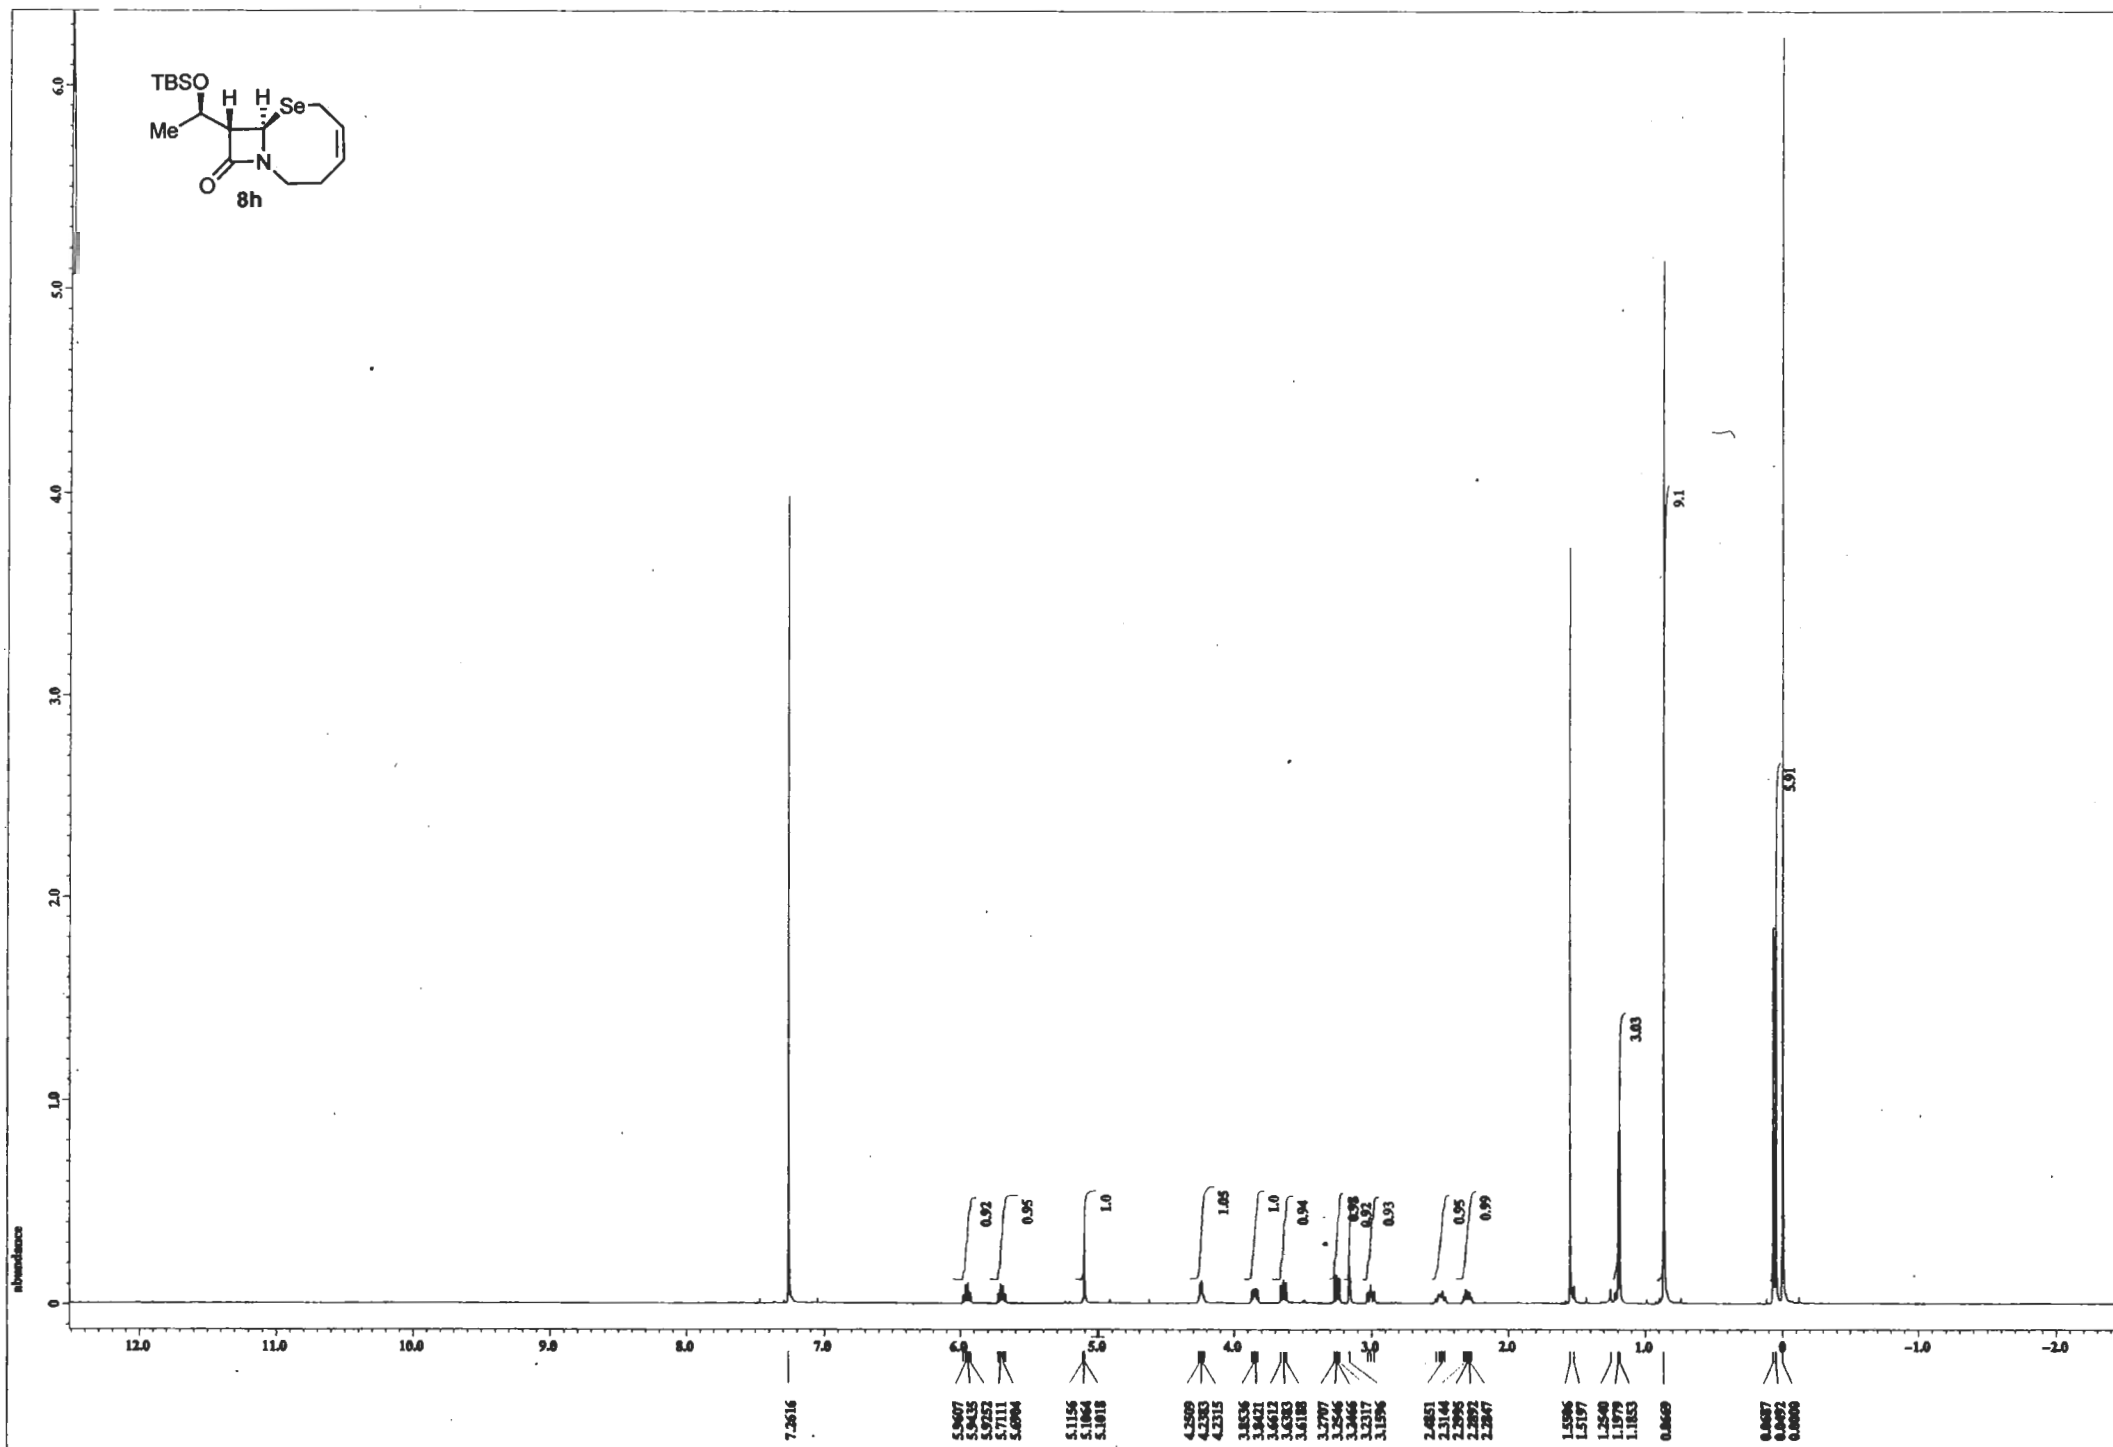

X : parts per Million : 1H



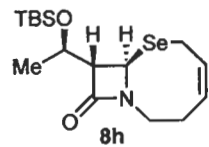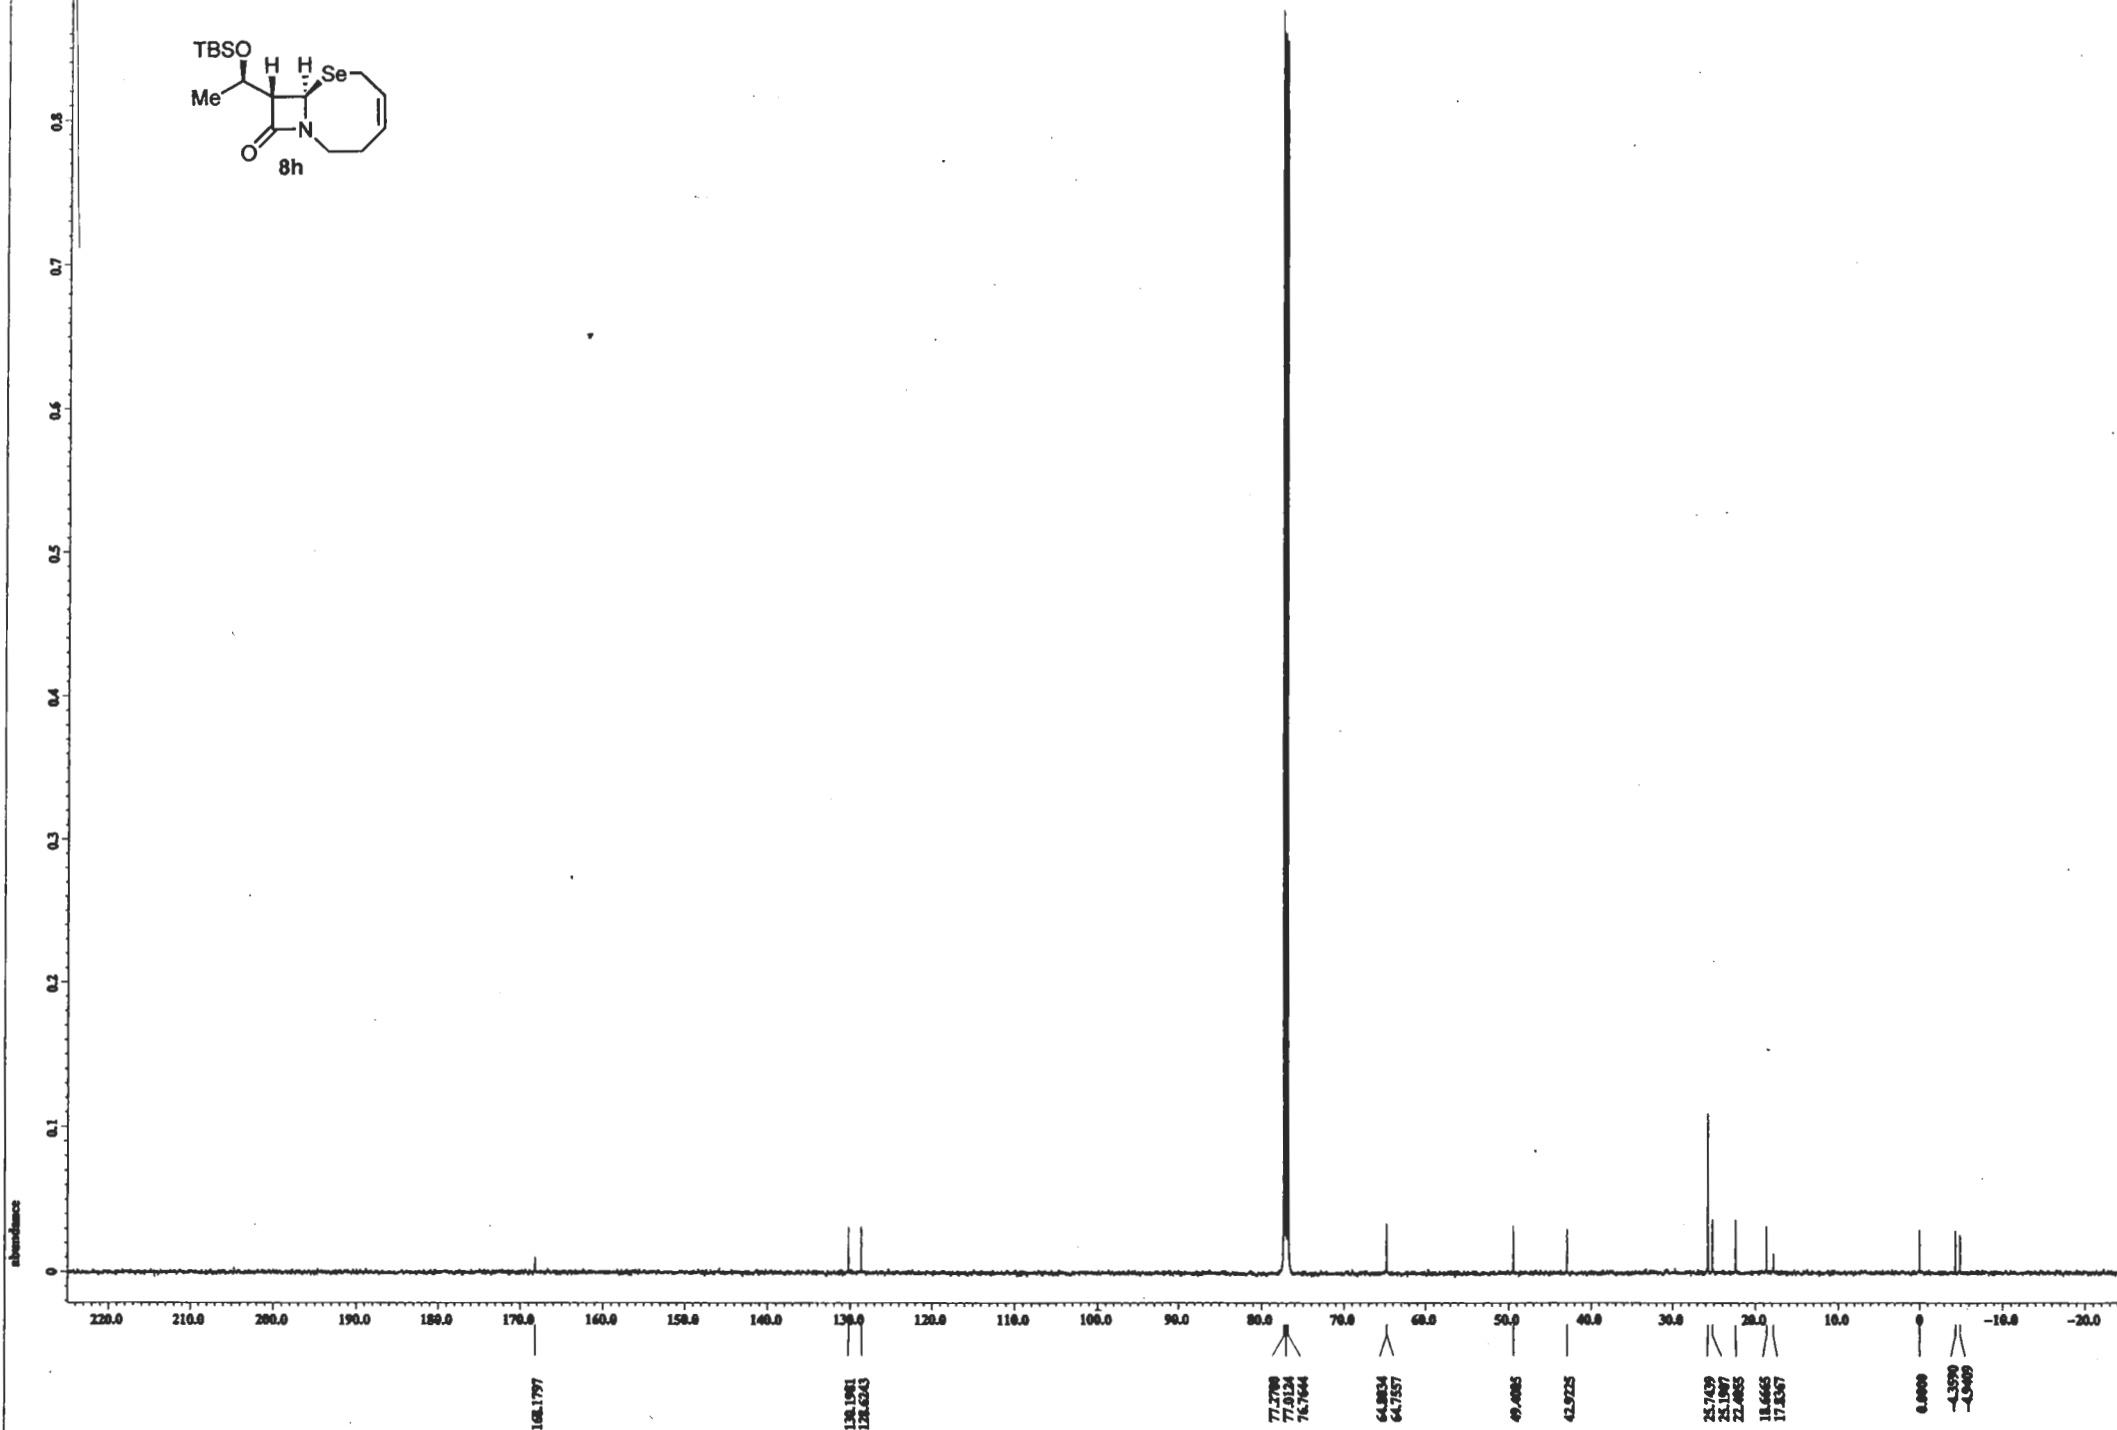

X : parts per Million : 13C

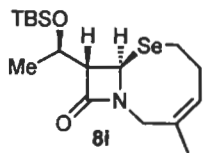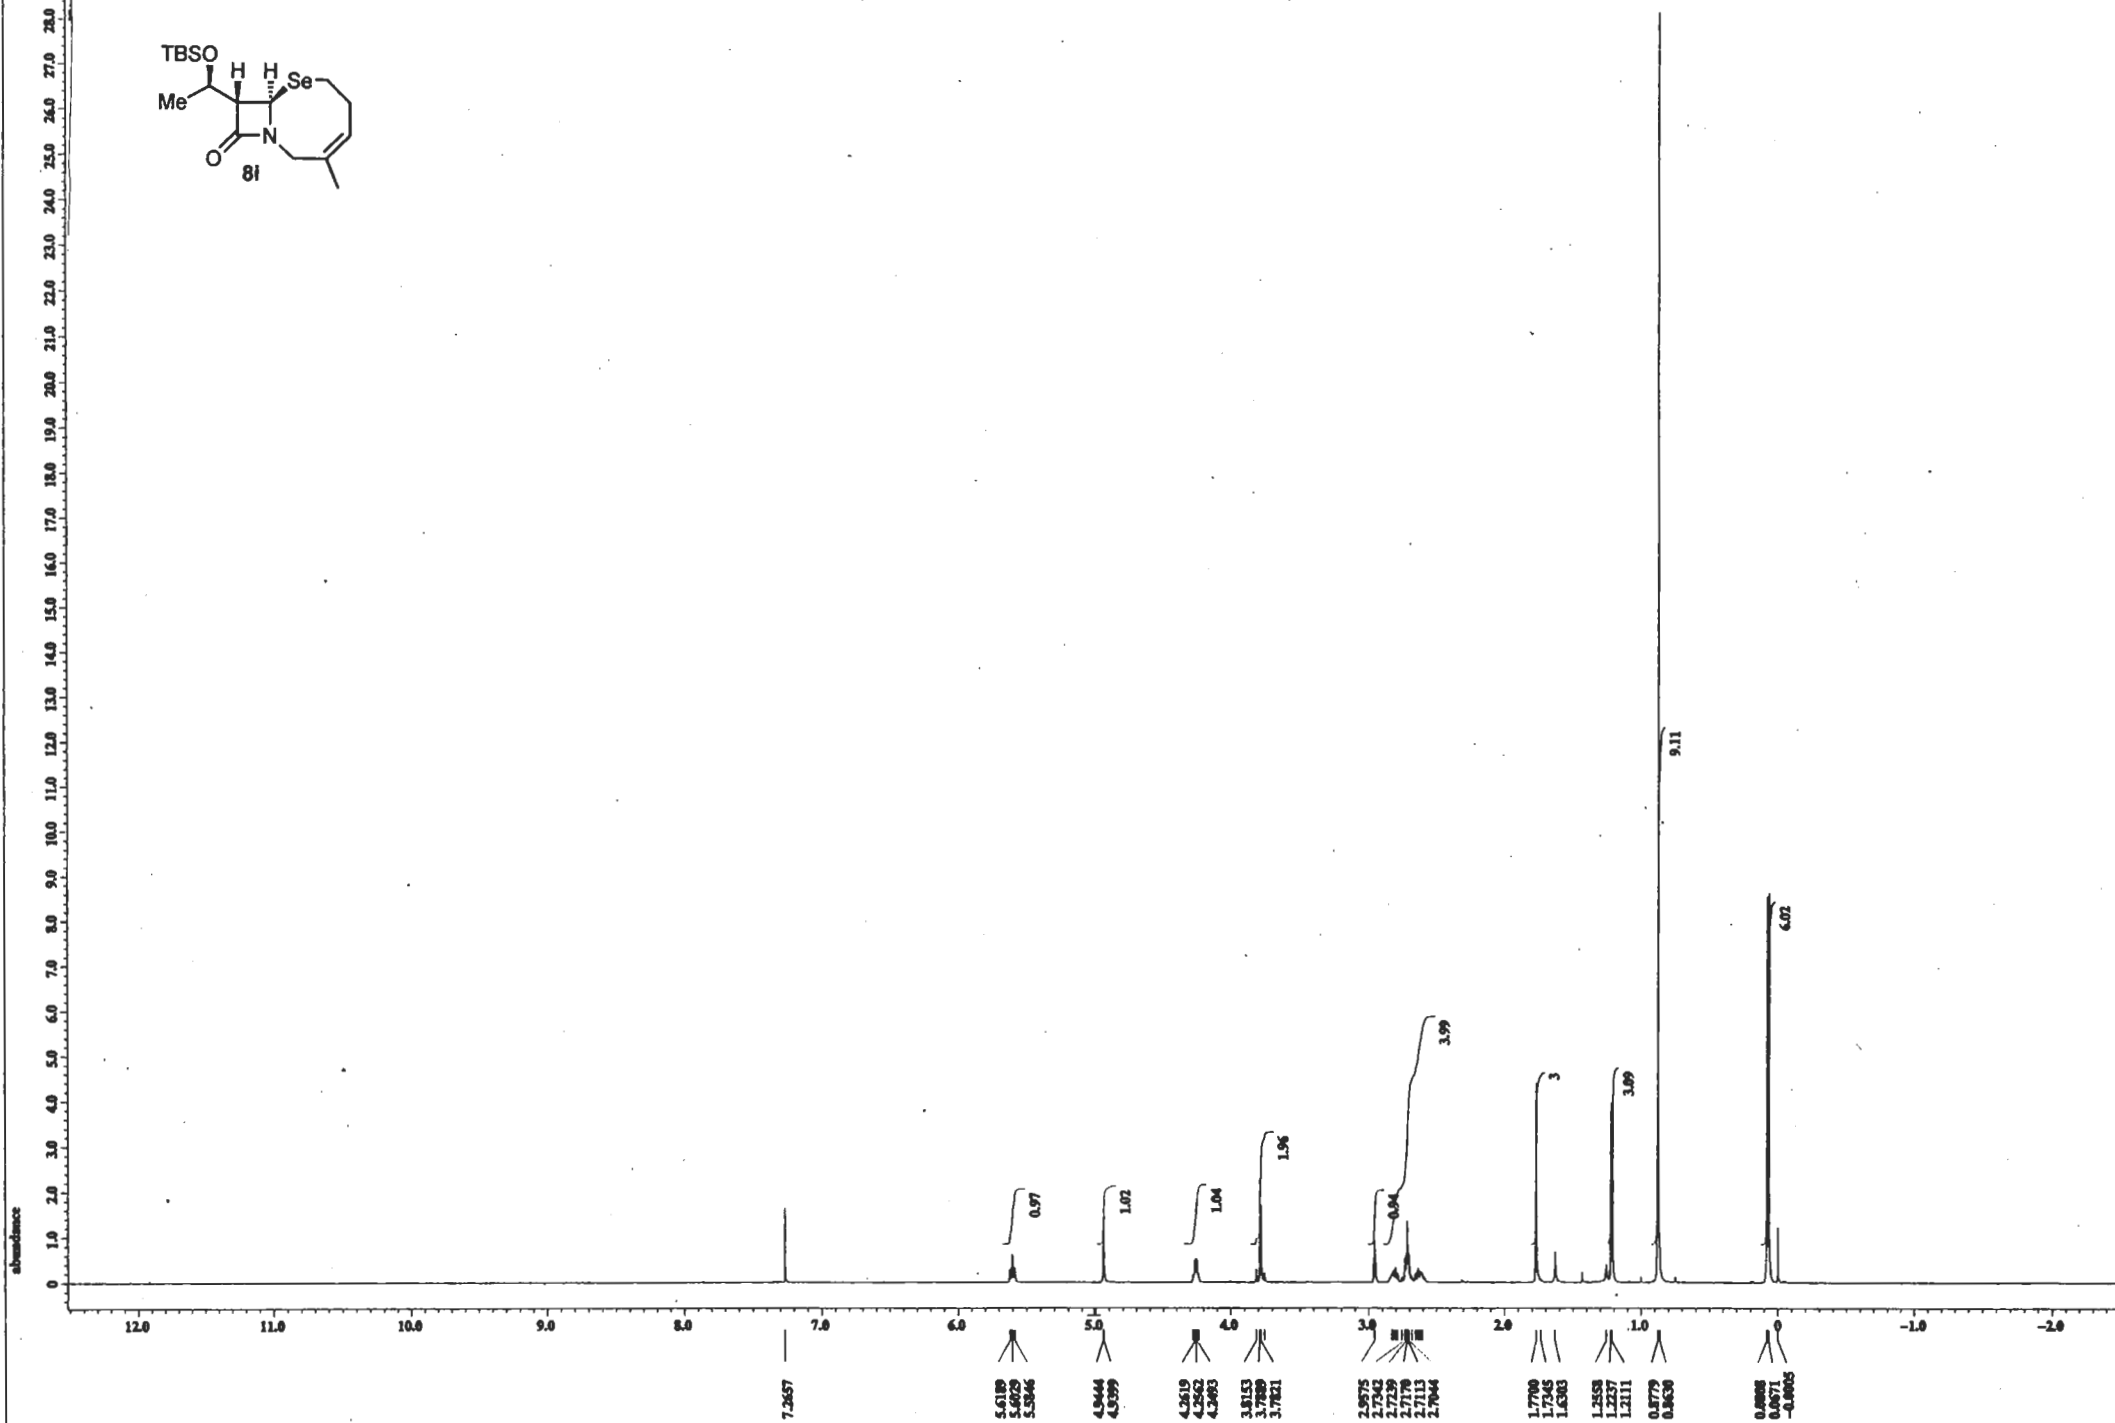

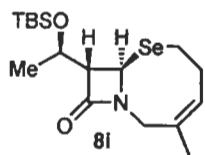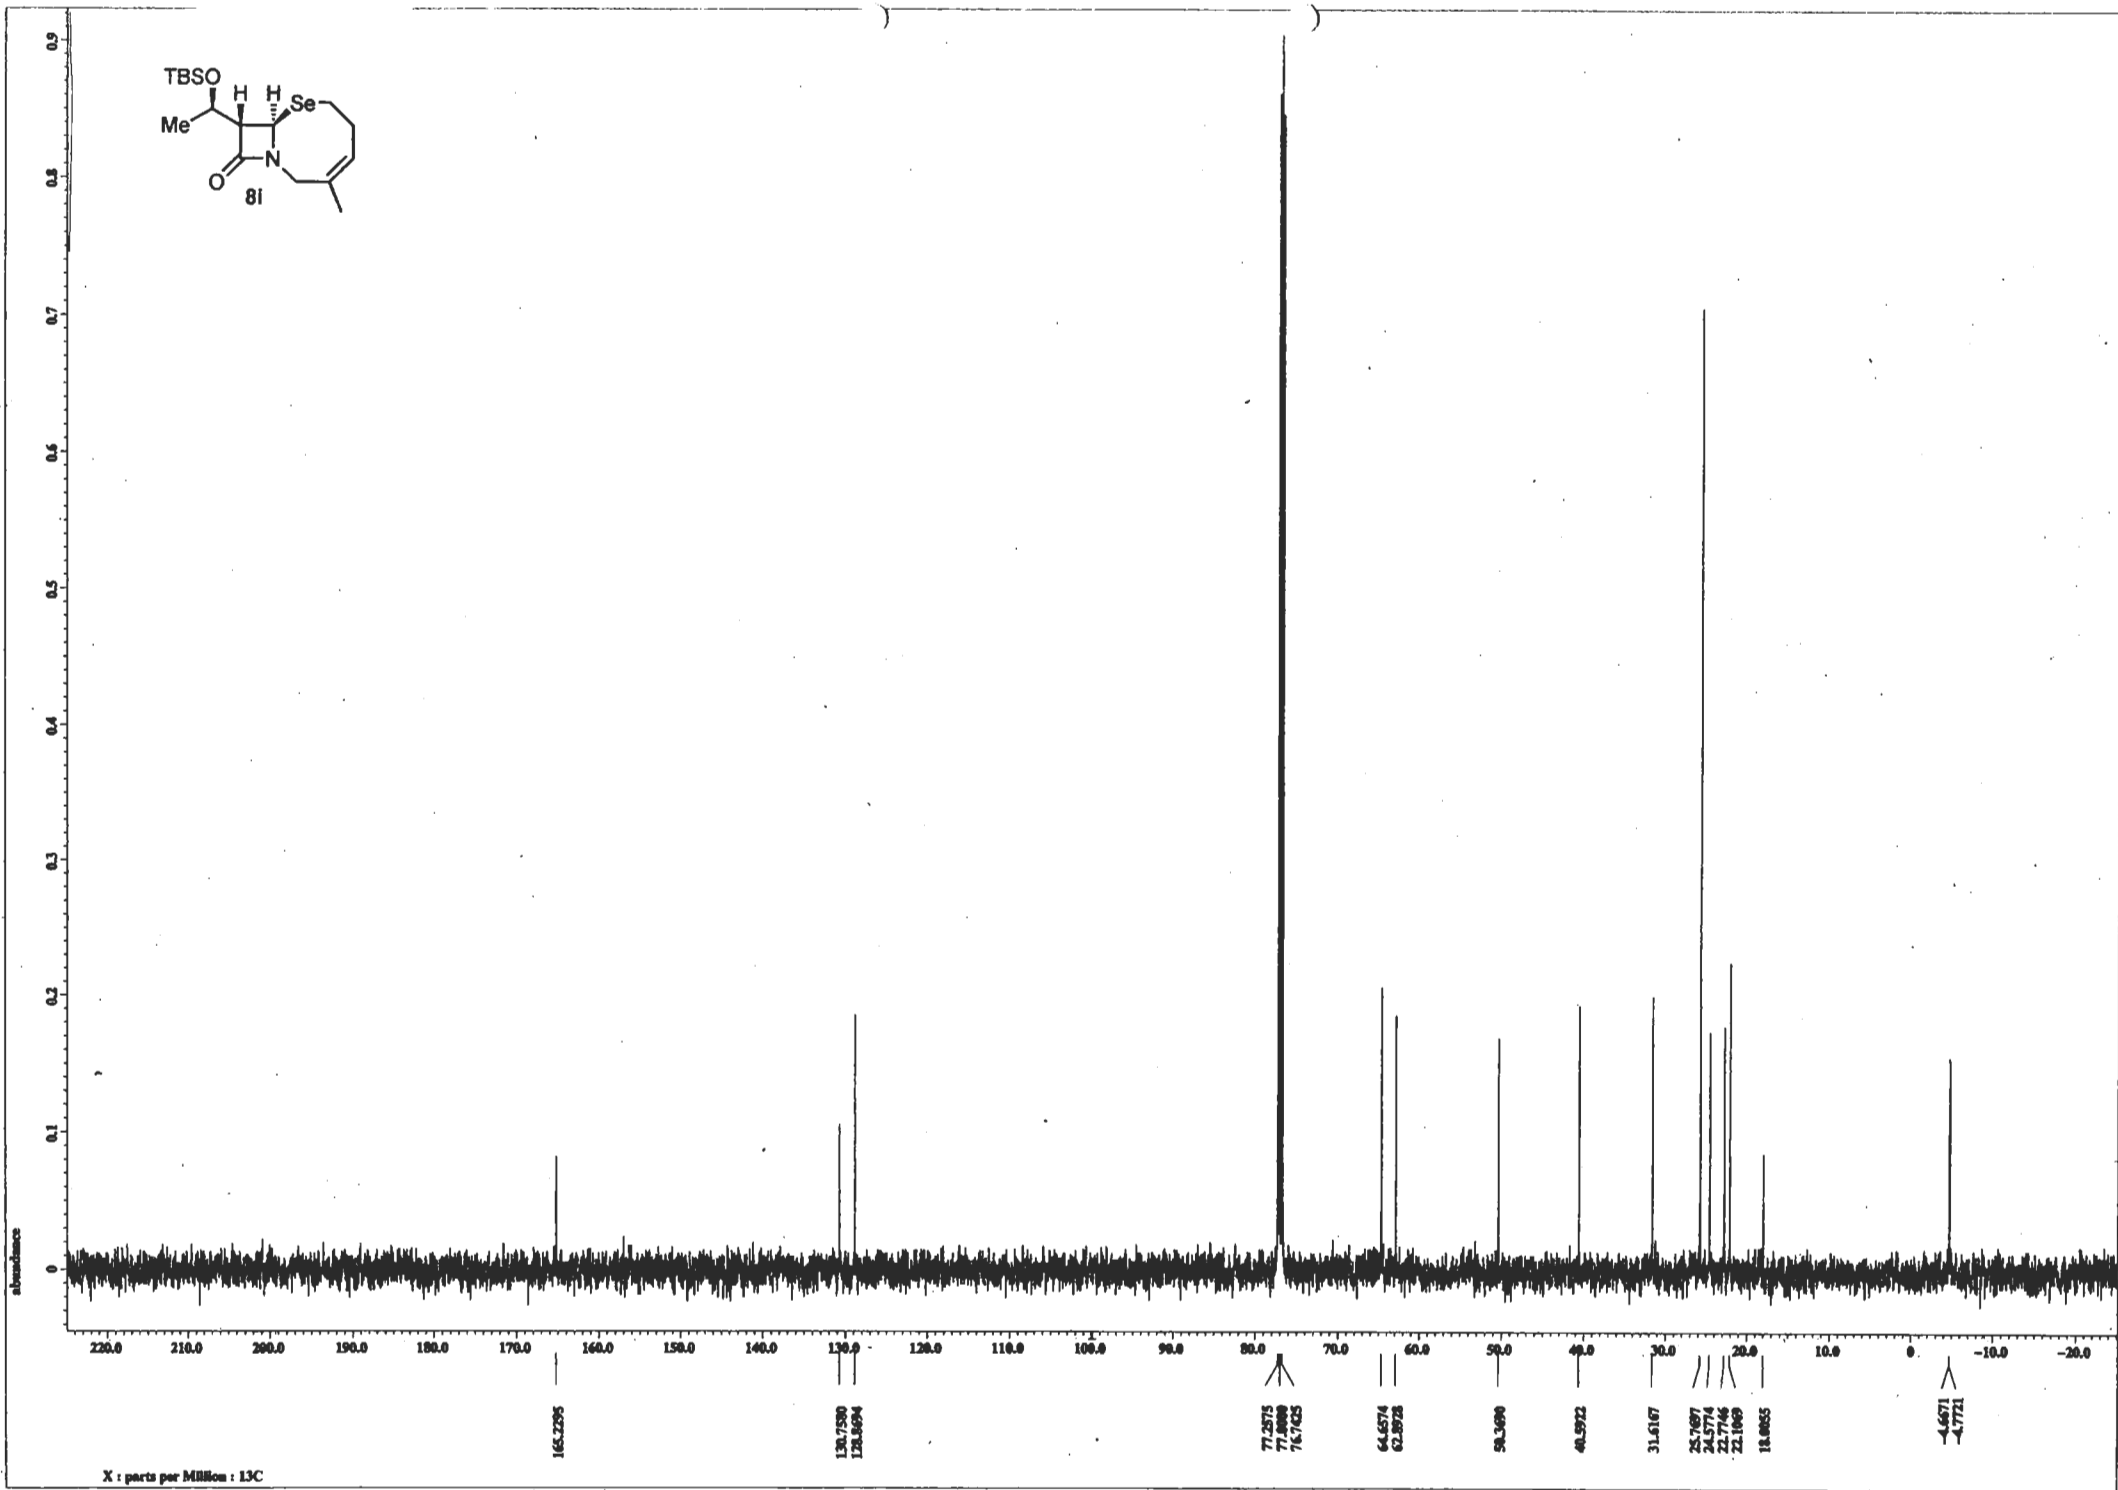

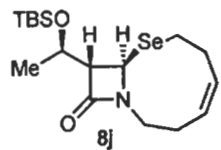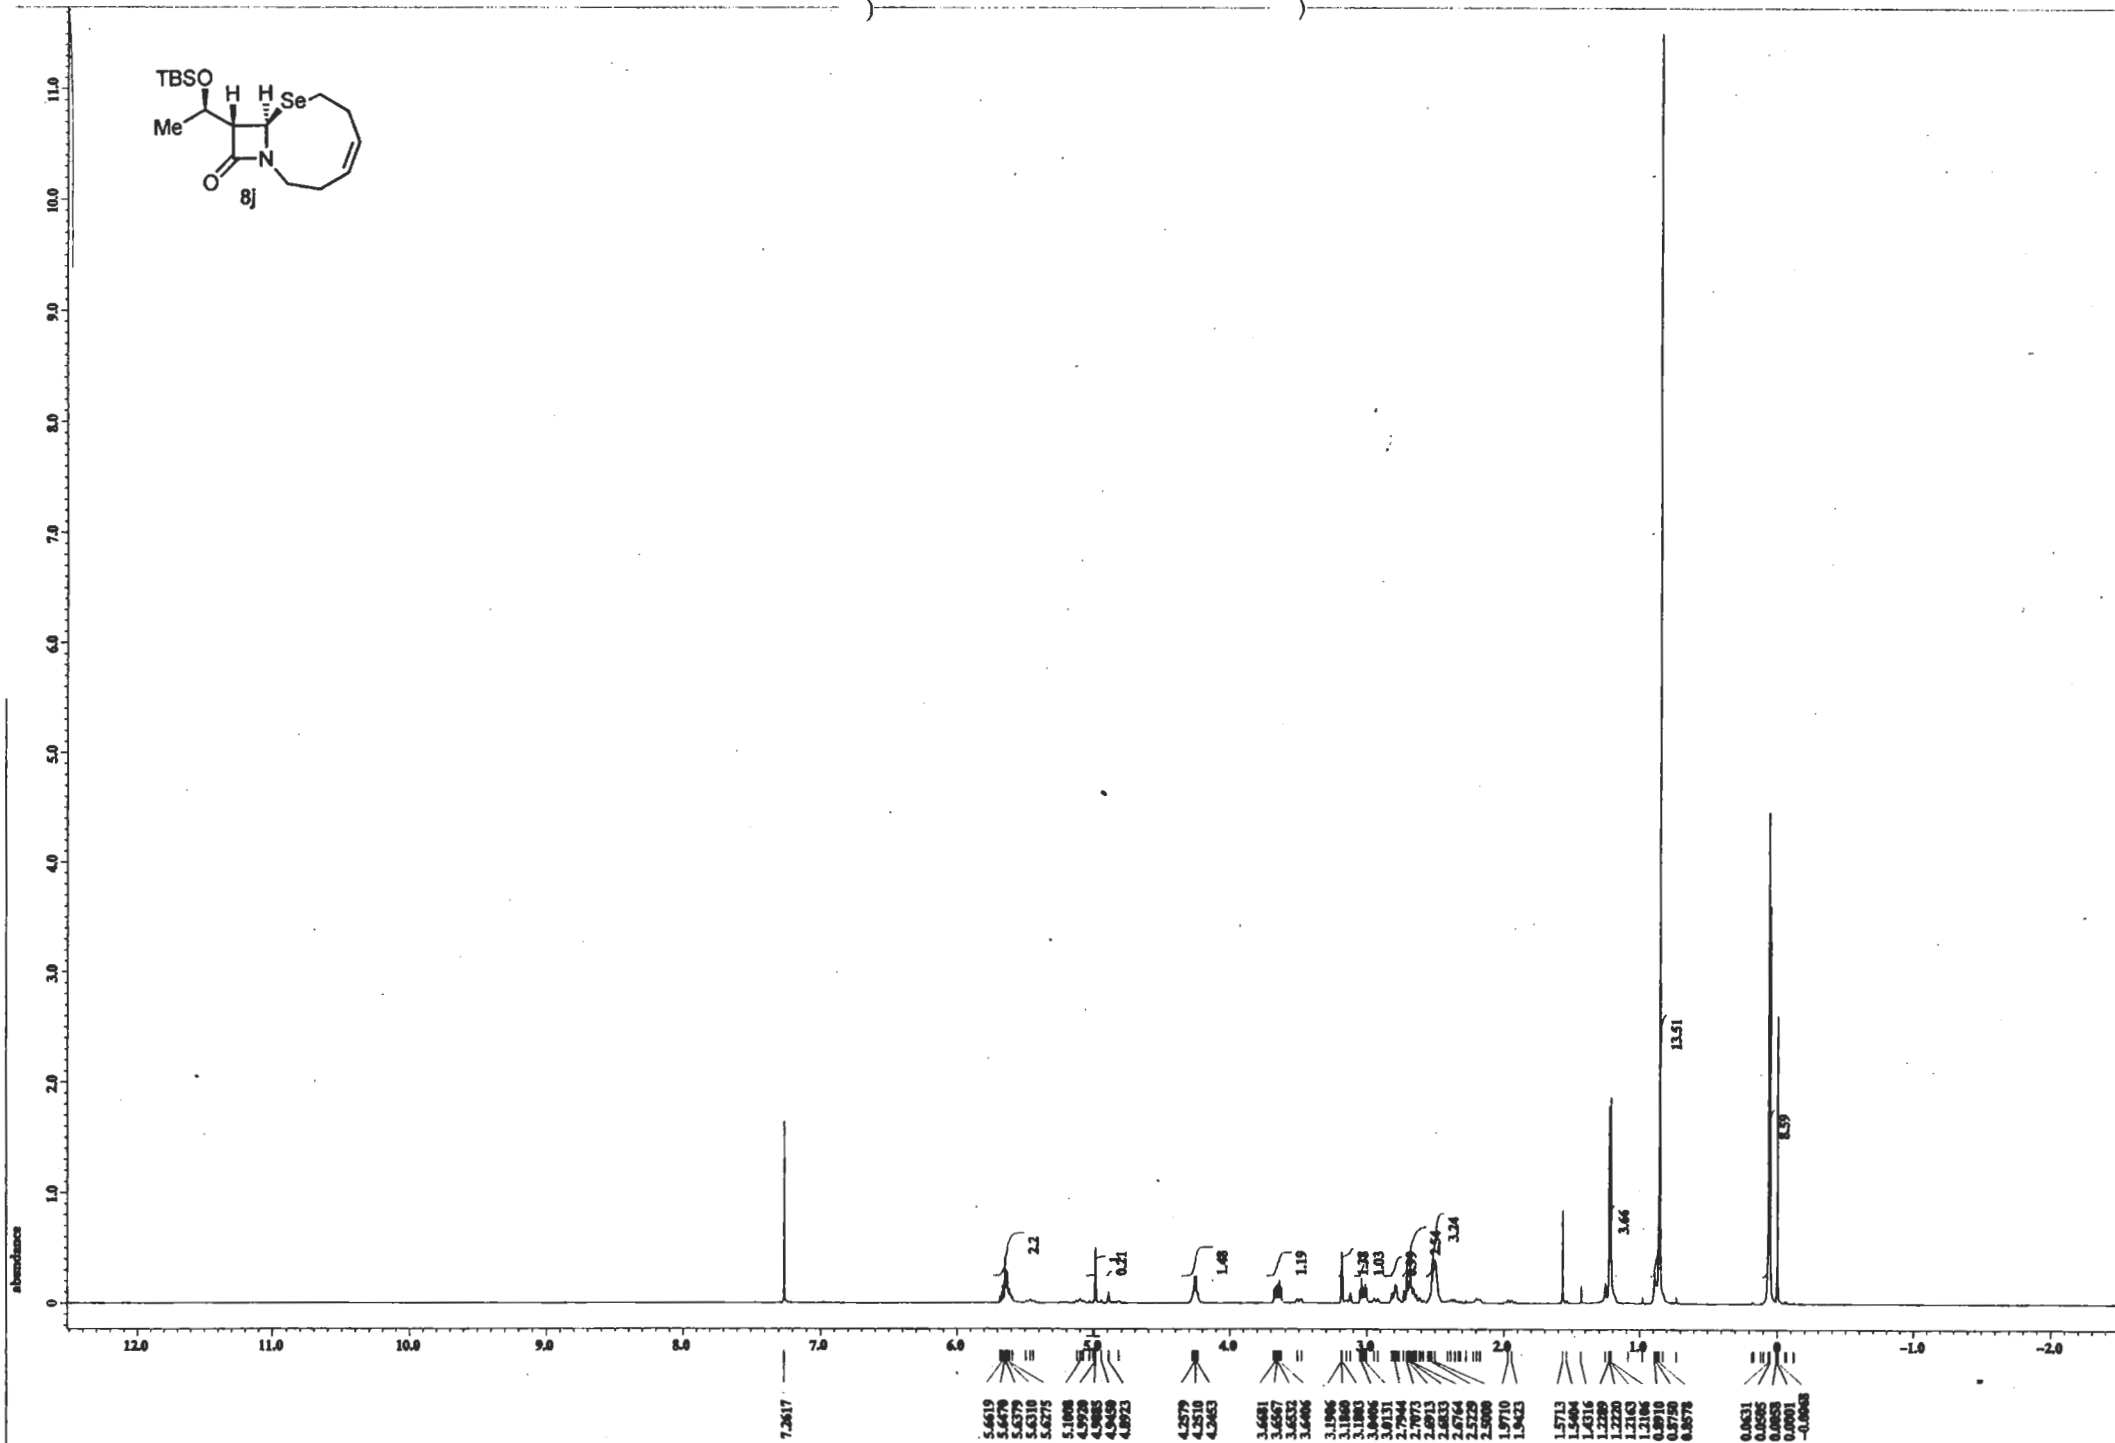

X : parts per Million : 1H
